# Supplementary material for: Overlapping upstream ORFs ending at c.125 lead to reduced Endoglin, contributing to Hereditary Hemorrhagic Telangiectasia
Source: Research Square preprint supplement (doi:10.21203/rs.3.rs-4808835/v1), 2025-05-05
Supplement: Supplementary file 1 [file 18762a0ea4e6f0d3117f4183.xlsx]

## Sheet: Supp. Table 1_Intput MORFEE
Supplementary Table 1. Generated vcf file containing the totality of single nucleotide variants (n = 909) in the 5'UTR of ENG (ENST00000373203.9; NM_001114753.3).
CHROM	POS	REF	ALT
chr9	127854658	T	A
chr9	127854658	T	C
chr9	127854658	T	G
chr9	127854657	A	C
chr9	127854657	A	G
chr9	127854657	A	T
chr9	127854656	T	A
chr9	127854656	T	C
chr9	127854656	T	G
chr9	127854655	G	A
chr9	127854655	G	C
chr9	127854655	G	T
chr9	127854654	G	A
chr9	127854654	G	C
chr9	127854654	G	T
chr9	127854653	T	A
chr9	127854653	T	C
chr9	127854653	T	G
chr9	127854652	G	A
chr9	127854652	G	C
chr9	127854652	G	T
chr9	127854651	T	A
chr9	127854651	T	C
chr9	127854651	T	G
chr9	127854650	C	A
chr9	127854650	C	G
chr9	127854650	C	T
chr9	127854649	G	A
chr9	127854649	G	C
chr9	127854649	G	T
chr9	127854648	G	A
chr9	127854648	G	C
chr9	127854648	G	T
chr9	127854647	A	C
chr9	127854647	A	G
chr9	127854647	A	T
chr9	127854646	A	C
chr9	127854646	A	G
chr9	127854646	A	T
chr9	127854645	G	A
chr9	127854645	G	C
chr9	127854645	G	T
chr9	127854644	T	A
chr9	127854644	T	C
chr9	127854644	T	G
chr9	127854643	A	C
chr9	127854643	A	G
chr9	127854643	A	T
chr9	127854642	G	A
chr9	127854642	G	C
chr9	127854642	G	T
chr9	127854641	A	C
chr9	127854641	A	G
chr9	127854641	A	T
chr9	127854640	C	A
chr9	127854640	C	G
chr9	127854640	C	T
chr9	127854639	G	A
chr9	127854639	G	C
chr9	127854639	G	T
chr9	127854638	C	A
chr9	127854638	C	G
chr9	127854638	C	T
chr9	127854637	G	A
chr9	127854637	G	C
chr9	127854637	G	T
chr9	127854636	G	A
chr9	127854636	G	C
chr9	127854636	G	T
chr9	127854635	G	A
chr9	127854635	G	C
chr9	127854635	G	T
chr9	127854634	A	C
chr9	127854634	A	G
chr9	127854634	A	T
chr9	127854633	C	A
chr9	127854633	C	G
chr9	127854633	C	T
chr9	127854632	C	A
chr9	127854632	C	G
chr9	127854632	C	T
chr9	127854631	C	A
chr9	127854631	C	G
chr9	127854631	C	T
chr9	127854630	C	A
chr9	127854630	C	G
chr9	127854630	C	T
chr9	127854629	G	A
chr9	127854629	G	C
chr9	127854629	G	T
chr9	127854628	G	A
chr9	127854628	G	C
chr9	127854628	G	T
chr9	127854627	T	A
chr9	127854627	T	C
chr9	127854627	T	G
chr9	127854626	C	A
chr9	127854626	C	G
chr9	127854626	C	T
chr9	127854625	C	A
chr9	127854625	C	G
chr9	127854625	C	T
chr9	127854624	T	A
chr9	127854624	T	C
chr9	127854624	T	G
chr9	127854623	G	A
chr9	127854623	G	C
chr9	127854623	G	T
chr9	127854622	A	C
chr9	127854622	A	G
chr9	127854622	A	T
chr9	127854621	C	A
chr9	127854621	C	G
chr9	127854621	C	T
chr9	127854620	G	A
chr9	127854620	G	C
chr9	127854620	G	T
chr9	127854619	A	C
chr9	127854619	A	G
chr9	127854619	A	T
chr9	127854618	C	A
chr9	127854618	C	G
chr9	127854618	C	T
chr9	127854617	G	A
chr9	127854617	G	C
chr9	127854617	G	T
chr9	127854616	A	C
chr9	127854616	A	G
chr9	127854616	A	T
chr9	127854615	C	A
chr9	127854615	C	G
chr9	127854615	C	T
chr9	127854614	A	C
chr9	127854614	A	G
chr9	127854614	A	T
chr9	127854613	G	A
chr9	127854613	G	C
chr9	127854613	G	T
chr9	127854612	T	A
chr9	127854612	T	C
chr9	127854612	T	G
chr9	127854611	G	A
chr9	127854611	G	C
chr9	127854611	G	T
chr9	127854610	A	C
chr9	127854610	A	G
chr9	127854610	A	T
chr9	127854609	C	A
chr9	127854609	C	G
chr9	127854609	C	T
chr9	127854608	G	A
chr9	127854608	G	C
chr9	127854608	G	T
chr9	127854607	G	A
chr9	127854607	G	C
chr9	127854607	G	T
chr9	127854606	T	A
chr9	127854606	T	C
chr9	127854606	T	G
chr9	127854605	A	C
chr9	127854605	A	G
chr9	127854605	A	T
chr9	127854604	G	A
chr9	127854604	G	C
chr9	127854604	G	T
chr9	127854603	G	A
chr9	127854603	G	C
chr9	127854603	G	T
chr9	127854602	T	A
chr9	127854602	T	C
chr9	127854602	T	G
chr9	127854601	A	C
chr9	127854601	A	G
chr9	127854601	A	T
chr9	127854600	A	C
chr9	127854600	A	G
chr9	127854600	A	T
chr9	127854599	C	A
chr9	127854599	C	G
chr9	127854599	C	T
chr9	127854598	C	A
chr9	127854598	C	G
chr9	127854598	C	T
chr9	127854597	T	A
chr9	127854597	T	C
chr9	127854597	T	G
chr9	127854596	C	A
chr9	127854596	C	G
chr9	127854596	C	T
chr9	127854595	G	A
chr9	127854595	G	C
chr9	127854595	G	T
chr9	127854594	G	A
chr9	127854594	G	C
chr9	127854594	G	T
chr9	127854593	G	A
chr9	127854593	G	C
chr9	127854593	G	T
chr9	127854592	T	A
chr9	127854592	T	C
chr9	127854592	T	G
chr9	127854591	C	A
chr9	127854591	C	G
chr9	127854591	C	T
chr9	127854590	G	A
chr9	127854590	G	C
chr9	127854590	G	T
chr9	127854589	T	A
chr9	127854589	T	C
chr9	127854589	T	G
chr9	127854588	G	A
chr9	127854588	G	C
chr9	127854588	G	T
chr9	127854587	G	A
chr9	127854587	G	C
chr9	127854587	G	T
chr9	127854586	G	A
chr9	127854586	G	C
chr9	127854586	G	T
chr9	127854585	G	A
chr9	127854585	G	C
chr9	127854585	G	T
chr9	127854584	G	A
chr9	127854584	G	C
chr9	127854584	G	T
chr9	127854583	A	C
chr9	127854583	A	G
chr9	127854583	A	T
chr9	127854582	G	A
chr9	127854582	G	C
chr9	127854582	G	T
chr9	127854581	G	A
chr9	127854581	G	C
chr9	127854581	G	T
chr9	127854580	G	A
chr9	127854580	G	C
chr9	127854580	G	T
chr9	127854579	G	A
chr9	127854579	G	C
chr9	127854579	G	T
chr9	127854578	C	A
chr9	127854578	C	G
chr9	127854578	C	T
chr9	127854577	G	A
chr9	127854577	G	C
chr9	127854577	G	T
chr9	127854576	G	A
chr9	127854576	G	C
chr9	127854576	G	T
chr9	127854575	G	A
chr9	127854575	G	C
chr9	127854575	G	T
chr9	127854574	T	A
chr9	127854574	T	C
chr9	127854574	T	G
chr9	127854573	A	C
chr9	127854573	A	G
chr9	127854573	A	T
chr9	127854572	G	A
chr9	127854572	G	C
chr9	127854572	G	T
chr9	127854571	G	A
chr9	127854571	G	C
chr9	127854571	G	T
chr9	127854570	A	C
chr9	127854570	A	G
chr9	127854570	A	T
chr9	127854569	A	C
chr9	127854569	A	G
chr9	127854569	A	T
chr9	127854568	G	A
chr9	127854568	G	C
chr9	127854568	G	T
chr9	127854567	C	A
chr9	127854567	C	G
chr9	127854567	C	T
chr9	127854566	C	A
chr9	127854566	C	G
chr9	127854566	C	T
chr9	127854565	T	A
chr9	127854565	T	C
chr9	127854565	T	G
chr9	127854564	G	A
chr9	127854564	G	C
chr9	127854564	G	T
chr9	127854563	T	A
chr9	127854563	T	C
chr9	127854563	T	G
chr9	127854562	C	A
chr9	127854562	C	G
chr9	127854562	C	T
chr9	127854561	G	A
chr9	127854561	G	C
chr9	127854561	G	T
chr9	127854560	T	A
chr9	127854560	T	C
chr9	127854560	T	G
chr9	127854559	T	A
chr9	127854559	T	C
chr9	127854559	T	G
chr9	127854558	G	A
chr9	127854558	G	C
chr9	127854558	G	T
chr9	127854557	A	C
chr9	127854557	A	G
chr9	127854557	A	T
chr9	127854556	G	A
chr9	127854556	G	C
chr9	127854556	G	T
chr9	127854555	G	A
chr9	127854555	G	C
chr9	127854555	G	T
chr9	127854554	T	A
chr9	127854554	T	C
chr9	127854554	T	G
chr9	127854553	C	A
chr9	127854553	C	G
chr9	127854553	C	T
chr9	127854552	G	A
chr9	127854552	G	C
chr9	127854552	G	T
chr9	127854551	G	A
chr9	127854551	G	C
chr9	127854551	G	T
chr9	127854550	G	A
chr9	127854550	G	C
chr9	127854550	G	T
chr9	127854549	T	A
chr9	127854549	T	C
chr9	127854549	T	G
chr9	127854548	C	A
chr9	127854548	C	G
chr9	127854548	C	T
chr9	127854547	G	A
chr9	127854547	G	C
chr9	127854547	G	T
chr9	127854546	G	A
chr9	127854546	G	C
chr9	127854546	G	T
chr9	127854545	G	A
chr9	127854545	G	C
chr9	127854545	G	T
chr9	127854544	G	A
chr9	127854544	G	C
chr9	127854544	G	T
chr9	127854543	C	A
chr9	127854543	C	G
chr9	127854543	C	T
chr9	127854542	G	A
chr9	127854542	G	C
chr9	127854542	G	T
chr9	127854541	C	A
chr9	127854541	C	G
chr9	127854541	C	T
chr9	127854540	A	C
chr9	127854540	A	G
chr9	127854540	A	T
chr9	127854539	G	A
chr9	127854539	G	C
chr9	127854539	G	T
chr9	127854538	G	A
chr9	127854538	G	C
chr9	127854538	G	T
chr9	127854537	G	A
chr9	127854537	G	C
chr9	127854537	G	T
chr9	127854536	A	C
chr9	127854536	A	G
chr9	127854536	A	T
chr9	127854535	C	A
chr9	127854535	C	G
chr9	127854535	C	T
chr9	127854534	A	C
chr9	127854534	A	G
chr9	127854534	A	T
chr9	127854533	C	A
chr9	127854533	C	G
chr9	127854533	C	T
chr9	127854532	A	C
chr9	127854532	A	G
chr9	127854532	A	T
chr9	127854531	G	A
chr9	127854531	G	C
chr9	127854531	G	T
chr9	127854530	G	A
chr9	127854530	G	C
chr9	127854530	G	T
chr9	127854529	T	A
chr9	127854529	T	C
chr9	127854529	T	G
chr9	127854528	G	A
chr9	127854528	G	C
chr9	127854528	G	T
chr9	127854527	A	C
chr9	127854527	A	G
chr9	127854527	A	T
chr9	127854526	A	C
chr9	127854526	A	G
chr9	127854526	A	T
chr9	127854525	G	A
chr9	127854525	G	C
chr9	127854525	G	T
chr9	127854524	A	C
chr9	127854524	A	G
chr9	127854524	A	T
chr9	127854523	G	A
chr9	127854523	G	C
chr9	127854523	G	T
chr9	127854522	G	A
chr9	127854522	G	C
chr9	127854522	G	T
chr9	127854521	A	C
chr9	127854521	A	G
chr9	127854521	A	T
chr9	127854520	C	A
chr9	127854520	C	G
chr9	127854520	C	T
chr9	127854519	T	A
chr9	127854519	T	C
chr9	127854519	T	G
chr9	127854518	G	A
chr9	127854518	G	C
chr9	127854518	G	T
chr9	127854517	G	A
chr9	127854517	G	C
chr9	127854517	G	T
chr9	127854516	G	A
chr9	127854516	G	C
chr9	127854516	G	T
chr9	127854515	G	A
chr9	127854515	G	C
chr9	127854515	G	T
chr9	127854514	A	C
chr9	127854514	A	G
chr9	127854514	A	T
chr9	127854513	G	A
chr9	127854513	G	C
chr9	127854513	G	T
chr9	127854512	C	A
chr9	127854512	C	G
chr9	127854512	C	T
chr9	127854511	C	A
chr9	127854511	C	G
chr9	127854511	C	T
chr9	127854510	G	A
chr9	127854510	G	C
chr9	127854510	G	T
chr9	127854509	G	A
chr9	127854509	G	C
chr9	127854509	G	T
chr9	127854508	C	A
chr9	127854508	C	G
chr9	127854508	C	T
chr9	127854507	G	A
chr9	127854507	G	C
chr9	127854507	G	T
chr9	127854506	G	A
chr9	127854506	G	C
chr9	127854506	G	T
chr9	127854505	T	A
chr9	127854505	T	C
chr9	127854505	T	G
chr9	127854504	G	A
chr9	127854504	G	C
chr9	127854504	G	T
chr9	127854503	G	A
chr9	127854503	G	C
chr9	127854503	G	T
chr9	127854502	G	A
chr9	127854502	G	C
chr9	127854502	G	T
chr9	127854501	G	A
chr9	127854501	G	C
chr9	127854501	G	T
chr9	127854500	T	A
chr9	127854500	T	C
chr9	127854500	T	G
chr9	127854499	C	A
chr9	127854499	C	G
chr9	127854499	C	T
chr9	127854498	T	A
chr9	127854498	T	C
chr9	127854498	T	G
chr9	127854497	T	A
chr9	127854497	T	C
chr9	127854497	T	G
chr9	127854496	C	A
chr9	127854496	C	G
chr9	127854496	C	T
chr9	127854495	C	A
chr9	127854495	C	G
chr9	127854495	C	T
chr9	127854494	G	A
chr9	127854494	G	C
chr9	127854494	G	T
chr9	127854493	A	C
chr9	127854493	A	G
chr9	127854493	A	T
chr9	127854492	C	A
chr9	127854492	C	G
chr9	127854492	C	T
chr9	127854491	C	A
chr9	127854491	C	G
chr9	127854491	C	T
chr9	127854490	T	A
chr9	127854490	T	C
chr9	127854490	T	G
chr9	127854489	C	A
chr9	127854489	C	G
chr9	127854489	C	T
chr9	127854488	G	A
chr9	127854488	G	C
chr9	127854488	G	T
chr9	127854487	T	A
chr9	127854487	T	C
chr9	127854487	T	G
chr9	127854486	C	A
chr9	127854486	C	G
chr9	127854486	C	T
chr9	127854485	C	A
chr9	127854485	C	G
chr9	127854485	C	T
chr9	127854484	C	A
chr9	127854484	C	G
chr9	127854484	C	T
chr9	127854483	T	A
chr9	127854483	T	C
chr9	127854483	T	G
chr9	127854482	G	A
chr9	127854482	G	C
chr9	127854482	G	T
chr9	127854481	C	A
chr9	127854481	C	G
chr9	127854481	C	T
chr9	127854480	G	A
chr9	127854480	G	C
chr9	127854480	G	T
chr9	127854479	G	A
chr9	127854479	G	C
chr9	127854479	G	T
chr9	127854478	C	A
chr9	127854478	C	G
chr9	127854478	C	T
chr9	127854477	A	C
chr9	127854477	A	G
chr9	127854477	A	T
chr9	127854476	G	A
chr9	127854476	G	C
chr9	127854476	G	T
chr9	127854475	C	A
chr9	127854475	C	G
chr9	127854475	C	T
chr9	127854474	G	A
chr9	127854474	G	C
chr9	127854474	G	T
chr9	127854473	A	C
chr9	127854473	A	G
chr9	127854473	A	T
chr9	127854472	G	A
chr9	127854472	G	C
chr9	127854472	G	T
chr9	127854471	G	A
chr9	127854471	G	C
chr9	127854471	G	T
chr9	127854470	C	A
chr9	127854470	C	G
chr9	127854470	C	T
chr9	127854469	C	A
chr9	127854469	C	G
chr9	127854469	C	T
chr9	127854468	G	A
chr9	127854468	G	C
chr9	127854468	G	T
chr9	127854467	G	A
chr9	127854467	G	C
chr9	127854467	G	T
chr9	127854466	C	A
chr9	127854466	C	G
chr9	127854466	C	T
chr9	127854465	G	A
chr9	127854465	G	C
chr9	127854465	G	T
chr9	127854464	G	A
chr9	127854464	G	C
chr9	127854464	G	T
chr9	127854463	A	C
chr9	127854463	A	G
chr9	127854463	A	T
chr9	127854462	C	A
chr9	127854462	C	G
chr9	127854462	C	T
chr9	127854461	G	A
chr9	127854461	G	C
chr9	127854461	G	T
chr9	127854460	A	C
chr9	127854460	A	G
chr9	127854460	A	T
chr9	127854459	G	A
chr9	127854459	G	C
chr9	127854459	G	T
chr9	127854458	G	A
chr9	127854458	G	C
chr9	127854458	G	T
chr9	127854457	G	A
chr9	127854457	G	C
chr9	127854457	G	T
chr9	127854456	G	A
chr9	127854456	G	C
chr9	127854456	G	T
chr9	127854455	A	C
chr9	127854455	A	G
chr9	127854455	A	T
chr9	127854454	G	A
chr9	127854454	G	C
chr9	127854454	G	T
chr9	127854453	C	A
chr9	127854453	C	G
chr9	127854453	C	T
chr9	127854452	C	A
chr9	127854452	C	G
chr9	127854452	C	T
chr9	127854451	C	A
chr9	127854451	C	G
chr9	127854451	C	T
chr9	127854450	A	C
chr9	127854450	A	G
chr9	127854450	A	T
chr9	127854449	G	A
chr9	127854449	G	C
chr9	127854449	G	T
chr9	127854448	G	A
chr9	127854448	G	C
chr9	127854448	G	T
chr9	127854447	G	A
chr9	127854447	G	C
chr9	127854447	G	T
chr9	127854446	G	A
chr9	127854446	G	C
chr9	127854446	G	T
chr9	127854445	C	A
chr9	127854445	C	G
chr9	127854445	C	T
chr9	127854444	A	C
chr9	127854444	A	G
chr9	127854444	A	T
chr9	127854443	C	A
chr9	127854443	C	G
chr9	127854443	C	T
chr9	127854442	G	A
chr9	127854442	G	C
chr9	127854442	G	T
chr9	127854441	C	A
chr9	127854441	C	G
chr9	127854441	C	T
chr9	127854440	T	A
chr9	127854440	T	C
chr9	127854440	T	G
chr9	127854439	C	A
chr9	127854439	C	G
chr9	127854439	C	T
chr9	127854438	G	A
chr9	127854438	G	C
chr9	127854438	G	T
chr9	127854437	G	A
chr9	127854437	G	C
chr9	127854437	G	T
chr9	127854436	G	A
chr9	127854436	G	C
chr9	127854436	G	T
chr9	127854435	T	A
chr9	127854435	T	C
chr9	127854435	T	G
chr9	127854434	G	A
chr9	127854434	G	C
chr9	127854434	G	T
chr9	127854433	C	A
chr9	127854433	C	G
chr9	127854433	C	T
chr9	127854432	G	A
chr9	127854432	G	C
chr9	127854432	G	T
chr9	127854431	G	A
chr9	127854431	G	C
chr9	127854431	G	T
chr9	127854430	C	A
chr9	127854430	C	G
chr9	127854430	C	T
chr9	127854429	C	A
chr9	127854429	C	G
chr9	127854429	C	T
chr9	127854428	G	A
chr9	127854428	G	C
chr9	127854428	G	T
chr9	127854427	G	A
chr9	127854427	G	C
chr9	127854427	G	T
chr9	127854426	G	A
chr9	127854426	G	C
chr9	127854426	G	T
chr9	127854425	G	A
chr9	127854425	G	C
chr9	127854425	G	T
chr9	127854424	C	A
chr9	127854424	C	G
chr9	127854424	C	T
chr9	127854423	C	A
chr9	127854423	C	G
chr9	127854423	C	T
chr9	127854422	A	C
chr9	127854422	A	G
chr9	127854422	A	T
chr9	127854421	C	A
chr9	127854421	C	G
chr9	127854421	C	T
chr9	127854420	G	A
chr9	127854420	G	C
chr9	127854420	G	T
chr9	127854419	G	A
chr9	127854419	G	C
chr9	127854419	G	T
chr9	127854418	G	A
chr9	127854418	G	C
chr9	127854418	G	T
chr9	127854417	C	A
chr9	127854417	C	G
chr9	127854417	C	T
chr9	127854416	G	A
chr9	127854416	G	C
chr9	127854416	G	T
chr9	127854415	G	A
chr9	127854415	G	C
chr9	127854415	G	T
chr9	127854414	G	A
chr9	127854414	G	C
chr9	127854414	G	T
chr9	127854413	C	A
chr9	127854413	C	G
chr9	127854413	C	T
chr9	127854412	G	A
chr9	127854412	G	C
chr9	127854412	G	T
chr9	127854411	T	A
chr9	127854411	T	C
chr9	127854411	T	G
chr9	127854410	C	A
chr9	127854410	C	G
chr9	127854410	C	T
chr9	127854409	G	A
chr9	127854409	G	C
chr9	127854409	G	T
chr9	127854408	G	A
chr9	127854408	G	C
chr9	127854408	G	T
chr9	127854407	G	A
chr9	127854407	G	C
chr9	127854407	G	T
chr9	127854406	A	C
chr9	127854406	A	G
chr9	127854406	A	T
chr9	127854405	C	A
chr9	127854405	C	G
chr9	127854405	C	T
chr9	127854404	G	A
chr9	127854404	G	C
chr9	127854404	G	T
chr9	127854403	G	A
chr9	127854403	G	C
chr9	127854403	G	T
chr9	127854402	T	A
chr9	127854402	T	C
chr9	127854402	T	G
chr9	127854401	G	A
chr9	127854401	G	C
chr9	127854401	G	T
chr9	127854400	A	C
chr9	127854400	A	G
chr9	127854400	A	T
chr9	127854399	C	A
chr9	127854399	C	G
chr9	127854399	C	T
chr9	127854398	C	A
chr9	127854398	C	G
chr9	127854398	C	T
chr9	127854397	T	A
chr9	127854397	T	C
chr9	127854397	T	G
chr9	127854396	G	A
chr9	127854396	G	C
chr9	127854396	G	T
chr9	127854395	T	A
chr9	127854395	T	C
chr9	127854395	T	G
chr9	127854394	G	A
chr9	127854394	G	C
chr9	127854394	G	T
chr9	127854393	T	A
chr9	127854393	T	C
chr9	127854393	T	G
chr9	127854392	C	A
chr9	127854392	C	G
chr9	127854392	C	T
chr9	127854391	C	A
chr9	127854391	C	G
chr9	127854391	C	T
chr9	127854390	T	A
chr9	127854390	T	C
chr9	127854390	T	G
chr9	127854389	A	C
chr9	127854389	A	G
chr9	127854389	A	T
chr9	127854388	T	A
chr9	127854388	T	C
chr9	127854388	T	G
chr9	127854387	T	A
chr9	127854387	T	C
chr9	127854387	T	G
chr9	127854386	C	A
chr9	127854386	C	G
chr9	127854386	C	T
chr9	127854385	C	A
chr9	127854385	C	G
chr9	127854385	C	T
chr9	127854384	G	A
chr9	127854384	G	C
chr9	127854384	G	T
chr9	127854383	G	A
chr9	127854383	G	C
chr9	127854383	G	T
chr9	127854382	G	A
chr9	127854382	G	C
chr9	127854382	G	T
chr9	127854381	T	A
chr9	127854381	T	C
chr9	127854381	T	G
chr9	127854380	C	A
chr9	127854380	C	G
chr9	127854380	C	T
chr9	127854379	G	A
chr9	127854379	G	C
chr9	127854379	G	T
chr9	127854378	C	A
chr9	127854378	C	G
chr9	127854378	C	T
chr9	127854377	G	A
chr9	127854377	G	C
chr9	127854377	G	T
chr9	127854376	T	A
chr9	127854376	T	C
chr9	127854376	T	G
chr9	127854375	G	A
chr9	127854375	G	C
chr9	127854375	G	T
chr9	127854374	T	A
chr9	127854374	T	C
chr9	127854374	T	G
chr9	127854373	C	A
chr9	127854373	C	G
chr9	127854373	C	T
chr9	127854372	C	A
chr9	127854372	C	G
chr9	127854372	C	T
chr9	127854371	G	A
chr9	127854371	G	C
chr9	127854371	G	T
chr9	127854370	G	A
chr9	127854370	G	C
chr9	127854370	G	T
chr9	127854369	G	A
chr9	127854369	G	C
chr9	127854369	G	T
chr9	127854368	G	A
chr9	127854368	G	C
chr9	127854368	G	T
chr9	127854367	G	A
chr9	127854367	G	C
chr9	127854367	G	T
chr9	127854366	T	A
chr9	127854366	T	C
chr9	127854366	T	G
chr9	127854365	G	A
chr9	127854365	G	C
chr9	127854365	G	T
chr9	127854364	C	A
chr9	127854364	C	G
chr9	127854364	C	T
chr9	127854363	A	C
chr9	127854363	A	G
chr9	127854363	A	T
chr9	127854362	C	A
chr9	127854362	C	G
chr9	127854362	C	T
chr9	127854361	C	A
chr9	127854361	C	G
chr9	127854361	C	T
chr9	127854360	T	A
chr9	127854360	T	C
chr9	127854360	T	G
chr9	127854359	G	A
chr9	127854359	G	C
chr9	127854359	G	T
chr9	127854358	T	A
chr9	127854358	T	C
chr9	127854358	T	G
chr9	127854357	C	A
chr9	127854357	C	G
chr9	127854357	C	T
chr9	127854356	G	A
chr9	127854356	G	C
chr9	127854356	G	T

## Sheet: Supp. Table 2_Output MORFEE
Supplementary Table 2. Single nucleotide variants in the 5'UTR of ENG (ENST00000373203.9; NM_001114753.3) annotated with MORFEE to: create new upstream Translation Initiation Sites (uTIS), create new upstream stop codons (New_Stop), and/or detele upstream stop codons (uStop).
The 14 variants creating overlapping upstream Open Reading Frames ending with the stop codon at position c.125 and experimentally characterized are bolded.
seqnames	start	REF	ALT	Transcript	RefSeq_transcript	Gene.ensGene	avsnp150	Mutation	Func.ensGene	orfSNVs_type	orfSNVs_frame	type_of_generated_ORF	Ratio_length_pred_obs	NewAALength	ORF_size	MORFEE_uTIS	MORFEE_dTIS	MORFEE_intTIS	MORFEE_uSTOP	MORFEE_dSTOP	MORFEE_intSTOP	MORFEE_uSTOP_creation	MORFEE_dSTOP_creation	MORFEE_intSTOP_creation	TIS_sequence	TIS_type	modification_type	STOP_sequence	CDS_start_position	CDS_end_position	TIS_position	STOP_position	Kozak_sequence	Kozak_score	Kozak_strength	TIS_c_pos	STOP_c_pos	gnomad312_AF	gnomad312_AF_popmax	CLNDN	CLNDISB	CLNSIG
chr9	127854656	T	A	ENST00000373203.9:reverse	NM_001114753.3	ENG	.	c.-301A>T	UTR5	uTIS	in_frame	elongated_CDS	1.15349544072948	759/658	2280	ENST00000373203.9:reverse,c.-301A>T,303,in_frame,ATT,UTR5,non_canonical_TIS,non_canonical_TIS(ATA)_to_non_canonical_TIS(ATT),elongated_CDS,759[/658](aa),2280,127854355,127854658,127815684,127815682,na,na,c.-303,c.1975,na,TAG,NM_001114753.3	NA	NA	NA	NA	NA	NA	NA	NA	ATT	non_canonical_TIS	non_canonical_TIS(ATA)_to_non_canonical_TIS(ATT)	TAG	127854355	127815682	127854658	127815684	na	na	na	c.-303	c.1975	.	.	.	.	.
chr9	127854656	T	C	ENST00000373203.9:reverse	NM_001114753.3	ENG	.	c.-301A>G	UTR5	uTIS	in_frame	elongated_CDS	1.15349544072948	759/658	2280	ENST00000373203.9:reverse,c.-301A>G,303,in_frame,ATG,UTR5,canonical_TIS,non_canonical_TIS(ATA)_to_canonical_TIS(ATG),elongated_CDS,759[/658](aa),2280,127854355,127854658,127815684,127815682,na,na,c.-303,c.1975,na,TAG,NM_001114753.3	NA	NA	NA	NA	NA	NA	NA	NA	ATG	canonical_TIS	non_canonical_TIS(ATA)_to_canonical_TIS(ATG)	TAG	127854355	127815682	127854658	127815684	na	na	na	c.-303	c.1975	.	.	.	.	.
chr9	127854656	T	G	ENST00000373203.9:reverse	NM_001114753.3	ENG	.	c.-301A>C	UTR5	uTIS	in_frame	elongated_CDS	1.15349544072948	759/658	2280	ENST00000373203.9:reverse,c.-301A>C,303,in_frame,ATC,UTR5,non_canonical_TIS,non_canonical_TIS(ATA)_to_non_canonical_TIS(ATC),elongated_CDS,759[/658](aa),2280,127854355,127854658,127815684,127815682,na,na,c.-303,c.1975,na,TAG,NM_001114753.3	NA	NA	NA	NA	NA	NA	NA	NA	ATC	non_canonical_TIS	non_canonical_TIS(ATA)_to_non_canonical_TIS(ATC)	TAG	127854355	127815682	127854658	127815684	na	na	na	c.-303	c.1975	.	.	.	.	.
chr9	127854655	G	A	ENST00000373203.9:reverse	NM_001114753.3	ENG	.	c.-300C>T	UTR5	uTIS	out_of_frame_(1)	not_overlapping	0.0683890577507599	45/658	138	ENST00000373203.9:reverse,c.-300C>T,301,out_of_frame_(1),ATC,UTR5,non_canonical_TIS,non_TIS(ACC)_to_non_canonical_TIS(ATC),not_overlapping,45[/658](aa),138,127854355,127854656,127854521,127815682,na,na,c.-301,c.-166,na,TGA,NM_001114753.3	NA	NA	NA	NA	NA	NA	NA	NA	ATC	non_canonical_TIS	non_TIS(ACC)_to_non_canonical_TIS(ATC)	TGA	127854355	127815682	127854656	127854521	na	na	na	c.-301	c.-166	.	.	.	.	.
chr9	127854654	G	C	ENST00000373203.9:reverse	NM_001114753.3	ENG	.	c.-299C>G	UTR5	uTIS	out_of_frame_(1)	not_overlapping	0.0683890577507599	45/658	138	ENST00000373203.9:reverse,c.-299C>G,301,out_of_frame_(1),ACG,UTR5,non_canonical_TIS,non_TIS(ACC)_to_non_canonical_TIS(ACG),not_overlapping,45[/658](aa),138,127854355,127854656,127854521,127815682,na,na,c.-301,c.-166,na,TGA,NM_001114753.3	NA	NA	NA	NA	NA	NA	NA	NA	ACG	non_canonical_TIS	non_TIS(ACC)_to_non_canonical_TIS(ACG)	TGA	127854355	127815682	127854656	127854521	na	na	na	c.-301	c.-166	.	.	.	.	.
chr9	127854652	G	A	ENST00000373203.9:reverse	NM_001114753.3	ENG	.	c.-297C>T	UTR5	uTIS	out_of_frame_(1)	not_overlapping	0.0668693009118541	44/658	135	ENST00000373203.9:reverse,c.-297C>T,298,out_of_frame_(1),ATA,UTR5,non_canonical_TIS,non_TIS(ACA)_to_non_canonical_TIS(ATA),not_overlapping,44[/658](aa),135,127854355,127854653,127854521,127815682,na,na,c.-298,c.-166,na,TGA,NM_001114753.3	NA	NA	NA	NA	NA	NA	NA	NA	ATA	non_canonical_TIS	non_TIS(ACA)_to_non_canonical_TIS(ATA)	TGA	127854355	127815682	127854653	127854521	na	na	na	c.-298	c.-166	.	.	.	.	.
chr9	127854652	G	T	ENST00000373203.9:reverse	NM_001114753.3	ENG	.	c.-297C>A	UTR5	uTIS	in_frame	elongated_CDS	1.15045592705167	757/658	2274	ENST00000373203.9:reverse,c.-297C>A,297,in_frame,AAG,UTR5,non_canonical_TIS,non_TIS(CAG)_to_non_canonical_TIS(AAG),elongated_CDS,757[/658](aa),2274,127854355,127854652,127815684,127815682,na,na,c.-297,c.1975,na,TAG,NM_001114753.3	NA	NA	NA	NA	NA	NA	NA	NA	AAG	non_canonical_TIS	non_TIS(CAG)_to_non_canonical_TIS(AAG)	TAG	127854355	127815682	127854652	127815684	na	na	na	c.-297	c.1975	.	.	.	.	.
chr9	127854651	T	A	ENST00000373203.9:reverse	NM_001114753.3	ENG	.	c.-296A>T	UTR5	uTIS	in_frame	elongated_CDS	1.15045592705167	757/658	2274	ENST00000373203.9:reverse,c.-296A>T,297,in_frame,CTG,UTR5,non_canonical_TIS,non_TIS(CAG)_to_non_canonical_TIS(CTG),elongated_CDS,757[/658](aa),2274,127854355,127854652,127815684,127815682,na,na,c.-297,c.1975,na,TAG,NM_001114753.3	NA	NA	NA	NA	NA	NA	NA	NA	CTG	non_canonical_TIS	non_TIS(CAG)_to_non_canonical_TIS(CTG)	TAG	127854355	127815682	127854652	127815684	na	na	na	c.-297	c.1975	6.573e-06	1.471e-05	.	.	.
chr9	127854651	T	C	ENST00000373203.9:reverse	NM_001114753.3	ENG	.	c.-296A>G	UTR5	uTIS	out_of_frame_(1)	not_overlapping	0.0668693009118541	44/658	135	ENST00000373203.9:reverse,c.-296A>G,298,out_of_frame_(1),ACG,UTR5,non_canonical_TIS,non_TIS(ACA)_to_non_canonical_TIS(ACG),not_overlapping,44[/658](aa),135,127854355,127854653,127854521,127815682,na,na,c.-298,c.-166,na,TGA,NM_001114753.3	NA	NA	NA	NA	NA	NA	NA	NA	ACG	non_canonical_TIS	non_TIS(ACA)_to_non_canonical_TIS(ACG)	TGA	127854355	127815682	127854653	127854521	na	na	na	c.-298	c.-166	.	.	.	.	.
chr9	127854650	C	A	ENST00000373203.9:reverse	NM_001114753.3	ENG	.	c.-295G>T	UTR5	uTIS	out_of_frame_(2)	overlapping_6.28%	0.212765957446809	140/658	423	ENST00000373203.9:reverse,c.-295G>T,296,out_of_frame_(2),ATC,UTR5,non_canonical_TIS,non_TIS(AGC)_to_non_canonical_TIS(ATC),overlapping_6.28%,140[/658](aa),423,127854355,127854651,127843188,127815682,na,na,c.-296,c.125,na,TGA,NM_001114753.3	NA	NA	NA	NA	NA	NA	NA	NA	ATC	non_canonical_TIS	non_TIS(AGC)_to_non_canonical_TIS(ATC)	TGA	127854355	127815682	127854651	127843188	na	na	na	c.-296	c.125	.	.	.	.	.
chr9	127854649	G	C	ENST00000373203.9:reverse	NM_001114753.3	ENG	.	c.-294C>G	UTR5	uTIS	out_of_frame_(2)	overlapping_6.28%	0.212765957446809	140/658	423	ENST00000373203.9:reverse,c.-294C>G,296,out_of_frame_(2),AGG,UTR5,non_canonical_TIS,non_TIS(AGC)_to_non_canonical_TIS(AGG),overlapping_6.28%,140[/658](aa),423,127854355,127854651,127843188,127815682,na,na,c.-296,c.125,na,TGA,NM_001114753.3	NA	NA	NA	NA	NA	NA	NA	NA	AGG	non_canonical_TIS	non_TIS(AGC)_to_non_canonical_TIS(AGG)	TGA	127854355	127815682	127854651	127843188	na	na	na	c.-296	c.125	.	.	.	.	.
chr9	127854648	G	T	ENST00000373203.9:reverse	NM_001114753.3	ENG	.	c.-293C>A	UTR5	uTIS	out_of_frame_(2)	overlapping_6.28%	0.211246200607903	139/658	420	ENST00000373203.9:reverse,c.-293C>A,293,out_of_frame_(2),ATT,UTR5,non_canonical_TIS,non_TIS(CTT)_to_non_canonical_TIS(ATT),overlapping_6.28%,139[/658](aa),420,127854355,127854648,127843188,127815682,ATACCACAGCATTCATCTGCGCC,0.726760562204325,c.-293,c.125,moderate,TGA,NM_001114753.3	NA	NA	NA	NA	NA	NA	NA	NA	ATT	non_canonical_TIS	non_TIS(CTT)_to_non_canonical_TIS(ATT)	TGA	127854355	127815682	127854648	127843188	ATACCACAGCATTCATCTGCGCC	0.726760562204325	moderate	c.-293	c.125	.	.	.	.	.
chr9	127854647	A	T	ENST00000373203.9:reverse	NM_001114753.3	ENG	.	c.-292T>A	UTR5	uTIS	out_of_frame_(1)	not_overlapping	0.0638297872340425	42/658	129	ENST00000373203.9:reverse,c.-292T>A,292,out_of_frame_(1),ATC,UTR5,non_canonical_TIS,non_TIS(TTC)_to_non_canonical_TIS(ATC),not_overlapping,42[/658](aa),129,127854355,127854647,127854521,127815682,TACCACAGCCATCATCTGCGCCC,0.692957742619322,c.-292,c.-166,moderate,TGA,NM_001114753.3	NA	NA	NA	NA	NA	NA	NA	NA	ATC	non_canonical_TIS	non_TIS(TTC)_to_non_canonical_TIS(ATC)	TGA	127854355	127815682	127854647	127854521	TACCACAGCCATCATCTGCGCCC	0.692957742619322	moderate	c.-292	c.-166	.	.	.	.	.
chr9	127854646	A	C	ENST00000373203.9:reverse	NM_001114753.3	ENG	rs1057468665	c.-291T>G	UTR5	uTIS	out_of_frame_(2)	overlapping_6.28%	0.211246200607903	139/658	420	ENST00000373203.9:reverse,c.-291T>G,293,out_of_frame_(2),CTG,UTR5,non_canonical_TIS,non_TIS(CTT)_to_non_canonical_TIS(CTG),overlapping_6.28%,139[/658](aa),420,127854355,127854648,127843188,127815682,ATACCACAGCCTGCATCTGCGCC,0.726760562204325,c.-293,c.125,moderate,TGA,NM_001114753.3	NA	NA	NA	NA	NA	NA	NA	NA	CTG	non_canonical_TIS	non_TIS(CTT)_to_non_canonical_TIS(CTG)	TGA	127854355	127815682	127854648	127843188	ATACCACAGCCTGCATCTGCGCC	0.726760562204325	moderate	c.-293	c.125	3.286e-05	9.652e-05	.	.	.
chr9	127854645	G	C	ENST00000373203.9:reverse	NM_001114753.3	ENG	.	c.-290C>G	UTR5	uTIS	out_of_frame_(1)	not_overlapping	0.0638297872340425	42/658	129	ENST00000373203.9:reverse,c.-290C>G,292,out_of_frame_(1),TTG,UTR5,non_canonical_TIS,non_TIS(TTC)_to_non_canonical_TIS(TTG),not_overlapping,42[/658](aa),129,127854355,127854647,127854521,127815682,TACCACAGCCTTGATCTGCGCCC,0.692957742619322,c.-292,c.-166,moderate,TGA,NM_001114753.3	NA	NA	NA	NA	NA	NA	NA	NA	TTG	non_canonical_TIS	non_TIS(TTC)_to_non_canonical_TIS(TTG)	TGA	127854355	127815682	127854647	127854521	TACCACAGCCTTGATCTGCGCCC	0.692957742619322	moderate	c.-292	c.-166	.	.	.	.	.
chr9	127854642	G	A	ENST00000373203.9:reverse; ENST00000373203.9:reverse	NM_001114753.3; NM_001114753.3	ENG	.	c.-287C>T; c.-287C>T	UTR5	uTIS	out_of_frame_(2); out_of_frame_(1)	overlapping_6.28%; not_overlapping	0.208206686930091	137/658; 41/658	414; 126	ENST00000373203.9:reverse,c.-287C>T,287,out_of_frame_(2),TTG,UTR5,non_canonical_TIS,non_canonical_TIS(CTG)_to_non_canonical_TIS(TTG),overlapping_6.28%,137[/658](aa),414,127854355,127854642,127843188,127815682,CAGCCTTCATTTGCGCCCTGGGG,0.419542252429974,c.-287,c.125,weak,TGA,NM_001114753.3|ENST00000373203.9:reverse,c.-287C>T,289,out_of_frame_(1),ATT,UTR5,non_canonical_TIS,non_canonical_TIS(ATC)_to_n…	NA	NA	NA	NA	NA	NA	NA	NA	TTG; ATT	non_canonical_TIS; non_canonical_TIS	non_canonical_TIS(CTG)_to_non_canonical_TIS(TTG); non_canonical_TIS(ATC)_to_non_canonical_TIS(ATT)	TGA; TGA	127854355; 127854355	127815682; 127815682	127854642; 127854644	127843188; 127854521	CAGCCTTCATTTGCGCCCTGGGG; CACAGCCTTCATTTGCGCCCTGG	0.419542252429974; 0.593896709770548	weak; weak	c.-287; c.-289	c.125; c.-166	.	.	.	.	.
chr9	127854642	G	C	ENST00000373203.9:reverse; ENST00000373203.9:reverse	NM_001114753.3; NM_001114753.3	ENG	.	c.-287C>G; c.-287C>G	UTR5	uTIS	out_of_frame_(1); out_of_frame_(2)	not_overlapping; overlapping_6.28%	0.208206686930091	41/658; 137/658	126; 414	ENST00000373203.9:reverse,c.-287C>G,289,out_of_frame_(1),ATG,UTR5,canonical_TIS,non_canonical_TIS(ATC)_to_canonical_TIS(ATG),not_overlapping,41[/658](aa),126,127854355,127854644,127854521,127815682,CACAGCCTTCATGTGCGCCCTGG,0.593896709770548,c.-289,c.-166,moderate,TGA,NM_001114753.3|ENST00000373203.9:reverse,c.-287C>G,287,out_of_frame_(2),GTG,UTR5,non_canonical_TIS,non_canonical_TIS(CTG)_to_non_can…	NA	NA	NA	NA	NA	NA	NA	NA	ATG; GTG	canonical_TIS; non_canonical_TIS	non_canonical_TIS(ATC)_to_canonical_TIS(ATG); non_canonical_TIS(CTG)_to_non_canonical_TIS(GTG)	TGA; TGA	127854355; 127854355	127815682; 127815682	127854644; 127854642	127854521; 127843188	CACAGCCTTCATGTGCGCCCTGG; CAGCCTTCATGTGCGCCCTGGGG	0.593896709770548; 0.419542252429974	weak; weak	c.-289; c.-287	c.-166; c.125	.	.	.	.	.
chr9	127854642	G	T	ENST00000373203.9:reverse; ENST00000373203.9:reverse	NM_001114753.3; NM_001114753.3	ENG	.	c.-287C>A; c.-287C>A	UTR5	uTIS	out_of_frame_(2); out_of_frame_(1)	overlapping_6.28%; not_overlapping	0.208206686930091	137/658; 41/658	414; 126	ENST00000373203.9:reverse,c.-287C>A,287,out_of_frame_(2),ATG,UTR5,canonical_TIS,non_canonical_TIS(CTG)_to_canonical_TIS(ATG),overlapping_6.28%,137[/658](aa),414,127854355,127854642,127843188,127815682,CAGCCTTCATATGCGCCCTGGGG,0.419542252429974,c.-287,c.125,weak,TGA,NM_001114753.3|ENST00000373203.9:reverse,c.-287C>A,289,out_of_frame_(1),ATA,UTR5,non_canonical_TIS,non_canonical_TIS(ATC)_to_non_canon…	NA	NA	NA	NA	NA	NA	NA	NA	ATG; ATA	canonical_TIS; non_canonical_TIS	non_canonical_TIS(CTG)_to_canonical_TIS(ATG); non_canonical_TIS(ATC)_to_non_canonical_TIS(ATA)	TGA; TGA	127854355; 127854355	127815682; 127815682	127854642; 127854644	127843188; 127854521	CAGCCTTCATATGCGCCCTGGGG; CACAGCCTTCATATGCGCCCTGG	0.419542252429974; 0.593896709770548	weak; weak	c.-287; c.-289	c.125; c.-166	.	.	.	.	.
chr9	127854640	C	T	ENST00000373203.9:reverse	NM_001114753.3	ENG	.	c.-285G>A	UTR5	uTIS	in_frame	elongated_CDS	1.14437689969605	753/658	2262	ENST00000373203.9:reverse,c.-285G>A,285,in_frame,ACG,UTR5,non_canonical_TIS,non_TIS(GCG)_to_non_canonical_TIS(ACG),elongated_CDS,753[/658](aa),2262,127854355,127854640,127815684,127815682,GCCTTCATCTACGCCCTGGGGCC,0.453345072014977,c.-285,c.1975,weak,TAG,NM_001114753.3	NA	NA	NA	NA	NA	NA	NA	NA	ACG	non_canonical_TIS	non_TIS(GCG)_to_non_canonical_TIS(ACG)	TAG	127854355	127815682	127854640	127815684	GCCTTCATCTACGCCCTGGGGCC	0.453345072014977	weak	c.-285	c.1975	.	.	.	.	.
chr9	127854639	G	A	ENST00000373203.9:reverse	NM_001114753.3	ENG	rs983186962	c.-284C>T	UTR5	uTIS	in_frame	elongated_CDS	1.14437689969605	753/658	2262	ENST00000373203.9:reverse,c.-284C>T,285,in_frame,GTG,UTR5,non_canonical_TIS,non_TIS(GCG)_to_non_canonical_TIS(GTG),elongated_CDS,753[/658](aa),2262,127854355,127854640,127815684,127815682,GCCTTCATCTGTGCCCTGGGGCC,0.453345072014977,c.-285,c.1975,weak,TAG,NM_001114753.3	NA	NA	NA	NA	NA	NA	NA	NA	GTG	non_canonical_TIS	non_TIS(GCG)_to_non_canonical_TIS(GTG)	TAG	127854355	127815682	127854640	127815684	GCCTTCATCTGTGCCCTGGGGCC	0.453345072014977	weak	c.-285	c.1975	1.314e-05	6.544e-05	.	.	.
chr9	127854635	G	A	ENST00000373203.9:reverse	NM_001114753.3	ENG	.	c.-280C>T	UTR5	uTIS	out_of_frame_(1)	not_overlapping	0.0577507598784195	38/658	117	ENST00000373203.9:reverse,c.-280C>T,280,out_of_frame_(1),TTG,UTR5,non_canonical_TIS,non_canonical_TIS(CTG)_to_non_canonical_TIS(TTG),not_overlapping,38[/658](aa),117,127854355,127854635,127854521,127815682,CATCTGCGCCTTGGGGCCAGGAC,0.79999999571831,c.-280,c.-166,moderate,TGA,NM_001114753.3	NA	NA	NA	NA	NA	NA	NA	NA	TTG	non_canonical_TIS	non_canonical_TIS(CTG)_to_non_canonical_TIS(TTG)	TGA	127854355	127815682	127854635	127854521	CATCTGCGCCTTGGGGCCAGGAC	0.79999999571831	strong	c.-280	c.-166	.	.	.	.	.
chr9	127854635	G	C	ENST00000373203.9:reverse	NM_001114753.3	ENG	.	c.-280C>G	UTR5	uTIS	out_of_frame_(1)	not_overlapping	0.0577507598784195	38/658	117	ENST00000373203.9:reverse,c.-280C>G,280,out_of_frame_(1),GTG,UTR5,non_canonical_TIS,non_canonical_TIS(CTG)_to_non_canonical_TIS(GTG),not_overlapping,38[/658](aa),117,127854355,127854635,127854521,127815682,CATCTGCGCCGTGGGGCCAGGAC,0.79999999571831,c.-280,c.-166,moderate,TGA,NM_001114753.3	NA	NA	NA	NA	NA	NA	NA	NA	GTG	non_canonical_TIS	non_canonical_TIS(CTG)_to_non_canonical_TIS(GTG)	TGA	127854355	127815682	127854635	127854521	CATCTGCGCCGTGGGGCCAGGAC	0.79999999571831	strong	c.-280	c.-166	.	.	.	.	.
chr9	127854635	G	T	ENST00000373203.9:reverse	NM_001114753.3	ENG	.	c.-280C>A	UTR5	uTIS	out_of_frame_(1)	not_overlapping	0.0577507598784195	38/658	117	ENST00000373203.9:reverse,c.-280C>A,280,out_of_frame_(1),ATG,UTR5,canonical_TIS,non_canonical_TIS(CTG)_to_canonical_TIS(ATG),not_overlapping,38[/658](aa),117,127854355,127854635,127854521,127815682,CATCTGCGCCATGGGGCCAGGAC,0.79999999571831,c.-280,c.-166,moderate,TGA,NM_001114753.3	NA	NA	NA	NA	NA	NA	NA	NA	ATG	canonical_TIS	non_canonical_TIS(CTG)_to_canonical_TIS(ATG)	TGA	127854355	127815682	127854635	127854521	CATCTGCGCCATGGGGCCAGGAC	0.79999999571831	strong	c.-280	c.-166	.	.	.	.	.
chr9	127854634	A	T	ENST00000373203.9:reverse	NM_001114753.3	ENG	.	c.-279T>A	UTR5	uTIS	in_frame	elongated_CDS	1.14133738601824	751/658	2256	ENST00000373203.9:reverse,c.-279T>A,279,in_frame,AGG,UTR5,non_canonical_TIS,non_TIS(TGG)_to_non_canonical_TIS(AGG),elongated_CDS,751[/658](aa),2256,127854355,127854634,127815684,127815682,ATCTGCGCCCAGGGGCCAGGACT,0.67605633282682,c.-279,c.1975,weak,TAG,NM_001114753.3	NA	NA	NA	NA	NA	NA	NA	NA	AGG	non_canonical_TIS	non_TIS(TGG)_to_non_canonical_TIS(AGG)	TAG	127854355	127815682	127854634	127815684	ATCTGCGCCCAGGGGCCAGGACT	0.67605633282682	moderate	c.-279	c.1975	.	.	.	.	.
chr9	127854633	C	A	ENST00000373203.9:reverse	NM_001114753.3	ENG	.	c.-278G>T	UTR5	uTIS	in_frame	elongated_CDS	1.14133738601824	751/658	2256	ENST00000373203.9:reverse,c.-278G>T,279,in_frame,TTG,UTR5,non_canonical_TIS,non_TIS(TGG)_to_non_canonical_TIS(TTG),elongated_CDS,751[/658](aa),2256,127854355,127854634,127815684,127815682,ATCTGCGCCCTTGGGCCAGGACT,0.67605633282682,c.-279,c.1975,weak,TAG,NM_001114753.3	NA	NA	NA	NA	NA	NA	NA	NA	TTG	non_canonical_TIS	non_TIS(TGG)_to_non_canonical_TIS(TTG)	TAG	127854355	127815682	127854634	127815684	ATCTGCGCCCTTGGGCCAGGACT	0.67605633282682	moderate	c.-279	c.1975	.	.	.	.	.
chr9	127854633	C	T	ENST00000373203.9:reverse	NM_001114753.3	ENG	.	c.-278G>A	UTR5	uTIS	out_of_frame_(2)	overlapping_6.28%	0.203647416413374	134/658	405	ENST00000373203.9:reverse,c.-278G>A,278,out_of_frame_(2),AGG,UTR5,non_canonical_TIS,non_TIS(GGG)_to_non_canonical_TIS(AGG),overlapping_6.28%,134[/658](aa),405,127854355,127854633,127843188,127815682,TCTGCGCCCTAGGGCCAGGACTG,0.590966671613089,c.-278,c.125,weak,TGA,NM_001114753.3	NA	NA	NA	NA	NA	NA	NA	NA	AGG	non_canonical_TIS	non_TIS(GGG)_to_non_canonical_TIS(AGG)	TGA	127854355	127815682	127854633	127843188	TCTGCGCCCTAGGGCCAGGACTG	0.590966671613089	moderate	c.-278	c.125	.	.	.	.	.
chr9	127854632	C	A	ENST00000373203.9:reverse	NM_001114753.3	ENG	.	c.-277G>T	UTR5	uTIS	out_of_frame_(2)	overlapping_6.28%	0.203647416413374	134/658	405	ENST00000373203.9:reverse,c.-277G>T,278,out_of_frame_(2),GTG,UTR5,non_canonical_TIS,non_TIS(GGG)_to_non_canonical_TIS(GTG),overlapping_6.28%,134[/658](aa),405,127854355,127854633,127843188,127815682,TCTGCGCCCTGTGGCCAGGACTG,0.590966671613089,c.-278,c.125,weak,TGA,NM_001114753.3	NA	NA	NA	NA	NA	NA	NA	NA	GTG	non_canonical_TIS	non_TIS(GGG)_to_non_canonical_TIS(GTG)	TGA	127854355	127815682	127854633	127843188	TCTGCGCCCTGTGGCCAGGACTG	0.590966671613089	moderate	c.-278	c.125	.	.	.	.	.
chr9	127854632	C	T	ENST00000373203.9:reverse	NM_001114753.3	ENG	.	c.-277G>A	UTR5	uTIS	out_of_frame_(1)	not_overlapping	0.0562310030395137	37/658	114	ENST00000373203.9:reverse,c.-277G>A,277,out_of_frame_(1),AGG,UTR5,non_canonical_TIS,non_TIS(GGG)_to_non_canonical_TIS(AGG),not_overlapping,37[/658](aa),114,127854355,127854632,127854521,127815682,CTGCGCCCTGAGGCCAGGACTGC,0.538028168019044,c.-277,c.-166,moderate,TGA,NM_001114753.3	NA	NA	NA	NA	NA	NA	NA	NA	AGG	non_canonical_TIS	non_TIS(GGG)_to_non_canonical_TIS(AGG)	TGA	127854355	127815682	127854632	127854521	CTGCGCCCTGAGGCCAGGACTGC	0.538028168019044	weak	c.-277	c.-166	.	.	.	.	.
chr9	127854631	C	A	ENST00000373203.9:reverse	NM_001114753.3	ENG	.	c.-276G>T	UTR5	uTIS	out_of_frame_(1)	not_overlapping	0.0562310030395137	37/658	114	ENST00000373203.9:reverse,c.-276G>T,277,out_of_frame_(1),GTG,UTR5,non_canonical_TIS,non_TIS(GGG)_to_non_canonical_TIS(GTG),not_overlapping,37[/658](aa),114,127854355,127854632,127854521,127815682,CTGCGCCCTGGTGCCAGGACTGC,0.538028168019044,c.-277,c.-166,moderate,TGA,NM_001114753.3	NA	NA	NA	NA	NA	NA	NA	NA	GTG	non_canonical_TIS	non_TIS(GGG)_to_non_canonical_TIS(GTG)	TGA	127854355	127815682	127854632	127854521	CTGCGCCCTGGTGCCAGGACTGC	0.538028168019044	weak	c.-277	c.-166	.	.	.	.	.
chr9	127854628	G	T	ENST00000373203.9:reverse	NM_001114753.3	ENG	.	c.-273C>A	UTR5	uTIS	in_frame	elongated_CDS	1.13829787234043	749/658	2250	ENST00000373203.9:reverse,c.-273C>A,273,in_frame,AAG,UTR5,non_canonical_TIS,non_TIS(CAG)_to_non_canonical_TIS(AAG),elongated_CDS,749[/658](aa),2250,127854355,127854628,127815684,127815682,GCCCTGGGGCAAGGACTGCTGCT,0.760387321367487,c.-273,c.1975,moderate,TAG,NM_001114753.3	NA	NA	NA	NA	NA	NA	NA	NA	AAG	non_canonical_TIS	non_TIS(CAG)_to_non_canonical_TIS(AAG)	TAG	127854355	127815682	127854628	127815684	GCCCTGGGGCAAGGACTGCTGCT	0.760387321367487	strong	c.-273	c.1975	.	.	.	.	.
chr9	127854627	T	A	ENST00000373203.9:reverse	NM_001114753.3	ENG	.	c.-272A>T	UTR5	uTIS	in_frame	elongated_CDS	1.13829787234043	749/658	2250	ENST00000373203.9:reverse,c.-272A>T,273,in_frame,CTG,UTR5,non_canonical_TIS,non_TIS(CAG)_to_non_canonical_TIS(CTG),elongated_CDS,749[/658](aa),2250,127854355,127854628,127815684,127815682,GCCCTGGGGCCTGGACTGCTGCT,0.760387321367487,c.-273,c.1975,moderate,TAG,NM_001114753.3	NA	NA	NA	NA	NA	NA	NA	NA	CTG	non_canonical_TIS	non_TIS(CAG)_to_non_canonical_TIS(CTG)	TAG	127854355	127815682	127854628	127815684	GCCCTGGGGCCTGGACTGCTGCT	0.760387321367487	strong	c.-273	c.1975	.	.	.	.	.
chr9	127854626	C	A	ENST00000373203.9:reverse	NM_001114753.3	ENG	.	c.-271G>T	UTR5	uTIS	out_of_frame_(2)	overlapping_6.28%	0.200607902735562	132/658	399	ENST00000373203.9:reverse,c.-271G>T,272,out_of_frame_(2),ATG,UTR5,canonical_TIS,non_canonical_TIS(AGG)_to_canonical_TIS(ATG),overlapping_6.28%,132[/658](aa),399,127854355,127854627,127843188,127815682,CCCTGGGGCCATGACTGCTGCTG,0.777288728483932,c.-272,c.125,strong,TGA,NM_001114753.3	NA	NA	NA	NA	NA	NA	NA	NA	ATG	canonical_TIS	non_canonical_TIS(AGG)_to_canonical_TIS(ATG)	TGA	127854355	127815682	127854627	127843188	CCCTGGGGCCATGACTGCTGCTG	0.777288728483932	moderate	c.-272	c.125	.	.	.	.	.
chr9	127854626	C	G	ENST00000373203.9:reverse	NM_001114753.3	ENG	.	c.-271G>C	UTR5	uTIS	out_of_frame_(2)	overlapping_6.28%	0.200607902735562	132/658	399	ENST00000373203.9:reverse,c.-271G>C,272,out_of_frame_(2),ACG,UTR5,non_canonical_TIS,non_canonical_TIS(AGG)_to_non_canonical_TIS(ACG),overlapping_6.28%,132[/658](aa),399,127854355,127854627,127843188,127815682,CCCTGGGGCCACGACTGCTGCTG,0.777288728483932,c.-272,c.125,strong,TGA,NM_001114753.3	NA	NA	NA	NA	NA	NA	NA	NA	ACG	non_canonical_TIS	non_canonical_TIS(AGG)_to_non_canonical_TIS(ACG)	TGA	127854355	127815682	127854627	127843188	CCCTGGGGCCACGACTGCTGCTG	0.777288728483932	moderate	c.-272	c.125	.	.	.	.	.
chr9	127854626	C	T	ENST00000373203.9:reverse	NM_001114753.3	ENG	.	c.-271G>A	UTR5	uTIS	out_of_frame_(2)	overlapping_6.28%	0.200607902735562	132/658	399	ENST00000373203.9:reverse,c.-271G>A,272,out_of_frame_(2),AAG,UTR5,non_canonical_TIS,non_canonical_TIS(AGG)_to_non_canonical_TIS(AAG),overlapping_6.28%,132[/658](aa),399,127854355,127854627,127843188,127815682,CCCTGGGGCCAAGACTGCTGCTG,0.777288728483932,c.-272,c.125,strong,TGA,NM_001114753.3	NA	NA	NA	NA	NA	NA	NA	NA	AAG	non_canonical_TIS	non_canonical_TIS(AGG)_to_non_canonical_TIS(AAG)	TGA	127854355	127815682	127854627	127843188	CCCTGGGGCCAAGACTGCTGCTG	0.777288728483932	moderate	c.-272	c.125	.	.	.	.	.
chr9	127854623	G	A	ENST00000373203.9:reverse; ENST00000373203.9:reverse	NM_001114753.3; NM_001114753.3	ENG	.	c.-268C>T; c.-268C>T	UTR5	uTIS	out_of_frame_(1); out_of_frame_(2)	not_overlapping; overlapping_6.28%	0.199088145896657	34/658; 131/658	105; 396	ENST00000373203.9:reverse,c.-268C>T,268,out_of_frame_(1),TTG,UTR5,non_canonical_TIS,non_canonical_TIS(CTG)_to_non_canonical_TIS(TTG),not_overlapping,34[/658](aa),105,127854355,127854623,127854521,127815682,GGGGCCAGGATTGCTGCTGTCAC,0.588732394720492,c.-268,c.-166,moderate,TGA,NM_001114753.3|ENST00000373203.9:reverse,c.-268C>T,269,out_of_frame_(2),ATT,UTR5,non_canonical_TIS,non_TIS(ACT)_to_non_canon…	NA	NA	NA	NA	NA	NA	NA	NA	TTG; ATT	non_canonical_TIS; non_canonical_TIS	non_canonical_TIS(CTG)_to_non_canonical_TIS(TTG); non_TIS(ACT)_to_non_canonical_TIS(ATT)	TGA; TGA	127854355; 127854355	127815682; 127815682	127854623; 127854624	127854521; 127843188	GGGGCCAGGATTGCTGCTGTCAC; TGGGGCCAGGATTGCTGCTGTCA	0.588732394720492; 0.858978872246281	moderate; strong	c.-268; c.-269	c.-166; c.125	.	.	.	.	.
chr9	127854623	G	C	ENST00000373203.9:reverse	NM_001114753.3	ENG	.	c.-268C>G	UTR5	uTIS	out_of_frame_(1)	not_overlapping	0.0516717325227964	34/658	105	ENST00000373203.9:reverse,c.-268C>G,268,out_of_frame_(1),GTG,UTR5,non_canonical_TIS,non_canonical_TIS(CTG)_to_non_canonical_TIS(GTG),not_overlapping,34[/658](aa),105,127854355,127854623,127854521,127815682,GGGGCCAGGAGTGCTGCTGTCAC,0.588732394720492,c.-268,c.-166,moderate,TGA,NM_001114753.3	NA	NA	NA	NA	NA	NA	NA	NA	GTG	non_canonical_TIS	non_canonical_TIS(CTG)_to_non_canonical_TIS(GTG)	TGA	127854355	127815682	127854623	127854521	GGGGCCAGGAGTGCTGCTGTCAC	0.588732394720492	moderate	c.-268	c.-166	.	.	.	.	.
chr9	127854623	G	T	ENST00000373203.9:reverse	NM_001114753.3	ENG	.	c.-268C>A	UTR5	uTIS	out_of_frame_(1)	not_overlapping	0.0516717325227964	34/658	105	ENST00000373203.9:reverse,c.-268C>A,268,out_of_frame_(1),ATG,UTR5,canonical_TIS,non_canonical_TIS(CTG)_to_canonical_TIS(ATG),not_overlapping,34[/658](aa),105,127854355,127854623,127854521,127815682,GGGGCCAGGAATGCTGCTGTCAC,0.588732394720492,c.-268,c.-166,moderate,TGA,NM_001114753.3	NA	NA	NA	NA	NA	NA	NA	NA	ATG	canonical_TIS	non_canonical_TIS(CTG)_to_canonical_TIS(ATG)	TGA	127854355	127815682	127854623	127854521	GGGGCCAGGAATGCTGCTGTCAC	0.588732394720492	moderate	c.-268	c.-166	.	.	.	.	.
chr9	127854622	A	C	ENST00000373203.9:reverse	NM_001114753.3	ENG	.	c.-267T>G	UTR5	uTIS	out_of_frame_(2)	overlapping_6.28%	0.199088145896657	131/658	396	ENST00000373203.9:reverse,c.-267T>G,269,out_of_frame_(2),ACG,UTR5,non_canonical_TIS,non_TIS(ACT)_to_non_canonical_TIS(ACG),overlapping_6.28%,131[/658](aa),396,127854355,127854624,127843188,127815682,TGGGGCCAGGACGGCTGCTGTCA,0.858978872246281,c.-269,c.125,strong,TGA,NM_001114753.3	NA	NA	NA	NA	NA	NA	NA	NA	ACG	non_canonical_TIS	non_TIS(ACT)_to_non_canonical_TIS(ACG)	TGA	127854355	127815682	127854624	127843188	TGGGGCCAGGACGGCTGCTGTCA	0.858978872246281	strong	c.-269	c.125	.	.	.	.	.
chr9	127854620	G	A	ENST00000373203.9:reverse	NM_001114753.3	ENG	.	c.-265C>T	UTR5	uTIS	out_of_frame_(1)	not_overlapping	0.0501519756838906	33/658	102	ENST00000373203.9:reverse,c.-265C>T,265,out_of_frame_(1),TTG,UTR5,non_canonical_TIS,non_canonical_TIS(CTG)_to_non_canonical_TIS(TTG),not_overlapping,33[/658](aa),102,127854355,127854620,127854521,127815682,GCCAGGACTGTTGCTGTCACTGC,0.489964786095914,c.-265,c.-166,weak,TGA,NM_001114753.3	NA	NA	NA	NA	NA	NA	NA	NA	TTG	non_canonical_TIS	non_canonical_TIS(CTG)_to_non_canonical_TIS(TTG)	TGA	127854355	127815682	127854620	127854521	GCCAGGACTGTTGCTGTCACTGC	0.489964786095914	weak	c.-265	c.-166	.	.	.	.	.
chr9	127854620	G	C	ENST00000373203.9:reverse	NM_001114753.3	ENG	.	c.-265C>G	UTR5	uTIS	out_of_frame_(1)	not_overlapping	0.0501519756838906	33/658	102	ENST00000373203.9:reverse,c.-265C>G,265,out_of_frame_(1),GTG,UTR5,non_canonical_TIS,non_canonical_TIS(CTG)_to_non_canonical_TIS(GTG),not_overlapping,33[/658](aa),102,127854355,127854620,127854521,127815682,GCCAGGACTGGTGCTGTCACTGC,0.489964786095914,c.-265,c.-166,weak,TGA,NM_001114753.3	NA	NA	NA	NA	NA	NA	NA	NA	GTG	non_canonical_TIS	non_canonical_TIS(CTG)_to_non_canonical_TIS(GTG)	TGA	127854355	127815682	127854620	127854521	GCCAGGACTGGTGCTGTCACTGC	0.489964786095914	weak	c.-265	c.-166	.	.	.	.	.
chr9	127854620	G	T	ENST00000373203.9:reverse	NM_001114753.3	ENG	.	c.-265C>A	UTR5	uTIS	out_of_frame_(1)	not_overlapping	0.0501519756838906	33/658	102	ENST00000373203.9:reverse,c.-265C>A,265,out_of_frame_(1),ATG,UTR5,canonical_TIS,non_canonical_TIS(CTG)_to_canonical_TIS(ATG),not_overlapping,33[/658](aa),102,127854355,127854620,127854521,127815682,GCCAGGACTGATGCTGTCACTGC,0.489964786095914,c.-265,c.-166,weak,TGA,NM_001114753.3	NA	NA	NA	NA	NA	NA	NA	NA	ATG	canonical_TIS	non_canonical_TIS(CTG)_to_canonical_TIS(ATG)	TGA	127854355	127815682	127854620	127854521	GCCAGGACTGATGCTGTCACTGC	0.489964786095914	weak	c.-265	c.-166	.	.	.	.	.
chr9	127854617	G	A	ENST00000373203.9:reverse	NM_001114753.3	ENG	.	c.-262C>T	UTR5	uTIS	out_of_frame_(1)	not_overlapping	0.0486322188449848	32/658	99	ENST00000373203.9:reverse,c.-262C>T,262,out_of_frame_(1),TTG,UTR5,non_canonical_TIS,non_canonical_TIS(CTG)_to_non_canonical_TIS(TTG),not_overlapping,32[/658](aa),99,127854355,127854617,127854521,127815682,AGGACTGCTGTTGTCACTGCCAT,0.486854453995504,c.-262,c.-166,weak,TGA,NM_001114753.3	NA	NA	NA	NA	NA	NA	NA	NA	TTG	non_canonical_TIS	non_canonical_TIS(CTG)_to_non_canonical_TIS(TTG)	TGA	127854355	127815682	127854617	127854521	AGGACTGCTGTTGTCACTGCCAT	0.486854453995504	weak	c.-262	c.-166	.	.	.	.	.
chr9	127854617	G	C	ENST00000373203.9:reverse	NM_001114753.3	ENG	.	c.-262C>G	UTR5	uTIS	out_of_frame_(1)	not_overlapping	0.0486322188449848	32/658	99	ENST00000373203.9:reverse,c.-262C>G,262,out_of_frame_(1),GTG,UTR5,non_canonical_TIS,non_canonical_TIS(CTG)_to_non_canonical_TIS(GTG),not_overlapping,32[/658](aa),99,127854355,127854617,127854521,127815682,AGGACTGCTGGTGTCACTGCCAT,0.486854453995504,c.-262,c.-166,weak,TGA,NM_001114753.3	NA	NA	NA	NA	NA	NA	NA	NA	GTG	non_canonical_TIS	non_canonical_TIS(CTG)_to_non_canonical_TIS(GTG)	TGA	127854355	127815682	127854617	127854521	AGGACTGCTGGTGTCACTGCCAT	0.486854453995504	weak	c.-262	c.-166	.	.	.	.	.
chr9	127854617	G	T	ENST00000373203.9:reverse	NM_001114753.3	ENG	.	c.-262C>A	UTR5	uTIS	out_of_frame_(1)	not_overlapping	0.0486322188449848	32/658	99	ENST00000373203.9:reverse,c.-262C>A,262,out_of_frame_(1),ATG,UTR5,canonical_TIS,non_canonical_TIS(CTG)_to_canonical_TIS(ATG),not_overlapping,32[/658](aa),99,127854355,127854617,127854521,127815682,AGGACTGCTGATGTCACTGCCAT,0.486854453995504,c.-262,c.-166,weak,TGA,NM_001114753.3	NA	NA	NA	NA	NA	NA	NA	NA	ATG	canonical_TIS	non_canonical_TIS(CTG)_to_canonical_TIS(ATG)	TGA	127854355	127815682	127854617	127854521	AGGACTGCTGATGTCACTGCCAT	0.486854453995504	weak	c.-262	c.-166	.	.	.	.	.
chr9	127854615	C	T	ENST00000373203.9:reverse	NM_001114753.3	ENG	.	c.-260G>A	UTR5	uTIS	out_of_frame_(2)	overlapping_6.28%	0.194528875379939	128/658	387	ENST00000373203.9:reverse,c.-260G>A,260,out_of_frame_(2),ATC,UTR5,non_canonical_TIS,non_TIS(GTC)_to_non_canonical_TIS(ATC),overlapping_6.28%,128[/658](aa),387,127854355,127854615,127843188,127815682,GACTGCTGCTATCACTGCCATCC,0.650528165744396,c.-260,c.125,strong,TGA,NM_001114753.3	NA	NA	NA	NA	NA	NA	NA	NA	ATC	non_canonical_TIS	non_TIS(GTC)_to_non_canonical_TIS(ATC)	TGA	127854355	127815682	127854615	127843188	GACTGCTGCTATCACTGCCATCC	0.650528165744396	moderate	c.-260	c.125	.	.	.	.	.
chr9	127854613	G	C	ENST00000373203.9:reverse	NM_001114753.3	ENG	.	c.-258C>G	UTR5	uTIS	out_of_frame_(2)	overlapping_6.28%	0.194528875379939	128/658	387	ENST00000373203.9:reverse,c.-258C>G,260,out_of_frame_(2),GTG,UTR5,non_canonical_TIS,non_TIS(GTC)_to_non_canonical_TIS(GTG),overlapping_6.28%,128[/658](aa),387,127854355,127854615,127843188,127815682,GACTGCTGCTGTGACTGCCATCC,0.650528165744396,c.-260,c.125,strong,TGA,NM_001114753.3	NA	NA	NA	NA	NA	NA	NA	NA	GTG	non_canonical_TIS	non_TIS(GTC)_to_non_canonical_TIS(GTG)	TGA	127854355	127815682	127854615	127843188	GACTGCTGCTGTGACTGCCATCC	0.650528165744396	moderate	c.-260	c.125	.	.	.	.	.
chr9	127854611	G	A	ENST00000373203.9:reverse; ENST00000373203.9:reverse	NM_001114753.3; NM_001114753.3	ENG	.	c.-256C>T; c.-256C>T	UTR5	uTIS	out_of_frame_(1); out_of_frame_(2)	not_overlapping; overlapping_6.28%	0.193009118541033	30/658; 127/658	93; 384	ENST00000373203.9:reverse,c.-256C>T,256,out_of_frame_(1),TTG,UTR5,non_canonical_TIS,non_canonical_TIS(CTG)_to_non_canonical_TIS(TTG),not_overlapping,30[/658](aa),93,127854355,127854611,127854521,127815682,GCTGCTGTCATTGCCATCCATTG,0.484330983723765,c.-256,c.-166,weak,TGA,NM_001114753.3|ENST00000373203.9:reverse,c.-256C>T,257,out_of_frame_(2),ATT,UTR5,non_canonical_TIS,non_TIS(ACT)_to_non_canonical_…	NA	NA	NA	NA	NA	NA	NA	NA	TTG; ATT	non_canonical_TIS; non_canonical_TIS	non_canonical_TIS(CTG)_to_non_canonical_TIS(TTG); non_TIS(ACT)_to_non_canonical_TIS(ATT)	TGA; TGA	127854355; 127854355	127815682; 127815682	127854611; 127854612	127854521; 127843188	GCTGCTGTCATTGCCATCCATTG; TGCTGCTGTCATTGCCATCCATT	0.484330983723765; 0.782515965646416	weak; strong	c.-256; c.-257	c.-166; c.125	.	.	.	.	.
chr9	127854611	G	C	ENST00000373203.9:reverse	NM_001114753.3	ENG	.	c.-256C>G	UTR5	uTIS	out_of_frame_(1)	not_overlapping	0.0455927051671733	30/658	93	ENST00000373203.9:reverse,c.-256C>G,256,out_of_frame_(1),GTG,UTR5,non_canonical_TIS,non_canonical_TIS(CTG)_to_non_canonical_TIS(GTG),not_overlapping,30[/658](aa),93,127854355,127854611,127854521,127815682,GCTGCTGTCAGTGCCATCCATTG,0.484330983723765,c.-256,c.-166,weak,TGA,NM_001114753.3	NA	NA	NA	NA	NA	NA	NA	NA	GTG	non_canonical_TIS	non_canonical_TIS(CTG)_to_non_canonical_TIS(GTG)	TGA	127854355	127815682	127854611	127854521	GCTGCTGTCAGTGCCATCCATTG	0.484330983723765	weak	c.-256	c.-166	.	.	.	.	.
chr9	127854611	G	T	ENST00000373203.9:reverse	NM_001114753.3	ENG	.	c.-256C>A	UTR5	uTIS	out_of_frame_(1)	not_overlapping	0.0455927051671733	30/658	93	ENST00000373203.9:reverse,c.-256C>A,256,out_of_frame_(1),ATG,UTR5,canonical_TIS,non_canonical_TIS(CTG)_to_canonical_TIS(ATG),not_overlapping,30[/658](aa),93,127854355,127854611,127854521,127815682,GCTGCTGTCAATGCCATCCATTG,0.484330983723765,c.-256,c.-166,weak,TGA,NM_001114753.3	NA	NA	NA	NA	NA	NA	NA	NA	ATG	canonical_TIS	non_canonical_TIS(CTG)_to_canonical_TIS(ATG)	TGA	127854355	127815682	127854611	127854521	GCTGCTGTCAATGCCATCCATTG	0.484330983723765	weak	c.-256	c.-166	.	.	.	.	.
chr9	127854610	A	C	ENST00000373203.9:reverse	NM_001114753.3	ENG	.	c.-255T>G	UTR5	uTIS	out_of_frame_(2)	overlapping_6.28%	0.193009118541033	127/658	384	ENST00000373203.9:reverse,c.-255T>G,257,out_of_frame_(2),ACG,UTR5,non_canonical_TIS,non_TIS(ACT)_to_non_canonical_TIS(ACG),overlapping_6.28%,127[/658](aa),384,127854355,127854612,127843188,127815682,TGCTGCTGTCACGGCCATCCATT,0.782515965646416,c.-257,c.125,moderate,TGA,NM_001114753.3	NA	NA	NA	NA	NA	NA	NA	NA	ACG	non_canonical_TIS	non_TIS(ACT)_to_non_canonical_TIS(ACG)	TGA	127854355	127815682	127854612	127843188	TGCTGCTGTCACGGCCATCCATT	0.782515965646416	strong	c.-257	c.125	.	.	.	.	.
chr9	127854604	G	A	ENST00000373203.9:reverse	NM_001114753.3	ENG	.	c.-249C>T	UTR5	uTIS	out_of_frame_(2)	overlapping_6.28%	0.189969604863222	125/658	378	ENST00000373203.9:reverse,c.-249C>T,251,out_of_frame_(2),ATT,UTR5,non_canonical_TIS,non_canonical_TIS(ATC)_to_non_canonical_TIS(ATT),overlapping_6.28%,125[/658](aa),378,127854355,127854606,127843188,127815682,TGTCACTGCCATTCATTGGAGCC,0.670246480737056,c.-251,c.125,moderate,TGA,NM_001114753.3	NA	NA	NA	NA	NA	NA	NA	NA	ATT	non_canonical_TIS	non_canonical_TIS(ATC)_to_non_canonical_TIS(ATT)	TGA	127854355	127815682	127854606	127843188	TGTCACTGCCATTCATTGGAGCC	0.670246480737056	moderate	c.-251	c.125	.	.	.	.	.
chr9	127854604	G	C	ENST00000373203.9:reverse	NM_001114753.3	ENG	.	c.-249C>G	UTR5	uTIS	out_of_frame_(2)	overlapping_6.28%	0.189969604863222	125/658	378	ENST00000373203.9:reverse,c.-249C>G,251,out_of_frame_(2),ATG,UTR5,canonical_TIS,non_canonical_TIS(ATC)_to_canonical_TIS(ATG),overlapping_6.28%,125[/658](aa),378,127854355,127854606,127843188,127815682,TGTCACTGCCATGCATTGGAGCC,0.670246480737056,c.-251,c.125,moderate,TGA,NM_001114753.3	NA	NA	NA	NA	NA	NA	NA	NA	ATG	canonical_TIS	non_canonical_TIS(ATC)_to_canonical_TIS(ATG)	TGA	127854355	127815682	127854606	127843188	TGTCACTGCCATGCATTGGAGCC	0.670246480737056	moderate	c.-251	c.125	.	.	.	.	.
chr9	127854604	G	T	ENST00000373203.9:reverse	NM_001114753.3	ENG	rs914868382	c.-249C>A	UTR5	uTIS	out_of_frame_(2)	overlapping_6.28%	0.189969604863222	125/658	378	ENST00000373203.9:reverse,c.-249C>A,251,out_of_frame_(2),ATA,UTR5,non_canonical_TIS,non_canonical_TIS(ATC)_to_non_canonical_TIS(ATA),overlapping_6.28%,125[/658](aa),378,127854355,127854606,127843188,127815682,TGTCACTGCCATACATTGGAGCC,0.670246480737056,c.-251,c.125,moderate,TGA,NM_001114753.3	NA	NA	NA	NA	NA	NA	NA	NA	ATA	non_canonical_TIS	non_canonical_TIS(ATC)_to_non_canonical_TIS(ATA)	TGA	127854355	127815682	127854606	127843188	TGTCACTGCCATACATTGGAGCC	0.670246480737056	moderate	c.-251	c.125	6.57e-06	1.47e-05	Telangiectasia,_hereditary_hemorrhagic,_type_1	MONDO:MONDO:0008535,MedGen:C4551861,OMIM:187300	Uncertain_significance
chr9	127854601	A	C	ENST00000373203.9:reverse	NM_001114753.3	ENG	.	c.-246T>G	UTR5	uTIS	in_frame	elongated_CDS	1.12462006079027	740/658	2223	ENST00000373203.9:reverse,c.-246T>G,246,in_frame,GTG,UTR5,non_canonical_TIS,non_canonical_TIS(TTG)_to_non_canonical_TIS(GTG),elongated_CDS,740[/658](aa),2223,127854355,127854601,127815684,127815682,CTGCCATCCAGTGGAGCCCAGCA,0.596830984125174,c.-246,c.1975,weak,TAG,NM_001114753.3	NA	NA	NA	NA	NA	NA	NA	NA	GTG	non_canonical_TIS	non_canonical_TIS(TTG)_to_non_canonical_TIS(GTG)	TAG	127854355	127815682	127854601	127815684	CTGCCATCCAGTGGAGCCCAGCA	0.596830984125174	moderate	c.-246	c.1975	.	.	.	.	.
chr9	127854601	A	G	ENST00000373203.9:reverse	NM_001114753.3	ENG	rs886063478	c.-246T>C	UTR5	uTIS	in_frame	elongated_CDS	1.12462006079027	740/658	2223	ENST00000373203.9:reverse,c.-246T>C,246,in_frame,CTG,UTR5,non_canonical_TIS,non_canonical_TIS(TTG)_to_non_canonical_TIS(CTG),elongated_CDS,740[/658](aa),2223,127854355,127854601,127815684,127815682,CTGCCATCCACTGGAGCCCAGCA,0.596830984125174,c.-246,c.1975,weak,TAG,NM_001114753.3	NA	NA	NA	NA	NA	NA	NA	NA	CTG	non_canonical_TIS	non_canonical_TIS(TTG)_to_non_canonical_TIS(CTG)	TAG	127854355	127815682	127854601	127815684	CTGCCATCCACTGGAGCCCAGCA	0.596830984125174	moderate	c.-246	c.1975	0.0002	0.0006	Telangiectasia,_hereditary_hemorrhagic,_type_1|Juvenile_Polyposis	MONDO:MONDO:0008535,MedGen:C4551861,OMIM:187300|MedGen:CN239474	Uncertain_significance
chr9	127854601	A	T	ENST00000373203.9:reverse	NM_001114753.3	ENG	.	c.-246T>A	UTR5	uTIS	in_frame	elongated_CDS	1.12462006079027	740/658	2223	ENST00000373203.9:reverse,c.-246T>A,246,in_frame,ATG,UTR5,canonical_TIS,non_canonical_TIS(TTG)_to_canonical_TIS(ATG),elongated_CDS,740[/658](aa),2223,127854355,127854601,127815684,127815682,CTGCCATCCAATGGAGCCCAGCA,0.596830984125174,c.-246,c.1975,weak,TAG,NM_001114753.3	NA	NA	NA	NA	NA	NA	NA	NA	ATG	canonical_TIS	non_canonical_TIS(TTG)_to_canonical_TIS(ATG)	TAG	127854355	127815682	127854601	127815684	CTGCCATCCAATGGAGCCCAGCA	0.596830984125174	moderate	c.-246	c.1975	.	.	.	.	.
chr9	127854600	A	C	ENST00000373203.9:reverse	NM_001114753.3	ENG	.	c.-245T>G	UTR5	uTIS	out_of_frame_(1)	not_overlapping	0.0410334346504559	27/658	84	ENST00000373203.9:reverse,c.-245T>G,247,out_of_frame_(1),ATG,UTR5,canonical_TIS,non_canonical_TIS(ATT)_to_canonical_TIS(ATG),not_overlapping,27[/658](aa),84,127854355,127854602,127854521,127815682,ACTGCCATCCATGGGAGCCCAGC,0.658978870640647,c.-247,c.-166,moderate,TGA,NM_001114753.3	NA	NA	NA	NA	NA	NA	NA	NA	ATG	canonical_TIS	non_canonical_TIS(ATT)_to_canonical_TIS(ATG)	TGA	127854355	127815682	127854602	127854521	ACTGCCATCCATGGGAGCCCAGC	0.658978870640647	moderate	c.-247	c.-166	.	.	.	.	.
chr9	127854600	A	G	ENST00000373203.9:reverse	NM_001114753.3	ENG	.	c.-245T>C	UTR5	uTIS	out_of_frame_(1)	not_overlapping	0.0410334346504559	27/658	84	ENST00000373203.9:reverse,c.-245T>C,247,out_of_frame_(1),ATC,UTR5,non_canonical_TIS,non_canonical_TIS(ATT)_to_non_canonical_TIS(ATC),not_overlapping,27[/658](aa),84,127854355,127854602,127854521,127815682,ACTGCCATCCATCGGAGCCCAGC,0.658978870640647,c.-247,c.-166,moderate,TGA,NM_001114753.3	NA	NA	NA	NA	NA	NA	NA	NA	ATC	non_canonical_TIS	non_canonical_TIS(ATT)_to_non_canonical_TIS(ATC)	TGA	127854355	127815682	127854602	127854521	ACTGCCATCCATCGGAGCCCAGC	0.658978870640647	moderate	c.-247	c.-166	.	.	.	.	.
chr9	127854600	A	T	ENST00000373203.9:reverse; ENST00000373203.9:reverse	NM_001114753.3; NM_001114753.3	ENG	.	c.-245T>A; c.-245T>A	UTR5	uTIS	out_of_frame_(2); out_of_frame_(1)	overlapping_6.28%; not_overlapping	0.18693009118541	123/658; 27/658	372; 84	ENST00000373203.9:reverse,c.-245T>A,245,out_of_frame_(2),AGG,UTR5,non_canonical_TIS,non_TIS(TGG)_to_non_canonical_TIS(AGG),overlapping_6.28%,123[/658](aa),372,127854355,127854600,127843188,127815682,TGCCATCCATAGGAGCCCAGCAC,0.467605631677048,c.-245,c.125,weak,TGA,NM_001114753.3|ENST00000373203.9:reverse,c.-245T>A,247,out_of_frame_(1),ATA,UTR5,non_canonical_TIS,non_canonical_TIS(ATT)_to_non_canonic…	NA	NA	NA	NA	NA	NA	NA	NA	AGG; ATA	non_canonical_TIS; non_canonical_TIS	non_TIS(TGG)_to_non_canonical_TIS(AGG); non_canonical_TIS(ATT)_to_non_canonical_TIS(ATA)	TGA; TGA	127854355; 127854355	127815682; 127815682	127854600; 127854602	127843188; 127854521	TGCCATCCATAGGAGCCCAGCAC; ACTGCCATCCATAGGAGCCCAGC	0.467605631677048; 0.658978870640647	weak; moderate	c.-245; c.-247	c.125; c.-166	.	.	.	.	.
chr9	127854599	C	A	ENST00000373203.9:reverse	NM_001114753.3	ENG	.	c.-244G>T	UTR5	uTIS	out_of_frame_(2)	overlapping_6.28%	0.18693009118541	123/658	372	ENST00000373203.9:reverse,c.-244G>T,245,out_of_frame_(2),TTG,UTR5,non_canonical_TIS,non_TIS(TGG)_to_non_canonical_TIS(TTG),overlapping_6.28%,123[/658](aa),372,127854355,127854600,127843188,127815682,TGCCATCCATTTGAGCCCAGCAC,0.467605631677048,c.-245,c.125,weak,TGA,NM_001114753.3	NA	NA	NA	NA	NA	NA	NA	NA	TTG	non_canonical_TIS	non_TIS(TGG)_to_non_canonical_TIS(TTG)	TGA	127854355	127815682	127854600	127843188	TGCCATCCATTTGAGCCCAGCAC	0.467605631677048	weak	c.-245	c.125	.	.	.	.	.
chr9	127854598	C	T	ENST00000373203.9:reverse	NM_001114753.3	ENG	.	c.-243G>A	UTR5	uTIS	in_frame	elongated_CDS	1.12310030395137	739/658	2220	ENST00000373203.9:reverse,c.-243G>A,243,in_frame,AAG,UTR5,non_canonical_TIS,non_TIS(GAG)_to_non_canonical_TIS(AAG),elongated_CDS,739[/658](aa),2220,127854355,127854598,127815684,127815682,CCATCCATTGAAGCCCAGCACCC,0.478290618818009,c.-243,c.1975,weak,TAG,NM_001114753.3	NA	NA	NA	NA	NA	NA	NA	NA	AAG	non_canonical_TIS	non_TIS(GAG)_to_non_canonical_TIS(AAG)	TAG	127854355	127815682	127854598	127815684	CCATCCATTGAAGCCCAGCACCC	0.478290618818009	weak	c.-243	c.1975	.	.	.	.	.
chr9	127854597	T	A	ENST00000373203.9:reverse	NM_001114753.3	ENG	.	c.-242A>T	UTR5	uTIS	in_frame	elongated_CDS	1.12310030395137	739/658	2220	ENST00000373203.9:reverse,c.-242A>T,243,in_frame,GTG,UTR5,non_canonical_TIS,non_TIS(GAG)_to_non_canonical_TIS(GTG),elongated_CDS,739[/658](aa),2220,127854355,127854598,127815684,127815682,CCATCCATTGGTGCCCAGCACCC,0.478290618818009,c.-243,c.1975,weak,TAG,NM_001114753.3	NA	NA	NA	NA	NA	NA	NA	NA	GTG	non_canonical_TIS	non_TIS(GAG)_to_non_canonical_TIS(GTG)	TAG	127854355	127815682	127854598	127815684	CCATCCATTGGTGCCCAGCACCC	0.478290618818009	weak	c.-243	c.1975	.	.	.	.	.
chr9	127854596	C	A	ENST00000373203.9:reverse	NM_001114753.3	ENG	.	c.-241G>T	UTR5	uTIS	out_of_frame_(2)	overlapping_6.28%	0.185410334346505	122/658	369	ENST00000373203.9:reverse,c.-241G>T,242,out_of_frame_(2),ATC,UTR5,non_canonical_TIS,non_TIS(AGC)_to_non_canonical_TIS(ATC),overlapping_6.28%,122[/658](aa),369,127854355,127854597,127843188,127815682,CATCCATTGGATCCCAGCACCCC,0.473063376303412,c.-242,c.125,moderate,TGA,NM_001114753.3	NA	NA	NA	NA	NA	NA	NA	NA	ATC	non_canonical_TIS	non_TIS(AGC)_to_non_canonical_TIS(ATC)	TGA	127854355	127815682	127854597	127843188	CATCCATTGGATCCCAGCACCCC	0.473063376303412	weak	c.-242	c.125	.	.	.	.	.
chr9	127854595	G	C	ENST00000373203.9:reverse	NM_001114753.3	ENG	.	c.-240C>G	UTR5	uTIS	out_of_frame_(2)	overlapping_6.28%	0.185410334346505	122/658	369	ENST00000373203.9:reverse,c.-240C>G,242,out_of_frame_(2),AGG,UTR5,non_canonical_TIS,non_TIS(AGC)_to_non_canonical_TIS(AGG),overlapping_6.28%,122[/658](aa),369,127854355,127854597,127843188,127815682,CATCCATTGGAGGCCAGCACCCC,0.473063376303412,c.-242,c.125,moderate,TGA,NM_001114753.3	NA	NA	NA	NA	NA	NA	NA	NA	AGG	non_canonical_TIS	non_TIS(AGC)_to_non_canonical_TIS(AGG)	TGA	127854355	127815682	127854597	127843188	CATCCATTGGAGGCCAGCACCCC	0.473063376303412	weak	c.-242	c.125	.	.	.	.	.
chr9	127854593	G	T	ENST00000373203.9:reverse	NM_001114753.3	ENG	.	c.-238C>A	UTR5	uTIS	out_of_frame_(1)	not_overlapping	0.0364741641337386	24/658	75	ENST00000373203.9:reverse,c.-238C>A,238,out_of_frame_(1),AAG,UTR5,non_canonical_TIS,non_TIS(CAG)_to_non_canonical_TIS(AAG),not_overlapping,24[/658](aa),75,127854355,127854593,127854521,127815682,CATTGGAGCCAAGCACCCCCTCC,0.709859149735767,c.-238,c.-166,moderate,TGA,NM_001114753.3	NA	NA	NA	NA	NA	NA	NA	NA	AAG	non_canonical_TIS	non_TIS(CAG)_to_non_canonical_TIS(AAG)	TGA	127854355	127815682	127854593	127854521	CATTGGAGCCAAGCACCCCCTCC	0.709859149735767	moderate	c.-238	c.-166	.	.	.	.	.
chr9	127854592	T	A	ENST00000373203.9:reverse	NM_001114753.3	ENG	.	c.-237A>T	UTR5	uTIS	out_of_frame_(1)	not_overlapping	0.0364741641337386	24/658	75	ENST00000373203.9:reverse,c.-237A>T,238,out_of_frame_(1),CTG,UTR5,non_canonical_TIS,non_TIS(CAG)_to_non_canonical_TIS(CTG),not_overlapping,24[/658](aa),75,127854355,127854593,127854521,127815682,CATTGGAGCCCTGCACCCCCTCC,0.709859149735767,c.-238,c.-166,moderate,TGA,NM_001114753.3	NA	NA	NA	NA	NA	NA	NA	NA	CTG	non_canonical_TIS	non_TIS(CAG)_to_non_canonical_TIS(CTG)	TGA	127854355	127815682	127854593	127854521	CATTGGAGCCCTGCACCCCCTCC	0.709859149735767	moderate	c.-238	c.-166	.	.	.	.	.
chr9	127854591	C	A	ENST00000373203.9:reverse	NM_001114753.3	ENG	.	c.-236G>T	UTR5	uTIS	in_frame	elongated_CDS	1.12006079027356	737/658	2214	ENST00000373203.9:reverse,c.-236G>T,237,in_frame,ATC,UTR5,non_canonical_TIS,non_TIS(AGC)_to_non_canonical_TIS(ATC),elongated_CDS,737[/658](aa),2214,127854355,127854592,127815684,127815682,ATTGGAGCCCATCACCCCCTCCC,0.63380280566951,c.-237,c.1975,weak,TAG,NM_001114753.3	NA	NA	NA	NA	NA	NA	NA	NA	ATC	non_canonical_TIS	non_TIS(AGC)_to_non_canonical_TIS(ATC)	TAG	127854355	127815682	127854592	127815684	ATTGGAGCCCATCACCCCCTCCC	0.63380280566951	weak	c.-237	c.1975	.	.	.	.	.
chr9	127854590	G	C	ENST00000373203.9:reverse	NM_001114753.3	ENG	.	c.-235C>G	UTR5	uTIS	in_frame	elongated_CDS	1.12006079027356	737/658	2214	ENST00000373203.9:reverse,c.-235C>G,237,in_frame,AGG,UTR5,non_canonical_TIS,non_TIS(AGC)_to_non_canonical_TIS(AGG),elongated_CDS,737[/658](aa),2214,127854355,127854592,127815684,127815682,ATTGGAGCCCAGGACCCCCTCCC,0.63380280566951,c.-237,c.1975,weak,TAG,NM_001114753.3	NA	NA	NA	NA	NA	NA	NA	NA	AGG	non_canonical_TIS	non_TIS(AGC)_to_non_canonical_TIS(AGG)	TAG	127854355	127815682	127854592	127815684	ATTGGAGCCCAGGACCCCCTCCC	0.63380280566951	weak	c.-237	c.1975	.	.	.	.	.
chr9	127854588	G	A	ENST00000373203.9:reverse	NM_001114753.3	ENG	rs747984759	c.-233C>T	UTR5	uTIS	in_frame	elongated_CDS	1.11854103343465	736/658	2211	ENST00000373203.9:reverse,c.-233C>T,234,in_frame,ATC,UTR5,non_canonical_TIS,non_TIS(ACC)_to_non_canonical_TIS(ATC),elongated_CDS,736[/658](aa),2211,127854355,127854589,127815684,127815682,GGAGCCCAGCATCCCCTCCCCGC,0.783098591277921,c.-234,c.1975,moderate,TAG,NM_001114753.3	NA	NA	NA	NA	NA	NA	NA	NA	ATC	non_canonical_TIS	non_TIS(ACC)_to_non_canonical_TIS(ATC)	TAG	127854355	127815682	127854589	127815684	GGAGCCCAGCATCCCCTCCCCGC	0.783098591277921	moderate	c.-234	c.1975	.	.	.	.	.
chr9	127854587	G	C	ENST00000373203.9:reverse	NM_001114753.3	ENG	.	c.-232C>G	UTR5	uTIS	in_frame	elongated_CDS	1.11854103343465	736/658	2211	ENST00000373203.9:reverse,c.-232C>G,234,in_frame,ACG,UTR5,non_canonical_TIS,non_TIS(ACC)_to_non_canonical_TIS(ACG),elongated_CDS,736[/658](aa),2211,127854355,127854589,127815684,127815682,GGAGCCCAGCACGCCCTCCCCGC,0.783098591277921,c.-234,c.1975,moderate,TAG,NM_001114753.3	NA	NA	NA	NA	NA	NA	NA	NA	ACG	non_canonical_TIS	non_TIS(ACC)_to_non_canonical_TIS(ACG)	TAG	127854355	127815682	127854589	127815684	GGAGCCCAGCACGCCCTCCCCGC	0.783098591277921	moderate	c.-234	c.1975	.	.	.	.	.
chr9	127854584	G	T	ENST00000373203.9:reverse	NM_001114753.3	ENG	.	c.-229C>A	UTR5	uTIS	out_of_frame_(1)	not_overlapping	0.0319148936170213	21/658	66	ENST00000373203.9:reverse,c.-229C>A,229,out_of_frame_(1),ATC,UTR5,non_canonical_TIS,non_TIS(CTC)_to_non_canonical_TIS(ATC),not_overlapping,21[/658](aa),66,127854355,127854584,127854521,127815682,CCAGCACCCCATCCCCGCCCATC,0.613908446311347,c.-229,c.-166,moderate,TGA,NM_001114753.3	NA	NA	NA	NA	NA	NA	NA	NA	ATC	non_canonical_TIS	non_TIS(CTC)_to_non_canonical_TIS(ATC)	TGA	127854355	127815682	127854584	127854521	CCAGCACCCCATCCCCGCCCATC	0.613908446311347	weak	c.-229	c.-166	.	.	.	.	.
chr9	127854582	G	C	ENST00000373203.9:reverse	NM_001114753.3	ENG	rs955866378	c.-227C>G	UTR5	uTIS	out_of_frame_(1)	not_overlapping	0.0319148936170213	21/658	66	ENST00000373203.9:reverse,c.-227C>G,229,out_of_frame_(1),CTG,UTR5,non_canonical_TIS,non_TIS(CTC)_to_non_canonical_TIS(CTG),not_overlapping,21[/658](aa),66,127854355,127854584,127854521,127815682,CCAGCACCCCCTGCCCGCCCATC,0.613908446311347,c.-229,c.-166,moderate,TGA,NM_001114753.3	NA	NA	NA	NA	NA	NA	NA	NA	CTG	non_canonical_TIS	non_TIS(CTC)_to_non_canonical_TIS(CTG)	TGA	127854355	127815682	127854584	127854521	CCAGCACCCCCTGCCCGCCCATC	0.613908446311347	weak	c.-229	c.-166	0.0001	0.0002	Telangiectasia,_hereditary_hemorrhagic,_type_1	MONDO:MONDO:0008535,MedGen:C4551861,OMIM:187300	Uncertain_significance
chr9	127854580	G	T	ENST00000373203.9:reverse	NM_001114753.3	ENG	.	c.-225C>A	UTR5	uTIS	in_frame	elongated_CDS	1.11398176291793	733/658	2202	ENST00000373203.9:reverse,c.-225C>A,225,in_frame,ACG,UTR5,non_canonical_TIS,non_TIS(CCG)_to_non_canonical_TIS(ACG),elongated_CDS,733[/658](aa),2202,127854355,127854580,127815684,127815682,CACCCCCTCCACGCCCATCCTTC,0.599593434255125,c.-225,c.1975,weak,TAG,NM_001114753.3	NA	NA	NA	NA	NA	NA	NA	NA	ACG	non_canonical_TIS	non_TIS(CCG)_to_non_canonical_TIS(ACG)	TAG	127854355	127815682	127854580	127815684	CACCCCCTCCACGCCCATCCTTC	0.599593434255125	weak	c.-225	c.1975	.	.	.	.	.
chr9	127854579	G	A	ENST00000373203.9:reverse	NM_001114753.3	ENG	.	c.-224C>T	UTR5	uTIS	in_frame	elongated_CDS	1.11398176291793	733/658	2202	ENST00000373203.9:reverse,c.-224C>T,225,in_frame,CTG,UTR5,non_canonical_TIS,non_TIS(CCG)_to_non_canonical_TIS(CTG),elongated_CDS,733[/658](aa),2202,127854355,127854580,127815684,127815682,CACCCCCTCCCTGCCCATCCTTC,0.599593434255125,c.-225,c.1975,weak,TAG,NM_001114753.3	NA	NA	NA	NA	NA	NA	NA	NA	CTG	non_canonical_TIS	non_TIS(CCG)_to_non_canonical_TIS(CTG)	TAG	127854355	127815682	127854580	127815684	CACCCCCTCCCTGCCCATCCTTC	0.599593434255125	weak	c.-225	c.1975	6.57e-06	1.47e-05	.	.	.
chr9	127854572	G	A	ENST00000373203.9:reverse	NM_001114753.3	ENG	.	c.-217C>T	UTR5	uTIS	in_frame	elongated_CDS	1.11094224924012	731/658	2196	ENST00000373203.9:reverse,c.-217C>T,219,in_frame,ATT,UTR5,non_canonical_TIS,non_canonical_TIS(ATC)_to_non_canonical_TIS(ATT),elongated_CDS,731[/658](aa),2196,127854355,127854574,127815684,127815682,CTCCCCGCCCATTCTTCGGACAG,0.560563377507638,c.-219,c.1975,weak,TAG,NM_001114753.3	NA	NA	NA	NA	NA	NA	NA	NA	ATT	non_canonical_TIS	non_canonical_TIS(ATC)_to_non_canonical_TIS(ATT)	TAG	127854355	127815682	127854574	127815684	CTCCCCGCCCATTCTTCGGACAG	0.560563377507638	weak	c.-219	c.1975	.	.	.	.	.
chr9	127854572	G	C	ENST00000373203.9:reverse	NM_001114753.3	ENG	.	c.-217C>G	UTR5	uTIS	in_frame	elongated_CDS	1.11094224924012	731/658	2196	ENST00000373203.9:reverse,c.-217C>G,219,in_frame,ATG,UTR5,canonical_TIS,non_canonical_TIS(ATC)_to_canonical_TIS(ATG),elongated_CDS,731[/658](aa),2196,127854355,127854574,127815684,127815682,CTCCCCGCCCATGCTTCGGACAG,0.560563377507638,c.-219,c.1975,weak,TAG,NM_001114753.3	NA	NA	NA	NA	NA	NA	NA	NA	ATG	canonical_TIS	non_canonical_TIS(ATC)_to_canonical_TIS(ATG)	TAG	127854355	127815682	127854574	127815684	CTCCCCGCCCATGCTTCGGACAG	0.560563377507638	weak	c.-219	c.1975	.	.	.	.	.
chr9	127854572	G	T	ENST00000373203.9:reverse	NM_001114753.3	ENG	.	c.-217C>A	UTR5	uTIS	in_frame	elongated_CDS	1.11094224924012	731/658	2196	ENST00000373203.9:reverse,c.-217C>A,219,in_frame,ATA,UTR5,non_canonical_TIS,non_canonical_TIS(ATC)_to_non_canonical_TIS(ATA),elongated_CDS,731[/658](aa),2196,127854355,127854574,127815684,127815682,CTCCCCGCCCATACTTCGGACAG,0.560563377507638,c.-219,c.1975,weak,TAG,NM_001114753.3	NA	NA	NA	NA	NA	NA	NA	NA	ATA	non_canonical_TIS	non_canonical_TIS(ATC)_to_non_canonical_TIS(ATA)	TAG	127854355	127815682	127854574	127815684	CTCCCCGCCCATACTTCGGACAG	0.560563377507638	weak	c.-219	c.1975	.	.	.	.	.
chr9	127854571	G	T	ENST00000373203.9:reverse	NM_001114753.3	ENG	.	c.-216C>A	UTR5	uTIS	in_frame	elongated_CDS	1.10942249240122	730/658	2193	ENST00000373203.9:reverse,c.-216C>A,216,in_frame,ATT,UTR5,non_canonical_TIS,non_TIS(CTT)_to_non_canonical_TIS(ATT),elongated_CDS,730[/658](aa),2193,127854355,127854571,127815684,127815682,CCCGCCCATCATTCGGACAGCAA,0.737269491599501,c.-216,c.1975,moderate,TAG,NM_001114753.3	NA	NA	NA	NA	NA	NA	NA	NA	ATT	non_canonical_TIS	non_TIS(CTT)_to_non_canonical_TIS(ATT)	TAG	127854355	127815682	127854571	127815684	CCCGCCCATCATTCGGACAGCAA	0.737269491599501	moderate	c.-216	c.1975	.	.	.	.	.
chr9	127854570	A	T	ENST00000373203.9:reverse	NM_001114753.3	ENG	.	c.-215T>A	UTR5	uTIS	out_of_frame_(2)	overlapping_6.28%	0.171732522796353	113/658	342	ENST00000373203.9:reverse,c.-215T>A,215,out_of_frame_(2),ATC,UTR5,non_canonical_TIS,non_TIS(TTC)_to_non_canonical_TIS(ATC),overlapping_6.28%,113[/658](aa),342,127854355,127854570,127843188,127815682,CCGCCCATCCATCGGACAGCAAC,0.633626758627951,c.-215,c.125,weak,TGA,NM_001114753.3	NA	NA	NA	NA	NA	NA	NA	NA	ATC	non_canonical_TIS	non_TIS(TTC)_to_non_canonical_TIS(ATC)	TGA	127854355	127815682	127854570	127843188	CCGCCCATCCATCGGACAGCAAC	0.633626758627951	moderate	c.-215	c.125	.	.	.	.	.
chr9	127854569	A	C	ENST00000373203.9:reverse	NM_001114753.3	ENG	.	c.-214T>G	UTR5	uTIS	in_frame	elongated_CDS	1.10942249240122	730/658	2193	ENST00000373203.9:reverse,c.-214T>G,216,in_frame,CTG,UTR5,non_canonical_TIS,non_TIS(CTT)_to_non_canonical_TIS(CTG),elongated_CDS,730[/658](aa),2193,127854355,127854571,127815684,127815682,CCCGCCCATCCTGCGGACAGCAA,0.737269491599501,c.-216,c.1975,moderate,TAG,NM_001114753.3	NA	NA	NA	NA	NA	NA	NA	NA	CTG	non_canonical_TIS	non_TIS(CTT)_to_non_canonical_TIS(CTG)	TAG	127854355	127815682	127854571	127815684	CCCGCCCATCCTGCGGACAGCAA	0.737269491599501	moderate	c.-216	c.1975	.	.	.	.	.
chr9	127854569	A	T	ENST00000373203.9:reverse	NM_001114753.3	ENG	.	c.-214T>A	UTR5	uTIS	out_of_frame_(1)	not_overlapping	0.0243161094224924	16/658	51	ENST00000373203.9:reverse,c.-214T>A,214,out_of_frame_(1),ACG,UTR5,non_canonical_TIS,non_TIS(TCG)_to_non_canonical_TIS(ACG),not_overlapping,16[/658](aa),51,127854355,127854569,127854521,127815682,CGCCCATCCTACGGACAGCAACT,0.554346954856097,c.-214,c.-166,weak,TGA,NM_001114753.3	NA	NA	NA	NA	NA	NA	NA	NA	ACG	non_canonical_TIS	non_TIS(TCG)_to_non_canonical_TIS(ACG)	TGA	127854355	127815682	127854569	127854521	CGCCCATCCTACGGACAGCAACT	0.554346954856097	moderate	c.-214	c.-166	.	.	.	.	.
chr9	127854568	G	A	ENST00000373203.9:reverse	NM_001114753.3	ENG	rs965106604	c.-213C>T	UTR5	uTIS	out_of_frame_(1)	not_overlapping	0.0243161094224924	16/658	51	ENST00000373203.9:reverse,c.-213C>T,214,out_of_frame_(1),TTG,UTR5,non_canonical_TIS,non_TIS(TCG)_to_non_canonical_TIS(TTG),not_overlapping,16[/658](aa),51,127854355,127854569,127854521,127815682,CGCCCATCCTTTGGACAGCAACT,0.554346954856097,c.-214,c.-166,weak,TGA,NM_001114753.3	NA	NA	NA	NA	NA	NA	NA	NA	TTG	non_canonical_TIS	non_TIS(TCG)_to_non_canonical_TIS(TTG)	TGA	127854355	127815682	127854569	127854521	CGCCCATCCTTTGGACAGCAACT	0.554346954856097	moderate	c.-214	c.-166	2.629e-05	4.827e-05	.	.	.
chr9	127854568	G	C	ENST00000373203.9:reverse	NM_001114753.3	ENG	.	c.-213C>G	UTR5	uTIS	out_of_frame_(2)	overlapping_6.28%	0.171732522796353	113/658	342	ENST00000373203.9:reverse,c.-213C>G,215,out_of_frame_(2),TTG,UTR5,non_canonical_TIS,non_TIS(TTC)_to_non_canonical_TIS(TTG),overlapping_6.28%,113[/658](aa),342,127854355,127854570,127843188,127815682,CCGCCCATCCTTGGGACAGCAAC,0.633626758627951,c.-215,c.125,weak,TGA,NM_001114753.3	NA	NA	NA	NA	NA	NA	NA	NA	TTG	non_canonical_TIS	non_TIS(TTC)_to_non_canonical_TIS(TTG)	TGA	127854355	127815682	127854570	127843188	CCGCCCATCCTTGGGACAGCAAC	0.633626758627951	moderate	c.-215	c.125	.	.	.	.	.
chr9	127854568	G	T	ENST00000373203.9:reverse	NM_001114753.3	ENG	.	c.-213C>A	UTR5	uTIS	in_frame	elongated_CDS	1.10790273556231	729/658	2190	ENST00000373203.9:reverse,c.-213C>A,213,in_frame,AGG,UTR5,non_canonical_TIS,non_TIS(CGG)_to_non_canonical_TIS(AGG),elongated_CDS,729[/658](aa),2190,127854355,127854568,127815684,127815682,GCCCATCCTTAGGACAGCAACTC,0.475880278827515,c.-213,c.1975,moderate,TAG,NM_001114753.3	NA	NA	NA	NA	NA	NA	NA	NA	AGG	non_canonical_TIS	non_TIS(CGG)_to_non_canonical_TIS(AGG)	TAG	127854355	127815682	127854568	127815684	GCCCATCCTTAGGACAGCAACTC	0.475880278827515	weak	c.-213	c.1975	.	.	.	.	.
chr9	127854567	C	A	ENST00000373203.9:reverse	NM_001114753.3	ENG	.	c.-212G>T	UTR5	uTIS	in_frame	elongated_CDS	1.10790273556231	729/658	2190	ENST00000373203.9:reverse,c.-212G>T,213,in_frame,CTG,UTR5,non_canonical_TIS,non_TIS(CGG)_to_non_canonical_TIS(CTG),elongated_CDS,729[/658](aa),2190,127854355,127854568,127815684,127815682,GCCCATCCTTCTGACAGCAACTC,0.475880278827515,c.-213,c.1975,moderate,TAG,NM_001114753.3	NA	NA	NA	NA	NA	NA	NA	NA	CTG	non_canonical_TIS	non_TIS(CGG)_to_non_canonical_TIS(CTG)	TAG	127854355	127815682	127854568	127815684	GCCCATCCTTCTGACAGCAACTC	0.475880278827515	weak	c.-213	c.1975	.	.	.	.	.
chr9	127854564	G	A	ENST00000373203.9:reverse	NM_001114753.3	ENG	.	c.-209C>T	UTR5	uTIS	in_frame	elongated_CDS	1.1063829787234	728/658	2187	ENST00000373203.9:reverse,c.-209C>T,210,in_frame,ATA,UTR5,non_canonical_TIS,non_TIS(ACA)_to_non_canonical_TIS(ATA),elongated_CDS,728[/658](aa),2187,127854355,127854565,127815684,127815682,CATCCTTCGGATAGCAACTCCAG,0.588149769088987,c.-210,c.1975,weak,TAG,NM_001114753.3	NA	NA	NA	NA	NA	NA	NA	NA	ATA	non_canonical_TIS	non_TIS(ACA)_to_non_canonical_TIS(ATA)	TAG	127854355	127815682	127854565	127815684	CATCCTTCGGATAGCAACTCCAG	0.588149769088987	moderate	c.-210	c.1975	6.571e-06	.	.	.	.
chr9	127854564	G	T	ENST00000373203.9:reverse	NM_001114753.3	ENG	.	c.-209C>A	UTR5	uTIS	out_of_frame_(2)	overlapping_6.28%	0.168693009118541	111/658	336	ENST00000373203.9:reverse,c.-209C>A,209,out_of_frame_(2),AAG,UTR5,non_canonical_TIS,non_TIS(CAG)_to_non_canonical_TIS(AAG),overlapping_6.28%,111[/658](aa),336,127854355,127854564,127843188,127815682,ATCCTTCGGAAAGCAACTCCAGC,0.594366197092641,c.-209,c.125,moderate,TGA,NM_001114753.3	NA	NA	NA	NA	NA	NA	NA	NA	AAG	non_canonical_TIS	non_TIS(CAG)_to_non_canonical_TIS(AAG)	TGA	127854355	127815682	127854564	127843188	ATCCTTCGGAAAGCAACTCCAGC	0.594366197092641	moderate	c.-209	c.125	.	.	.	.	.
chr9	127854563	T	A	ENST00000373203.9:reverse	NM_001114753.3	ENG	.	c.-208A>T	UTR5	uTIS	out_of_frame_(2)	overlapping_6.28%	0.168693009118541	111/658	336	ENST00000373203.9:reverse,c.-208A>T,209,out_of_frame_(2),CTG,UTR5,non_canonical_TIS,non_TIS(CAG)_to_non_canonical_TIS(CTG),overlapping_6.28%,111[/658](aa),336,127854355,127854564,127843188,127815682,ATCCTTCGGACTGCAACTCCAGC,0.594366197092641,c.-209,c.125,moderate,TGA,NM_001114753.3	NA	NA	NA	NA	NA	NA	NA	NA	CTG	non_canonical_TIS	non_TIS(CAG)_to_non_canonical_TIS(CTG)	TGA	127854355	127815682	127854564	127843188	ATCCTTCGGACTGCAACTCCAGC	0.594366197092641	moderate	c.-209	c.125	.	.	.	.	.
chr9	127854563	T	C	ENST00000373203.9:reverse	NM_001114753.3	ENG	.	c.-208A>G	UTR5	uTIS	in_frame	elongated_CDS	1.1063829787234	728/658	2187	ENST00000373203.9:reverse,c.-208A>G,210,in_frame,ACG,UTR5,non_canonical_TIS,non_TIS(ACA)_to_non_canonical_TIS(ACG),elongated_CDS,728[/658](aa),2187,127854355,127854565,127815684,127815682,CATCCTTCGGACGGCAACTCCAG,0.588149769088987,c.-210,c.1975,weak,TAG,NM_001114753.3	NA	NA	NA	NA	NA	NA	NA	NA	ACG	non_canonical_TIS	non_TIS(ACA)_to_non_canonical_TIS(ACG)	TAG	127854355	127815682	127854565	127815684	CATCCTTCGGACGGCAACTCCAG	0.588149769088987	moderate	c.-210	c.1975	.	.	.	.	.
chr9	127854562	C	A	ENST00000373203.9:reverse	NM_001114753.3	ENG	.	c.-207G>T	UTR5	uTIS	out_of_frame_(1)	not_overlapping	0.0212765957446809	14/658	45	ENST00000373203.9:reverse,c.-207G>T,208,out_of_frame_(1),ATC,UTR5,non_canonical_TIS,non_TIS(AGC)_to_non_canonical_TIS(ATC),not_overlapping,14[/658](aa),45,127854355,127854563,127854521,127815682,TCCTTCGGACATCAACTCCAGCC,0.701232392445844,c.-208,c.-166,moderate,TGA,NM_001114753.3	NA	NA	NA	NA	NA	NA	NA	NA	ATC	non_canonical_TIS	non_TIS(AGC)_to_non_canonical_TIS(ATC)	TGA	127854355	127815682	127854563	127854521	TCCTTCGGACATCAACTCCAGCC	0.701232392445844	moderate	c.-208	c.-166	.	.	.	.	.
chr9	127854561	G	C	ENST00000373203.9:reverse	NM_001114753.3	ENG	.	c.-206C>G	UTR5	uTIS	out_of_frame_(1)	not_overlapping	0.0212765957446809	14/658	45	ENST00000373203.9:reverse,c.-206C>G,208,out_of_frame_(1),AGG,UTR5,non_canonical_TIS,non_TIS(AGC)_to_non_canonical_TIS(AGG),not_overlapping,14[/658](aa),45,127854355,127854563,127854521,127815682,TCCTTCGGACAGGAACTCCAGCC,0.701232392445844,c.-208,c.-166,moderate,TGA,NM_001114753.3	NA	NA	NA	NA	NA	NA	NA	NA	AGG	non_canonical_TIS	non_TIS(AGC)_to_non_canonical_TIS(AGG)	TGA	127854355	127815682	127854563	127854521	TCCTTCGGACAGGAACTCCAGCC	0.701232392445844	moderate	c.-208	c.-166	.	.	.	.	.
chr9	127854559	T	A	ENST00000373203.9:reverse	NM_001114753.3	ENG	.	c.-204A>T	UTR5	uTIS	out_of_frame_(1)	not_overlapping	0.0197568389057751	13/658	42	ENST00000373203.9:reverse,c.-204A>T,205,out_of_frame_(1),ATC,UTR5,non_canonical_TIS,non_TIS(AAC)_to_non_canonical_TIS(ATC),not_overlapping,13[/658](aa),42,127854355,127854560,127854521,127815682,TTCGGACAGCATCTCCAGCCCAG,0.782222536070109,c.-205,c.-166,moderate,TGA,NM_001114753.3	NA	NA	NA	NA	NA	NA	NA	NA	ATC	non_canonical_TIS	non_TIS(AAC)_to_non_canonical_TIS(ATC)	TGA	127854355	127815682	127854560	127854521	TTCGGACAGCATCTCCAGCCCAG	0.782222536070109	moderate	c.-205	c.-166	.	.	.	.	.
chr9	127854558	G	A	ENST00000373203.9:reverse	NM_001114753.3	ENG	rs1027345417	c.-203C>T	UTR5	uTIS	in_frame	elongated_CDS	1.10334346504559	726/658	2181	ENST00000373203.9:reverse,c.-203C>T,204,in_frame,ATT,UTR5,non_canonical_TIS,non_TIS(ACT)_to_non_canonical_TIS(ATT),elongated_CDS,726[/658](aa),2181,127854355,127854559,127815684,127815682,TCGGACAGCAATTCCAGCCCAGC,0.63644366382811,c.-204,c.1975,strong,TAG,NM_001114753.3	NA	NA	NA	NA	NA	NA	NA	NA	ATT	non_canonical_TIS	non_TIS(ACT)_to_non_canonical_TIS(ATT)	TAG	127854355	127815682	127854559	127815684	TCGGACAGCAATTCCAGCCCAGC	0.63644366382811	moderate	c.-204	c.1975	6.572e-06	6.542e-05	.	.	.
chr9	127854558	G	C	ENST00000373203.9:reverse	NM_001114753.3	ENG	.	c.-203C>G	UTR5	uTIS	out_of_frame_(1)	not_overlapping	0.0197568389057751	13/658	42	ENST00000373203.9:reverse,c.-203C>G,205,out_of_frame_(1),AAG,UTR5,non_canonical_TIS,non_TIS(AAC)_to_non_canonical_TIS(AAG),not_overlapping,13[/658](aa),42,127854355,127854560,127854521,127815682,TTCGGACAGCAAGTCCAGCCCAG,0.782222536070109,c.-205,c.-166,moderate,TGA,NM_001114753.3	NA	NA	NA	NA	NA	NA	NA	NA	AAG	non_canonical_TIS	non_TIS(AAC)_to_non_canonical_TIS(AAG)	TGA	127854355	127815682	127854560	127854521	TTCGGACAGCAAGTCCAGCCCAG	0.782222536070109	moderate	c.-205	c.-166	.	.	.	.	.
chr9	127854558	G	T	ENST00000373203.9:reverse	NM_001114753.3	ENG	.	c.-203C>A	UTR5	uTIS	out_of_frame_(2)	overlapping_6.28%	0.165653495440729	109/658	330	ENST00000373203.9:reverse,c.-203C>A,203,out_of_frame_(2),ATC,UTR5,non_canonical_TIS,non_TIS(CTC)_to_non_canonical_TIS(ATC),overlapping_6.28%,109[/658](aa),330,127854355,127854558,127843188,127815682,CGGACAGCAAATCCAGCCCAGCC,0.501408451262051,c.-203,c.125,weak,TGA,NM_001114753.3	NA	NA	NA	NA	NA	NA	NA	NA	ATC	non_canonical_TIS	non_TIS(CTC)_to_non_canonical_TIS(ATC)	TGA	127854355	127815682	127854558	127843188	CGGACAGCAAATCCAGCCCAGCC	0.501408451262051	weak	c.-203	c.125	.	.	.	.	.
chr9	127854557	A	C	ENST00000373203.9:reverse	NM_001114753.3	ENG	.	c.-202T>G	UTR5	uTIS	in_frame	elongated_CDS	1.10334346504559	726/658	2181	ENST00000373203.9:reverse,c.-202T>G,204,in_frame,ACG,UTR5,non_canonical_TIS,non_TIS(ACT)_to_non_canonical_TIS(ACG),elongated_CDS,726[/658](aa),2181,127854355,127854559,127815684,127815682,TCGGACAGCAACGCCAGCCCAGC,0.63644366382811,c.-204,c.1975,strong,TAG,NM_001114753.3	NA	NA	NA	NA	NA	NA	NA	NA	ACG	non_canonical_TIS	non_TIS(ACT)_to_non_canonical_TIS(ACG)	TAG	127854355	127815682	127854559	127815684	TCGGACAGCAACGCCAGCCCAGC	0.63644366382811	moderate	c.-204	c.1975	.	.	.	.	.
chr9	127854556	G	C	ENST00000373203.9:reverse	NM_001114753.3	ENG	.	c.-201C>G	UTR5	uTIS	out_of_frame_(2)	overlapping_6.28%	0.165653495440729	109/658	330	ENST00000373203.9:reverse,c.-201C>G,203,out_of_frame_(2),CTG,UTR5,non_canonical_TIS,non_TIS(CTC)_to_non_canonical_TIS(CTG),overlapping_6.28%,109[/658](aa),330,127854355,127854558,127843188,127815682,CGGACAGCAACTGCAGCCCAGCC,0.501408451262051,c.-203,c.125,weak,TGA,NM_001114753.3	NA	NA	NA	NA	NA	NA	NA	NA	CTG	non_canonical_TIS	non_TIS(CTC)_to_non_canonical_TIS(CTG)	TGA	127854355	127815682	127854558	127843188	CGGACAGCAACTGCAGCCCAGCC	0.501408451262051	weak	c.-203	c.125	.	.	.	.	.
chr9	127854555	G	T	ENST00000373203.9:reverse	NM_001114753.3	ENG	.	c.-200C>A	UTR5	uTIS	out_of_frame_(2)	overlapping_6.28%	0.164133738601824	108/658	327	ENST00000373203.9:reverse,c.-200C>A,200,out_of_frame_(2),AAG,UTR5,non_canonical_TIS,non_TIS(CAG)_to_non_canonical_TIS(AAG),overlapping_6.28%,108[/658](aa),327,127854355,127854555,127843188,127815682,ACAGCAACTCAAGCCCAGCCCCG,0.548713147131836,c.-200,c.125,weak,TGA,NM_001114753.3	NA	NA	NA	NA	NA	NA	NA	NA	AAG	non_canonical_TIS	non_TIS(CAG)_to_non_canonical_TIS(AAG)	TGA	127854355	127815682	127854555	127843188	ACAGCAACTCAAGCCCAGCCCCG	0.548713147131836	weak	c.-200	c.125	.	.	.	.	.
chr9	127854554	T	A	ENST00000373203.9:reverse	NM_001114753.3	ENG	.	c.-199A>T	UTR5	uTIS	out_of_frame_(2)	overlapping_6.28%	0.164133738601824	108/658	327	ENST00000373203.9:reverse,c.-199A>T,200,out_of_frame_(2),CTG,UTR5,non_canonical_TIS,non_TIS(CAG)_to_non_canonical_TIS(CTG),overlapping_6.28%,108[/658](aa),327,127854355,127854555,127843188,127815682,ACAGCAACTCCTGCCCAGCCCCG,0.548713147131836,c.-200,c.125,weak,TGA,NM_001114753.3	NA	NA	NA	NA	NA	NA	NA	NA	CTG	non_canonical_TIS	non_TIS(CAG)_to_non_canonical_TIS(CTG)	TGA	127854355	127815682	127854555	127843188	ACAGCAACTCCTGCCCAGCCCCG	0.548713147131836	weak	c.-200	c.125	.	.	.	.	.
chr9	127854553	C	A	ENST00000373203.9:reverse	NM_001114753.3	ENG	.	c.-198G>T	UTR5	uTIS	out_of_frame_(1)	not_overlapping	0.0167173252279635	11/658	36	ENST00000373203.9:reverse,c.-198G>T,199,out_of_frame_(1),ATC,UTR5,non_canonical_TIS,non_TIS(AGC)_to_non_canonical_TIS(ATC),not_overlapping,11[/658](aa),36,127854355,127854554,127854521,127815682,CAGCAACTCCATCCCAGCCCCGC,0.599999999464789,c.-199,c.-166,moderate,TGA,NM_001114753.3	NA	NA	NA	NA	NA	NA	NA	NA	ATC	non_canonical_TIS	non_TIS(AGC)_to_non_canonical_TIS(ATC)	TGA	127854355	127815682	127854554	127854521	CAGCAACTCCATCCCAGCCCCGC	0.599999999464789	weak	c.-199	c.-166	.	.	.	.	.
chr9	127854552	G	C	ENST00000373203.9:reverse	NM_001114753.3	ENG	.	c.-197C>G	UTR5	uTIS	out_of_frame_(1)	not_overlapping	0.0167173252279635	11/658	36	ENST00000373203.9:reverse,c.-197C>G,199,out_of_frame_(1),AGG,UTR5,non_canonical_TIS,non_TIS(AGC)_to_non_canonical_TIS(AGG),not_overlapping,11[/658](aa),36,127854355,127854554,127854521,127815682,CAGCAACTCCAGGCCAGCCCCGC,0.599999999464789,c.-199,c.-166,moderate,TGA,NM_001114753.3	NA	NA	NA	NA	NA	NA	NA	NA	AGG	non_canonical_TIS	non_TIS(AGC)_to_non_canonical_TIS(AGG)	TGA	127854355	127815682	127854554	127854521	CAGCAACTCCAGGCCAGCCCCGC	0.599999999464789	weak	c.-199	c.-166	.	.	.	.	.
chr9	127854550	G	T	ENST00000373203.9:reverse	NM_001114753.3	ENG	.	c.-195C>A	UTR5	uTIS	in_frame	elongated_CDS	1.09878419452888	723/658	2172	ENST00000373203.9:reverse,c.-195C>A,195,in_frame,AAG,UTR5,non_canonical_TIS,non_TIS(CAG)_to_non_canonical_TIS(AAG),elongated_CDS,723[/658](aa),2172,127854355,127854550,127815684,127815682,AACTCCAGCCAAGCCCCGCGTCC,0.712676052259869,c.-195,c.1975,moderate,TAG,NM_001114753.3	NA	NA	NA	NA	NA	NA	NA	NA	AAG	non_canonical_TIS	non_TIS(CAG)_to_non_canonical_TIS(AAG)	TAG	127854355	127815682	127854550	127815684	AACTCCAGCCAAGCCCCGCGTCC	0.712676052259869	moderate	c.-195	c.1975	.	.	.	.	.
chr9	127854549	T	A	ENST00000373203.9:reverse	NM_001114753.3	ENG	.	c.-194A>T	UTR5	uTIS	in_frame	elongated_CDS	1.09878419452888	723/658	2172	ENST00000373203.9:reverse,c.-194A>T,195,in_frame,CTG,UTR5,non_canonical_TIS,non_TIS(CAG)_to_non_canonical_TIS(CTG),elongated_CDS,723[/658](aa),2172,127854355,127854550,127815684,127815682,AACTCCAGCCCTGCCCCGCGTCC,0.712676052259869,c.-195,c.1975,moderate,TAG,NM_001114753.3	NA	NA	NA	NA	NA	NA	NA	NA	CTG	non_canonical_TIS	non_TIS(CAG)_to_non_canonical_TIS(CTG)	TAG	127854355	127815682	127854550	127815684	AACTCCAGCCCTGCCCCGCGTCC	0.712676052259869	moderate	c.-195	c.1975	.	.	.	.	.
chr9	127854548	C	A	ENST00000373203.9:reverse	NM_001114753.3	ENG	.	c.-193G>T	UTR5	uTIS	out_of_frame_(2)	overlapping_6.28%	0.161094224924012	106/658	321	ENST00000373203.9:reverse,c.-193G>T,194,out_of_frame_(2),ATC,UTR5,non_canonical_TIS,non_TIS(AGC)_to_non_canonical_TIS(ATC),overlapping_6.28%,106[/658](aa),321,127854355,127854549,127843188,127815682,ACTCCAGCCCATCCCCGCGTCCC,0.60264084156705,c.-194,c.125,moderate,TGA,NM_001114753.3	NA	NA	NA	NA	NA	NA	NA	NA	ATC	non_canonical_TIS	non_TIS(AGC)_to_non_canonical_TIS(ATC)	TGA	127854355	127815682	127854549	127843188	ACTCCAGCCCATCCCCGCGTCCC	0.60264084156705	weak	c.-194	c.125	.	.	.	.	.
chr9	127854547	G	C	ENST00000373203.9:reverse	NM_001114753.3	ENG	.	c.-192C>G	UTR5	uTIS	out_of_frame_(2)	overlapping_6.28%	0.161094224924012	106/658	321	ENST00000373203.9:reverse,c.-192C>G,194,out_of_frame_(2),AGG,UTR5,non_canonical_TIS,non_TIS(AGC)_to_non_canonical_TIS(AGG),overlapping_6.28%,106[/658](aa),321,127854355,127854549,127843188,127815682,ACTCCAGCCCAGGCCCGCGTCCC,0.60264084156705,c.-194,c.125,moderate,TGA,NM_001114753.3	NA	NA	NA	NA	NA	NA	NA	NA	AGG	non_canonical_TIS	non_TIS(AGC)_to_non_canonical_TIS(AGG)	TGA	127854355	127815682	127854549	127843188	ACTCCAGCCCAGGCCCGCGTCCC	0.60264084156705	weak	c.-194	c.125	.	.	.	.	.
chr9	127854545	G	T	ENST00000373203.9:reverse	NM_001114753.3	ENG	.	c.-190C>A	UTR5	uTIS	out_of_frame_(1)	not_overlapping	0.0121580547112462	8/658	27	ENST00000373203.9:reverse,c.-190C>A,190,out_of_frame_(1),ACG,UTR5,non_canonical_TIS,non_TIS(CCG)_to_non_canonical_TIS(ACG),not_overlapping,8[/658](aa),27,127854355,127854545,127854521,127815682,CAGCCCAGCCACGCGTCCCTGTG,0.690140842771276,c.-190,c.-166,moderate,TGA,NM_001114753.3	NA	NA	NA	NA	NA	NA	NA	NA	ACG	non_canonical_TIS	non_TIS(CCG)_to_non_canonical_TIS(ACG)	TGA	127854355	127815682	127854545	127854521	CAGCCCAGCCACGCGTCCCTGTG	0.690140842771276	moderate	c.-190	c.-166	.	.	.	.	.
chr9	127854544	G	A	ENST00000373203.9:reverse	NM_001114753.3	ENG	rs1044390093	c.-189C>T	UTR5	uTIS	out_of_frame_(1)	not_overlapping	0.0121580547112462	8/658	27	ENST00000373203.9:reverse,c.-189C>T,190,out_of_frame_(1),CTG,UTR5,non_canonical_TIS,non_TIS(CCG)_to_non_canonical_TIS(CTG),not_overlapping,8[/658](aa),27,127854355,127854545,127854521,127815682,CAGCCCAGCCCTGCGTCCCTGTG,0.690140842771276,c.-190,c.-166,moderate,TGA,NM_001114753.3	NA	NA	NA	NA	NA	NA	NA	NA	CTG	non_canonical_TIS	non_TIS(CCG)_to_non_canonical_TIS(CTG)	TGA	127854355	127815682	127854545	127854521	CAGCCCAGCCCTGCGTCCCTGTG	0.690140842771276	moderate	c.-190	c.-166	1.314e-05	2.94e-05	.	.	.
chr9	127854543	C	T	ENST00000373203.9:reverse	NM_001114753.3	ENG	rs961480381	c.-188G>A	UTR5	uTIS	out_of_frame_(2)	overlapping_6.28%	0.158054711246201	104/658	315	ENST00000373203.9:reverse,c.-188G>A,188,out_of_frame_(2),ACG,UTR5,non_canonical_TIS,non_TIS(GCG)_to_non_canonical_TIS(ACG),overlapping_6.28%,104[/658](aa),315,127854355,127854543,127843188,127815682,GCCCAGCCCCACGTCCCTGTGTC,0.602171359597071,c.-188,c.125,weak,TGA,NM_001114753.3	NA	NA	NA	NA	NA	NA	NA	NA	ACG	non_canonical_TIS	non_TIS(GCG)_to_non_canonical_TIS(ACG)	TGA	127854355	127815682	127854543	127843188	GCCCAGCCCCACGTCCCTGTGTC	0.602171359597071	weak	c.-188	c.125	0.0002	0.0003	Telangiectasia,_hereditary_hemorrhagic,_type_1|not_provided	MONDO:MONDO:0008535,MedGen:C4551861,OMIM:187300|MedGen:CN517202	Conflicting_interpretations_of_pathogenicity
chr9	127854542	G	A	ENST00000373203.9:reverse	NM_001114753.3	ENG	.	c.-187C>T	UTR5	uTIS	out_of_frame_(2)	overlapping_6.28%	0.158054711246201	104/658	315	ENST00000373203.9:reverse,c.-187C>T,188,out_of_frame_(2),GTG,UTR5,non_canonical_TIS,non_TIS(GCG)_to_non_canonical_TIS(GTG),overlapping_6.28%,104[/658](aa),315,127854355,127854543,127843188,127815682,GCCCAGCCCCGTGTCCCTGTGTC,0.602171359597071,c.-188,c.125,weak,TGA,NM_001114753.3	NA	NA	NA	NA	NA	NA	NA	NA	GTG	non_canonical_TIS	non_TIS(GCG)_to_non_canonical_TIS(GTG)	TGA	127854355	127815682	127854543	127843188	GCCCAGCCCCGTGTCCCTGTGTC	0.602171359597071	weak	c.-188	c.125	.	.	.	.	.
chr9	127854541	C	T	ENST00000373203.9:reverse	NM_001114753.3	ENG	rs569618819	c.-186G>A	UTR5	uTIS	in_frame	elongated_CDS	1.09422492401216	720/658	2163	ENST00000373203.9:reverse,c.-186G>A,186,in_frame,ATC,UTR5,non_canonical_TIS,non_TIS(GTC)_to_non_canonical_TIS(ATC),elongated_CDS,720[/658](aa),2163,127854355,127854541,127815684,127815682,CCAGCCCCGCATCCCTGTGTCCA,0.59683098680123,c.-186,c.1975,moderate,TAG,NM_001114753.3	NA	NA	NA	NA	NA	NA	NA	NA	ATC	non_canonical_TIS	non_TIS(GTC)_to_non_canonical_TIS(ATC)	TAG	127854355	127815682	127854541	127815684	CCAGCCCCGCATCCCTGTGTCCA	0.59683098680123	weak	c.-186	c.1975	0.0008	0.0015	Telangiectasia,_hereditary_hemorrhagic,_type_1|Hereditary_hemorrhagic_telangiectasia	MONDO:MONDO:0008535,MedGen:C4551861,OMIM:187300|MONDO:MONDO:0019180,MedGen:C0039445,OMIM:PS187300,Orphanet:ORPHA774,SNOMED_CT:21877004	Benign/Likely_benign
chr9	127854539	G	C	ENST00000373203.9:reverse	NM_001114753.3	ENG	.	c.-184C>G	UTR5	uTIS	in_frame	elongated_CDS	1.09422492401216	720/658	2163	ENST00000373203.9:reverse,c.-184C>G,186,in_frame,GTG,UTR5,non_canonical_TIS,non_TIS(GTC)_to_non_canonical_TIS(GTG),elongated_CDS,720[/658](aa),2163,127854355,127854541,127815684,127815682,CCAGCCCCGCGTGCCTGTGTCCA,0.59683098680123,c.-186,c.1975,moderate,TAG,NM_001114753.3	NA	NA	NA	NA	NA	NA	NA	NA	GTG	non_canonical_TIS	non_TIS(GTC)_to_non_canonical_TIS(GTG)	TAG	127854355	127815682	127854541	127815684	CCAGCCCCGCGTGCCTGTGTCCA	0.59683098680123	weak	c.-186	c.1975	.	.	.	.	.
chr9	127854537	G	A	ENST00000373203.9:reverse	NM_001114753.3	ENG	.	c.-182C>T	UTR5	uTIS	out_of_frame_(2)	overlapping_6.28%	0.155015197568389	102/658	309	ENST00000373203.9:reverse,c.-182C>T,182,out_of_frame_(2),TTG,UTR5,non_canonical_TIS,non_canonical_TIS(CTG)_to_non_canonical_TIS(TTG),overlapping_6.28%,102[/658](aa),309,127854355,127854537,127843188,127815682,CCCCGCGTCCTTGTGTCCACTTC,0.57118544253617,c.-182,c.125,weak,TGA,NM_001114753.3	NA	NA	NA	NA	NA	NA	NA	NA	TTG	non_canonical_TIS	non_canonical_TIS(CTG)_to_non_canonical_TIS(TTG)	TGA	127854355	127815682	127854537	127843188	CCCCGCGTCCTTGTGTCCACTTC	0.57118544253617	weak	c.-182	c.125	.	.	.	.	.
chr9	127854537	G	C	ENST00000373203.9:reverse	NM_001114753.3	ENG	.	c.-182C>G	UTR5	uTIS	out_of_frame_(2)	overlapping_6.28%	0.155015197568389	102/658	309	ENST00000373203.9:reverse,c.-182C>G,182,out_of_frame_(2),GTG,UTR5,non_canonical_TIS,non_canonical_TIS(CTG)_to_non_canonical_TIS(GTG),overlapping_6.28%,102[/658](aa),309,127854355,127854537,127843188,127815682,CCCCGCGTCCGTGTGTCCACTTC,0.57118544253617,c.-182,c.125,weak,TGA,NM_001114753.3	NA	NA	NA	NA	NA	NA	NA	NA	GTG	non_canonical_TIS	non_canonical_TIS(CTG)_to_non_canonical_TIS(GTG)	TGA	127854355	127815682	127854537	127843188	CCCCGCGTCCGTGTGTCCACTTC	0.57118544253617	weak	c.-182	c.125	.	.	.	.	.
chr9	127854537	G	T	ENST00000373203.9:reverse	NM_001114753.3	ENG	.	c.-182C>A	UTR5	uTIS	out_of_frame_(2)	overlapping_6.28%	0.155015197568389	102/658	309	ENST00000373203.9:reverse,c.-182C>A,182,out_of_frame_(2),ATG,UTR5,canonical_TIS,non_canonical_TIS(CTG)_to_canonical_TIS(ATG),overlapping_6.28%,102[/658](aa),309,127854355,127854537,127843188,127815682,CCCCGCGTCCATGTGTCCACTTC,0.57118544253617,c.-182,c.125,weak,TGA,NM_001114753.3	NA	NA	NA	NA	NA	NA	NA	NA	ATG	canonical_TIS	non_canonical_TIS(CTG)_to_canonical_TIS(ATG)	TGA	127854355	127815682	127854537	127843188	CCCCGCGTCCATGTGTCCACTTC	0.57118544253617	weak	c.-182	c.125	.	.	.	.	.
chr9	127854535	C	A	ENST00000373203.9:reverse	NM_001114753.3	ENG	.	c.-180G>T	UTR5	uTIS	in_frame	elongated_CDS	1.09118541033435	718/658	2157	ENST00000373203.9:reverse,c.-180G>T,180,in_frame,TTG,UTR5,non_canonical_TIS,non_canonical_TIS(GTG)_to_non_canonical_TIS(TTG),elongated_CDS,718[/658](aa),2157,127854355,127854535,127815684,127815682,CCGCGTCCCTTTGTCCACTTCTC,0.520074655977171,c.-180,c.1975,weak,TAG,NM_001114753.3	NA	NA	NA	NA	NA	NA	NA	NA	TTG	non_canonical_TIS	non_canonical_TIS(GTG)_to_non_canonical_TIS(TTG)	TAG	127854355	127815682	127854535	127815684	CCGCGTCCCTTTGTCCACTTCTC	0.520074655977171	weak	c.-180	c.1975	.	.	.	.	.
chr9	127854535	C	G	ENST00000373203.9:reverse	NM_001114753.3	ENG	.	c.-180G>C	UTR5	uTIS	in_frame	elongated_CDS	1.09118541033435	718/658	2157	ENST00000373203.9:reverse,c.-180G>C,180,in_frame,CTG,UTR5,non_canonical_TIS,non_canonical_TIS(GTG)_to_non_canonical_TIS(CTG),elongated_CDS,718[/658](aa),2157,127854355,127854535,127815684,127815682,CCGCGTCCCTCTGTCCACTTCTC,0.520074655977171,c.-180,c.1975,weak,TAG,NM_001114753.3	NA	NA	NA	NA	NA	NA	NA	NA	CTG	non_canonical_TIS	non_canonical_TIS(GTG)_to_non_canonical_TIS(CTG)	TAG	127854355	127815682	127854535	127815684	CCGCGTCCCTCTGTCCACTTCTC	0.520074655977171	weak	c.-180	c.1975	.	.	.	.	.
chr9	127854535	C	T	ENST00000373203.9:reverse	NM_001114753.3	ENG	.	c.-180G>A	UTR5	uTIS	in_frame	elongated_CDS	1.09118541033435	718/658	2157	ENST00000373203.9:reverse,c.-180G>A,180,in_frame,ATG,UTR5,canonical_TIS,non_canonical_TIS(GTG)_to_canonical_TIS(ATG),elongated_CDS,718[/658](aa),2157,127854355,127854535,127815684,127815682,CCGCGTCCCTATGTCCACTTCTC,0.520074655977171,c.-180,c.1975,weak,TAG,NM_001114753.3	NA	NA	NA	NA	NA	NA	NA	NA	ATG	canonical_TIS	non_canonical_TIS(GTG)_to_canonical_TIS(ATG)	TAG	127854355	127815682	127854535	127815684	CCGCGTCCCTATGTCCACTTCTC	0.520074655977171	weak	c.-180	c.1975	.	.	.	.	.
chr9	127854533	C	T	ENST00000373203.9:reverse	NM_001114753.3	ENG	.	c.-178G>A	UTR5	uTIS	out_of_frame_(1)	not_overlapping	0.0060790273556231	4/658	15	ENST00000373203.9:reverse,c.-178G>A,178,out_of_frame_(1),ATC,UTR5,non_canonical_TIS,non_TIS(GTC)_to_non_canonical_TIS(ATC),not_overlapping,4[/658](aa),15,127854355,127854533,127854521,127815682,GCGTCCCTGTATCCACTTCTCCT,0.422359157630133,c.-178,c.-166,weak,TGA,NM_001114753.3	NA	NA	NA	NA	NA	NA	NA	NA	ATC	non_canonical_TIS	non_TIS(GTC)_to_non_canonical_TIS(ATC)	TGA	127854355	127815682	127854533	127854521	GCGTCCCTGTATCCACTTCTCCT	0.422359157630133	weak	c.-178	c.-166	.	.	.	.	.
chr9	127854531	G	C	ENST00000373203.9:reverse	NM_001114753.3	ENG	rs898517871	c.-176C>G	UTR5	uTIS	out_of_frame_(1)	not_overlapping	0.0060790273556231	4/658	15	ENST00000373203.9:reverse,c.-176C>G,178,out_of_frame_(1),GTG,UTR5,non_canonical_TIS,non_TIS(GTC)_to_non_canonical_TIS(GTG),not_overlapping,4[/658](aa),15,127854355,127854533,127854521,127815682,GCGTCCCTGTGTGCACTTCTCCT,0.422359157630133,c.-178,c.-166,weak,TGA,NM_001114753.3	NA	NA	NA	NA	NA	NA	NA	NA	GTG	non_canonical_TIS	non_TIS(GTC)_to_non_canonical_TIS(GTG)	TGA	127854355	127815682	127854533	127854521	GCGTCCCTGTGTGCACTTCTCCT	0.422359157630133	weak	c.-178	c.-166	.	.	.	.	.
chr9	127854528	G	A	ENST00000373203.9:reverse	NM_001114753.3	ENG	.	c.-173C>T	UTR5	uTIS	in_frame	elongated_CDS	1.08814589665653	716/658	2151	ENST00000373203.9:reverse,c.-173C>T,174,in_frame,ATT,UTR5,non_canonical_TIS,non_TIS(ACT)_to_non_canonical_TIS(ATT),elongated_CDS,716[/658](aa),2151,127854355,127854529,127815684,127815682,CCCTGTGTCCATTTCTCCTGACC,0.602171359597071,c.-174,c.1975,weak,TAG,NM_001114753.3	NA	NA	NA	NA	NA	NA	NA	NA	ATT	non_canonical_TIS	non_TIS(ACT)_to_non_canonical_TIS(ATT)	TAG	127854355	127815682	127854529	127815684	CCCTGTGTCCATTTCTCCTGACC	0.602171359597071	weak	c.-174	c.1975	.	.	.	.	.
chr9	127854528	G	T	ENST00000373203.9:reverse	NM_001114753.3	ENG	.	c.-173C>A	UTR5	uTIS	out_of_frame_(2)	overlapping_6.28%	0.150455927051672	99/658	300	ENST00000373203.9:reverse,c.-173C>A,173,out_of_frame_(2),ATT,UTR5,non_canonical_TIS,non_TIS(CTT)_to_non_canonical_TIS(ATT),overlapping_6.28%,99[/658](aa),300,127854355,127854528,127843188,127815682,CCTGTGTCCAATTCTCCTGACCC,0.436267601800635,c.-173,c.125,weak,TGA,NM_001114753.3	NA	NA	NA	NA	NA	NA	NA	NA	ATT	non_canonical_TIS	non_TIS(CTT)_to_non_canonical_TIS(ATT)	TGA	127854355	127815682	127854528	127843188	CCTGTGTCCAATTCTCCTGACCC	0.436267601800635	weak	c.-173	c.125	6.571e-06	1.47e-05	.	.	.
chr9	127854527	A	C	ENST00000373203.9:reverse	NM_001114753.3	ENG	.	c.-172T>G	UTR5	uTIS	in_frame	elongated_CDS	1.08814589665653	716/658	2151	ENST00000373203.9:reverse,c.-172T>G,174,in_frame,ACG,UTR5,non_canonical_TIS,non_TIS(ACT)_to_non_canonical_TIS(ACG),elongated_CDS,716[/658](aa),2151,127854355,127854529,127815684,127815682,CCCTGTGTCCACGTCTCCTGACC,0.602171359597071,c.-174,c.1975,weak,TAG,NM_001114753.3	NA	NA	NA	NA	NA	NA	NA	NA	ACG	non_canonical_TIS	non_TIS(ACT)_to_non_canonical_TIS(ACG)	TAG	127854355	127815682	127854529	127815684	CCCTGTGTCCACGTCTCCTGACC	0.602171359597071	weak	c.-174	c.1975	.	.	.	.	.
chr9	127854527	A	T	ENST00000373203.9:reverse	NM_001114753.3	ENG	.	c.-172T>A	UTR5	uTIS	out_of_frame_(1)	not_overlapping	0.00303951367781155	2/658	9	ENST00000373203.9:reverse,c.-172T>A,172,out_of_frame_(1),ATC,UTR5,non_canonical_TIS,non_TIS(TTC)_to_non_canonical_TIS(ATC),not_overlapping,2[/658](aa),9,127854355,127854527,127854521,127815682,CTGTGTCCACATCTCCTGACCCC,0.599530514818753,c.-172,c.-166,weak,TGA,NM_001114753.3	NA	NA	NA	NA	NA	NA	NA	NA	ATC	non_canonical_TIS	non_TIS(TTC)_to_non_canonical_TIS(ATC)	TGA	127854355	127815682	127854527	127854521	CTGTGTCCACATCTCCTGACCCC	0.599530514818753	weak	c.-172	c.-166	.	.	.	.	.
chr9	127854526	A	C	ENST00000373203.9:reverse	NM_001114753.3	ENG	.	c.-171T>G	UTR5	uTIS	out_of_frame_(2)	overlapping_6.28%	0.150455927051672	99/658	300	ENST00000373203.9:reverse,c.-171T>G,173,out_of_frame_(2),CTG,UTR5,non_canonical_TIS,non_TIS(CTT)_to_non_canonical_TIS(CTG),overlapping_6.28%,99[/658](aa),300,127854355,127854528,127843188,127815682,CCTGTGTCCACTGCTCCTGACCC,0.436267601800635,c.-173,c.125,weak,TGA,NM_001114753.3	NA	NA	NA	NA	NA	NA	NA	NA	CTG	non_canonical_TIS	non_TIS(CTT)_to_non_canonical_TIS(CTG)	TGA	127854355	127815682	127854528	127843188	CCTGTGTCCACTGCTCCTGACCC	0.436267601800635	weak	c.-173	c.125	.	.	.	.	.
chr9	127854525	G	C	ENST00000373203.9:reverse	NM_001114753.3	ENG	.	c.-170C>G	UTR5	uTIS	out_of_frame_(1)	not_overlapping	0.00303951367781155	2/658	9	ENST00000373203.9:reverse,c.-170C>G,172,out_of_frame_(1),TTG,UTR5,non_canonical_TIS,non_TIS(TTC)_to_non_canonical_TIS(TTG),not_overlapping,2[/658](aa),9,127854355,127854527,127854521,127815682,CTGTGTCCACTTGTCCTGACCCC,0.599530514818753,c.-172,c.-166,weak,TGA,NM_001114753.3	NA	NA	NA	NA	NA	NA	NA	NA	TTG	non_canonical_TIS	non_TIS(TTC)_to_non_canonical_TIS(TTG)	TGA	127854355	127815682	127854527	127854521	CTGTGTCCACTTGTCCTGACCCC	0.599530514818753	weak	c.-172	c.-166	.	.	.	.	.
chr9	127854525	G	T	ENST00000373203.9:reverse	NM_001114753.3	ENG	.	c.-170C>A	UTR5	uTIS	out_of_frame_(2)	overlapping_6.28%	0.148936170212766	98/658	297	ENST00000373203.9:reverse,c.-170C>A,170,out_of_frame_(2),ATC,UTR5,non_canonical_TIS,non_TIS(CTC)_to_non_canonical_TIS(ATC),overlapping_6.28%,98[/658](aa),297,127854355,127854525,127843188,127815682,GTGTCCACTTATCCTGACCCCTC,0.408044140221798,c.-170,c.125,weak,TGA,NM_001114753.3	NA	NA	NA	NA	NA	NA	NA	NA	ATC	non_canonical_TIS	non_TIS(CTC)_to_non_canonical_TIS(ATC)	TGA	127854355	127815682	127854525	127843188	GTGTCCACTTATCCTGACCCCTC	0.408044140221798	weak	c.-170	c.125	.	.	.	.	.
chr9	127854523	G	C	ENST00000373203.9:reverse	NM_001114753.3	ENG	.	c.-168C>G	UTR5	uTIS	out_of_frame_(2)	overlapping_6.28%	0.148936170212766	98/658	297	ENST00000373203.9:reverse,c.-168C>G,170,out_of_frame_(2),CTG,UTR5,non_canonical_TIS,non_TIS(CTC)_to_non_canonical_TIS(CTG),overlapping_6.28%,98[/658](aa),297,127854355,127854525,127843188,127815682,GTGTCCACTTCTGCTGACCCCTC,0.408044140221798,c.-170,c.125,weak,TGA,NM_001114753.3	NA	NA	NA	NA	NA	NA	NA	NA	CTG	non_canonical_TIS	non_TIS(CTC)_to_non_canonical_TIS(CTG)	TGA	127854355	127815682	127854525	127843188	GTGTCCACTTCTGCTGACCCCTC	0.408044140221798	weak	c.-170	c.125	.	.	.	.	.
chr9	127854522	G	A	ENST00000373203.9:reverse	NM_001114753.3	ENG	.	c.-167C>T	UTR5	uTIS	out_of_frame_(2)	overlapping_6.28%	0.14741641337386	97/658	294	ENST00000373203.9:reverse,c.-167C>T,167,out_of_frame_(2),TTG,UTR5,non_canonical_TIS,non_canonical_TIS(CTG)_to_non_canonical_TIS(TTG),overlapping_6.28%,97[/658](aa),294,127854355,127854522,127843188,127815682,TCCACTTCTCTTGACCCCTCGGC,0.551760557119818,c.-167,c.125,weak,TGA,NM_001114753.3	NA	NA	NA	NA	NA	NA	NA	NA	TTG	non_canonical_TIS	non_canonical_TIS(CTG)_to_non_canonical_TIS(TTG)	TGA	127854355	127815682	127854522	127843188	TCCACTTCTCTTGACCCCTCGGC	0.551760557119818	weak	c.-167	c.125	.	.	.	.	.
chr9	127854522	G	C	ENST00000373203.9:reverse	NM_001114753.3	ENG	.	c.-167C>G	UTR5	uTIS	out_of_frame_(2)	overlapping_6.28%	0.14741641337386	97/658	294	ENST00000373203.9:reverse,c.-167C>G,167,out_of_frame_(2),GTG,UTR5,non_canonical_TIS,non_canonical_TIS(CTG)_to_non_canonical_TIS(GTG),overlapping_6.28%,97[/658](aa),294,127854355,127854522,127843188,127815682,TCCACTTCTCGTGACCCCTCGGC,0.551760557119818,c.-167,c.125,weak,TGA,NM_001114753.3	NA	NA	NA	NA	NA	NA	NA	NA	GTG	non_canonical_TIS	non_canonical_TIS(CTG)_to_non_canonical_TIS(GTG)	TGA	127854355	127815682	127854522	127843188	TCCACTTCTCGTGACCCCTCGGC	0.551760557119818	weak	c.-167	c.125	.	.	.	.	.
chr9	127854522	G	T	ENST00000373203.9:reverse	NM_001114753.3	ENG	.	c.-167C>A	UTR5	uTIS	out_of_frame_(2)	overlapping_6.28%	0.14741641337386	97/658	294	ENST00000373203.9:reverse,c.-167C>A,167,out_of_frame_(2),ATG,UTR5,canonical_TIS,non_canonical_TIS(CTG)_to_canonical_TIS(ATG),overlapping_6.28%,97[/658](aa),294,127854355,127854522,127843188,127815682,TCCACTTCTCATGACCCCTCGGC,0.551760557119818,c.-167,c.125,weak,TGA,NM_001114753.3	NA	NA	NA	NA	NA	NA	NA	NA	ATG	canonical_TIS	non_canonical_TIS(CTG)_to_canonical_TIS(ATG)	TGA	127854355	127815682	127854522	127843188	TCCACTTCTCATGACCCCTCGGC	0.551760557119818	weak	c.-167	c.125	.	.	.	.	.
chr9	127854518	G	A	ENST00000373203.9:reverse	NM_001114753.3	ENG	.	c.-163C>T	UTR5	uTIS	out_of_frame_(2)	overlapping_6.28%	0.145896656534954	96/658	291	ENST00000373203.9:reverse,c.-163C>T,164,out_of_frame_(2),ATC,UTR5,non_canonical_TIS,non_TIS(ACC)_to_non_canonical_TIS(ATC),overlapping_6.28%,96[/658](aa),291,127854355,127854519,127843188,127815682,ACTTCTCCTGATCCCTCGGCCGC,0.504049293364313,c.-164,c.125,weak,TGA,NM_001114753.3	NA	NA	NA	NA	NA	NA	NA	NA	ATC	non_canonical_TIS	non_TIS(ACC)_to_non_canonical_TIS(ATC)	TGA	127854355	127815682	127854519	127843188	ACTTCTCCTGATCCCTCGGCCGC	0.504049293364313	weak	c.-164	c.125	.	.	.	.	.
chr9	127854517	G	C	ENST00000373203.9:reverse	NM_001114753.3	ENG	.	c.-162C>G	UTR5	uTIS	out_of_frame_(2)	overlapping_6.28%	0.145896656534954	96/658	291	ENST00000373203.9:reverse,c.-162C>G,164,out_of_frame_(2),ACG,UTR5,non_canonical_TIS,non_TIS(ACC)_to_non_canonical_TIS(ACG),overlapping_6.28%,96[/658](aa),291,127854355,127854519,127843188,127815682,ACTTCTCCTGACGCCTCGGCCGC,0.504049293364313,c.-164,c.125,weak,TGA,NM_001114753.3	NA	NA	NA	NA	NA	NA	NA	NA	ACG	non_canonical_TIS	non_TIS(ACC)_to_non_canonical_TIS(ACG)	TGA	127854355	127815682	127854519	127843188	ACTTCTCCTGACGCCTCGGCCGC	0.504049293364313	weak	c.-164	c.125	.	.	.	.	.
chr9	127854515	G	T	ENST00000373203.9:reverse	NM_001114753.3	ENG	.	c.-160C>A	UTR5	uTIS	out_of_frame_(1)	not_overlapping	0.0638297872340425	42/658	129	ENST00000373203.9:reverse,c.-160C>A,160,out_of_frame_(1),ATC,UTR5,non_canonical_TIS,non_TIS(CTC)_to_non_canonical_TIS(ATC),not_overlapping,42[/658](aa),129,127854355,127854515,127854389,127815682,CTCCTGACCCATCGGCCGCCACC,0.647887318290022,c.-160,c.-34,weak,TAA,NM_001114753.3	NA	NA	NA	NA	NA	NA	NA	NA	ATC	non_canonical_TIS	non_TIS(CTC)_to_non_canonical_TIS(ATC)	TAA	127854355	127815682	127854515	127854389	CTCCTGACCCATCGGCCGCCACC	0.647887318290022	moderate	c.-160	c.-34	.	.	.	.	.
chr9	127854514	A	T	ENST00000373203.9:reverse	NM_001114753.3	ENG	.	c.-159T>A	UTR5	uTIS	in_frame	elongated_CDS	1.08054711246201	711/658	2136	ENST00000373203.9:reverse,c.-159T>A,159,in_frame,ACG,UTR5,non_canonical_TIS,non_TIS(TCG)_to_non_canonical_TIS(ACG),elongated_CDS,711[/658](aa),2136,127854355,127854514,127815684,127815682,TCCTGACCCCACGGCCGCCACCC,0.740669009050883,c.-159,c.1975,moderate,TAG,NM_001114753.3	NA	NA	NA	NA	NA	NA	NA	NA	ACG	non_canonical_TIS	non_TIS(TCG)_to_non_canonical_TIS(ACG)	TAG	127854355	127815682	127854514	127815684	TCCTGACCCCACGGCCGCCACCC	0.740669009050883	moderate	c.-159	c.1975	.	.	.	.	.
chr9	127854513	G	A	ENST00000373203.9:reverse	NM_001114753.3	ENG	rs41470844	c.-158C>T	UTR5	uTIS	in_frame	elongated_CDS	1.08054711246201	711/658	2136	ENST00000373203.9:reverse,c.-158C>T,159,in_frame,TTG,UTR5,non_canonical_TIS,non_TIS(TCG)_to_non_canonical_TIS(TTG),elongated_CDS,711[/658](aa),2136,127854355,127854514,127815684,127815682,TCCTGACCCCTTGGCCGCCACCC,0.740669009050883,c.-159,c.1975,moderate,TAG,NM_001114753.3	NA	NA	NA	NA	NA	NA	NA	NA	TTG	non_canonical_TIS	non_TIS(TCG)_to_non_canonical_TIS(TTG)	TAG	127854355	127815682	127854514	127815684	TCCTGACCCCTTGGCCGCCACCC	0.740669009050883	moderate	c.-159	c.1975	0.0007	0.0026	Telangiectasia,_hereditary_hemorrhagic,_type_1	MONDO:MONDO:0008535,MedGen:C4551861,OMIM:187300	Likely_benign
chr9	127854513	G	C	ENST00000373203.9:reverse	NM_001114753.3	ENG	.	c.-158C>G	UTR5	uTIS	out_of_frame_(1)	not_overlapping	0.0638297872340425	42/658	129	ENST00000373203.9:reverse,c.-158C>G,160,out_of_frame_(1),CTG,UTR5,non_canonical_TIS,non_TIS(CTC)_to_non_canonical_TIS(CTG),not_overlapping,42[/658](aa),129,127854355,127854515,127854389,127815682,CTCCTGACCCCTGGGCCGCCACC,0.647887318290022,c.-160,c.-34,weak,TAA,NM_001114753.3	NA	NA	NA	NA	NA	NA	NA	NA	CTG	non_canonical_TIS	non_TIS(CTC)_to_non_canonical_TIS(CTG)	TAA	127854355	127815682	127854515	127854389	CTCCTGACCCCTGGGCCGCCACC	0.647887318290022	moderate	c.-160	c.-34	.	.	.	.	.
chr9	127854513	G	T	ENST00000373203.9:reverse	NM_001114753.3	ENG	.	c.-158C>A	UTR5	uTIS	out_of_frame_(2)	overlapping_6.28%	0.142857142857143	94/658	285	ENST00000373203.9:reverse,c.-158C>A,158,out_of_frame_(2),AGG,UTR5,non_canonical_TIS,non_TIS(CGG)_to_non_canonical_TIS(AGG),overlapping_6.28%,94[/658](aa),285,127854355,127854513,127843188,127815682,CCTGACCCCTAGGCCGCCACCCC,0.509683095736461,c.-158,c.125,weak,TGA,NM_001114753.3	NA	NA	NA	NA	NA	NA	NA	NA	AGG	non_canonical_TIS	non_TIS(CGG)_to_non_canonical_TIS(AGG)	TGA	127854355	127815682	127854513	127843188	CCTGACCCCTAGGCCGCCACCCC	0.509683095736461	weak	c.-158	c.125	.	.	.	.	.
chr9	127854512	C	A	ENST00000373203.9:reverse	NM_001114753.3	ENG	.	c.-157G>T	UTR5	uTIS	out_of_frame_(2)	overlapping_6.28%	0.142857142857143	94/658	285	ENST00000373203.9:reverse,c.-157G>T,158,out_of_frame_(2),CTG,UTR5,non_canonical_TIS,non_TIS(CGG)_to_non_canonical_TIS(CTG),overlapping_6.28%,94[/658](aa),285,127854355,127854513,127843188,127815682,CCTGACCCCTCTGCCGCCACCCC,0.509683095736461,c.-158,c.125,weak,TGA,NM_001114753.3	NA	NA	NA	NA	NA	NA	NA	NA	CTG	non_canonical_TIS	non_TIS(CGG)_to_non_canonical_TIS(CTG)	TGA	127854355	127815682	127854513	127843188	CCTGACCCCTCTGCCGCCACCCC	0.509683095736461	weak	c.-158	c.125	.	.	.	.	.
chr9	127854510	G	T	ENST00000373203.9:reverse	NM_001114753.3	ENG	.	c.-155C>A	UTR5	uTIS	out_of_frame_(2)	overlapping_6.28%	0.141337386018237	93/658	282	ENST00000373203.9:reverse,c.-155C>A,155,out_of_frame_(2),ACG,UTR5,non_canonical_TIS,non_TIS(CCG)_to_non_canonical_TIS(ACG),overlapping_6.28%,93[/658](aa),282,127854355,127854510,127843188,127815682,GACCCCTCGGACGCCACCCCAGA,0.503873235618528,c.-155,c.125,weak,TGA,NM_001114753.3	NA	NA	NA	NA	NA	NA	NA	NA	ACG	non_canonical_TIS	non_TIS(CCG)_to_non_canonical_TIS(ACG)	TGA	127854355	127815682	127854510	127843188	GACCCCTCGGACGCCACCCCAGA	0.503873235618528	weak	c.-155	c.125	.	.	.	.	.
chr9	127854509	G	A	ENST00000373203.9:reverse	NM_001114753.3	ENG	.	c.-154C>T	UTR5	uTIS	out_of_frame_(2)	overlapping_6.28%	0.141337386018237	93/658	282	ENST00000373203.9:reverse,c.-154C>T,155,out_of_frame_(2),CTG,UTR5,non_canonical_TIS,non_TIS(CCG)_to_non_canonical_TIS(CTG),overlapping_6.28%,93[/658](aa),282,127854355,127854510,127843188,127815682,GACCCCTCGGCTGCCACCCCAGA,0.503873235618528,c.-155,c.125,weak,TGA,NM_001114753.3	NA	NA	NA	NA	NA	NA	NA	NA	CTG	non_canonical_TIS	non_TIS(CCG)_to_non_canonical_TIS(CTG)	TGA	127854355	127815682	127854510	127843188	GACCCCTCGGCTGCCACCCCAGA	0.503873235618528	weak	c.-155	c.125	3.942e-05	0.0008	.	.	.
chr9	127854504	G	A	ENST00000373203.9:reverse	NM_001114753.3	ENG	.	c.-149C>T	UTR5	uTIS	in_frame	elongated_CDS	1.07598784194529	708/658	2127	ENST00000373203.9:reverse,c.-149C>T,150,in_frame,ATC,UTR5,non_canonical_TIS,non_TIS(ACC)_to_non_canonical_TIS(ATC),elongated_CDS,708[/658](aa),2127,127854355,127854505,127815684,127815682,CTCGGCCGCCATCCCAGAAGGCT,0.757746476589169,c.-150,c.1975,strong,TAG,NM_001114753.3	NA	NA	NA	NA	NA	NA	NA	NA	ATC	non_canonical_TIS	non_TIS(ACC)_to_non_canonical_TIS(ATC)	TAG	127854355	127815682	127854505	127815684	CTCGGCCGCCATCCCAGAAGGCT	0.757746476589169	moderate	c.-150	c.1975	.	.	.	.	.
chr9	127854503	G	C	ENST00000373203.9:reverse	NM_001114753.3	ENG	.	c.-148C>G	UTR5	uTIS	in_frame	elongated_CDS	1.07598784194529	708/658	2127	ENST00000373203.9:reverse,c.-148C>G,150,in_frame,ACG,UTR5,non_canonical_TIS,non_TIS(ACC)_to_non_canonical_TIS(ACG),elongated_CDS,708[/658](aa),2127,127854355,127854505,127815684,127815682,CTCGGCCGCCACGCCAGAAGGCT,0.757746476589169,c.-150,c.1975,strong,TAG,NM_001114753.3	NA	NA	NA	NA	NA	NA	NA	NA	ACG	non_canonical_TIS	non_TIS(ACC)_to_non_canonical_TIS(ACG)	TAG	127854355	127815682	127854505	127815684	CTCGGCCGCCACGCCAGAAGGCT	0.757746476589169	moderate	c.-150	c.1975	.	.	.	.	.
chr9	127854501	G	T	ENST00000373203.9:reverse	NM_001114753.3	ENG	.	c.-146C>A	UTR5	uTIS	out_of_frame_(2)	overlapping_6.28%	0.13677811550152	90/658	273	ENST00000373203.9:reverse,c.-146C>A,146,out_of_frame_(2),AAG,UTR5,non_canonical_TIS,non_TIS(CAG)_to_non_canonical_TIS(AAG),overlapping_6.28%,90[/658](aa),273,127854355,127854501,127843188,127815682,GCCGCCACCCAAGAAGGCTGGAG,0.630809856103849,c.-146,c.125,moderate,TGA,NM_001114753.3	NA	NA	NA	NA	NA	NA	NA	NA	AAG	non_canonical_TIS	non_TIS(CAG)_to_non_canonical_TIS(AAG)	TGA	127854355	127815682	127854501	127843188	GCCGCCACCCAAGAAGGCTGGAG	0.630809856103849	weak	c.-146	c.125	.	.	.	.	.
chr9	127854500	T	A	ENST00000373203.9:reverse	NM_001114753.3	ENG	.	c.-145A>T	UTR5	uTIS	out_of_frame_(2)	overlapping_6.28%	0.13677811550152	90/658	273	ENST00000373203.9:reverse,c.-145A>T,146,out_of_frame_(2),CTG,UTR5,non_canonical_TIS,non_TIS(CAG)_to_non_canonical_TIS(CTG),overlapping_6.28%,90[/658](aa),273,127854355,127854501,127843188,127815682,GCCGCCACCCCTGAAGGCTGGAG,0.630809856103849,c.-146,c.125,moderate,TGA,NM_001114753.3	NA	NA	NA	NA	NA	NA	NA	NA	CTG	non_canonical_TIS	non_TIS(CAG)_to_non_canonical_TIS(CTG)	TGA	127854355	127815682	127854501	127843188	GCCGCCACCCCTGAAGGCTGGAG	0.630809856103849	weak	c.-146	c.125	.	.	.	.	.
chr9	127854499	C	A	ENST00000373203.9:reverse	NM_001114753.3	ENG	.	c.-144G>T	UTR5	uTIS	out_of_frame_(1)	not_overlapping	0.0562310030395137	37/658	114	ENST00000373203.9:reverse,c.-144G>T,145,out_of_frame_(1),ATA,UTR5,non_canonical_TIS,non_TIS(AGA)_to_non_canonical_TIS(ATA),not_overlapping,37[/658](aa),114,127854355,127854500,127854389,127815682,CCGCCACCCCATAAGGCTGGAGC,0.616725348835449,c.-145,c.-34,weak,TAA,NM_001114753.3	NA	NA	NA	NA	NA	NA	NA	NA	ATA	non_canonical_TIS	non_TIS(AGA)_to_non_canonical_TIS(ATA)	TAA	127854355	127815682	127854500	127854389	CCGCCACCCCATAAGGCTGGAGC	0.616725348835449	weak	c.-145	c.-34	.	.	.	.	.
chr9	127854498	T	C	ENST00000373203.9:reverse	NM_001114753.3	ENG	.	c.-143A>G	UTR5	uTIS	out_of_frame_(1)	not_overlapping	0.0562310030395137	37/658	114	ENST00000373203.9:reverse,c.-143A>G,145,out_of_frame_(1),AGG,UTR5,non_canonical_TIS,non_TIS(AGA)_to_non_canonical_TIS(AGG),not_overlapping,37[/658](aa),114,127854355,127854500,127854389,127815682,CCGCCACCCCAGGAGGCTGGAGC,0.616725348835449,c.-145,c.-34,weak,TAA,NM_001114753.3	NA	NA	NA	NA	NA	NA	NA	NA	AGG	non_canonical_TIS	non_TIS(AGA)_to_non_canonical_TIS(AGG)	TAA	127854355	127815682	127854500	127854389	CCGCCACCCCAGGAGGCTGGAGC	0.616725348835449	weak	c.-145	c.-34	.	.	.	.	.
chr9	127854497	T	A	ENST00000373203.9:reverse	NM_001114753.3	ENG	.	c.-142A>T	UTR5	uTIS	out_of_frame_(2)	overlapping_6.28%	0.135258358662614	89/658	270	ENST00000373203.9:reverse,c.-142A>T,143,out_of_frame_(2),ATG,UTR5,canonical_TIS,non_canonical_TIS(AAG)_to_canonical_TIS(ATG),overlapping_6.28%,89[/658](aa),270,127854355,127854498,127843188,127815682,GCCACCCCAGATGGCTGGAGCAG,0.656161973468657,c.-143,c.125,moderate,TGA,NM_001114753.3	NA	NA	NA	NA	NA	NA	NA	NA	ATG	canonical_TIS	non_canonical_TIS(AAG)_to_canonical_TIS(ATG)	TGA	127854355	127815682	127854498	127843188	GCCACCCCAGATGGCTGGAGCAG	0.656161973468657	moderate	c.-143	c.125	.	.	.	.	.
chr9	127854497	T	C	ENST00000373203.9:reverse	NM_001114753.3	ENG	.	c.-142A>G	UTR5	uTIS	out_of_frame_(2)	overlapping_6.28%	0.135258358662614	89/658	270	ENST00000373203.9:reverse,c.-142A>G,143,out_of_frame_(2),AGG,UTR5,non_canonical_TIS,non_canonical_TIS(AAG)_to_non_canonical_TIS(AGG),overlapping_6.28%,89[/658](aa),270,127854355,127854498,127843188,127815682,GCCACCCCAGAGGGCTGGAGCAG,0.656161973468657,c.-143,c.125,moderate,TGA,NM_001114753.3	NA	NA	NA	NA	NA	NA	NA	NA	AGG	non_canonical_TIS	non_canonical_TIS(AAG)_to_non_canonical_TIS(AGG)	TGA	127854355	127815682	127854498	127843188	GCCACCCCAGAGGGCTGGAGCAG	0.656161973468657	moderate	c.-143	c.125	.	.	.	.	.
chr9	127854497	T	G	ENST00000373203.9:reverse	NM_001114753.3	ENG	.	c.-142A>C	UTR5	uTIS	out_of_frame_(2)	overlapping_6.28%	0.135258358662614	89/658	270	ENST00000373203.9:reverse,c.-142A>C,143,out_of_frame_(2),ACG,UTR5,non_canonical_TIS,non_canonical_TIS(AAG)_to_non_canonical_TIS(ACG),overlapping_6.28%,89[/658](aa),270,127854355,127854498,127843188,127815682,GCCACCCCAGACGGCTGGAGCAG,0.656161973468657,c.-143,c.125,moderate,TGA,NM_001114753.3	NA	NA	NA	NA	NA	NA	NA	NA	ACG	non_canonical_TIS	non_canonical_TIS(AAG)_to_non_canonical_TIS(ACG)	TGA	127854355	127815682	127854498	127843188	GCCACCCCAGACGGCTGGAGCAG	0.656161973468657	moderate	c.-143	c.125	.	.	.	.	.
chr9	127854496	C	A	ENST00000373203.9:reverse	NM_001114753.3	ENG	.	c.-141G>T	UTR5	uTIS	out_of_frame_(1)	not_overlapping	0.0547112462006079	36/658	111	ENST00000373203.9:reverse,c.-141G>T,142,out_of_frame_(1),ATG,UTR5,canonical_TIS,non_canonical_TIS(AGG)_to_canonical_TIS(ATG),not_overlapping,36[/658](aa),111,127854355,127854497,127854389,127815682,CCACCCCAGAATGCTGGAGCAGG,0.687147890529558,c.-142,c.-34,strong,TAA,NM_001114753.3	NA	NA	NA	NA	NA	NA	NA	NA	ATG	canonical_TIS	non_canonical_TIS(AGG)_to_canonical_TIS(ATG)	TAA	127854355	127815682	127854497	127854389	CCACCCCAGAATGCTGGAGCAGG	0.687147890529558	moderate	c.-142	c.-34	.	.	.	.	.
chr9	127854496	C	G	ENST00000373203.9:reverse	NM_001114753.3	ENG	.	c.-141G>C	UTR5	uTIS	out_of_frame_(1)	not_overlapping	0.0547112462006079	36/658	111	ENST00000373203.9:reverse,c.-141G>C,142,out_of_frame_(1),ACG,UTR5,non_canonical_TIS,non_canonical_TIS(AGG)_to_non_canonical_TIS(ACG),not_overlapping,36[/658](aa),111,127854355,127854497,127854389,127815682,CCACCCCAGAACGCTGGAGCAGG,0.687147890529558,c.-142,c.-34,strong,TAA,NM_001114753.3	NA	NA	NA	NA	NA	NA	NA	NA	ACG	non_canonical_TIS	non_canonical_TIS(AGG)_to_non_canonical_TIS(ACG)	TAA	127854355	127815682	127854497	127854389	CCACCCCAGAACGCTGGAGCAGG	0.687147890529558	moderate	c.-142	c.-34	6.571e-06	2.413e-05	.	.	.
chr9	127854496	C	T	ENST00000373203.9:reverse	NM_001114753.3	ENG	.	c.-141G>A	UTR5	uTIS	out_of_frame_(1)	not_overlapping	0.0547112462006079	36/658	111	ENST00000373203.9:reverse,c.-141G>A,142,out_of_frame_(1),AAG,UTR5,non_canonical_TIS,non_canonical_TIS(AGG)_to_non_canonical_TIS(AAG),not_overlapping,36[/658](aa),111,127854355,127854497,127854389,127815682,CCACCCCAGAAAGCTGGAGCAGG,0.687147890529558,c.-142,c.-34,strong,TAA,NM_001114753.3	NA	NA	NA	NA	NA	NA	NA	NA	AAG	non_canonical_TIS	non_canonical_TIS(AGG)_to_non_canonical_TIS(AAG)	TAA	127854355	127815682	127854497	127854389	CCACCCCAGAAAGCTGGAGCAGG	0.687147890529558	moderate	c.-142	c.-34	.	.	.	.	.
chr9	127854494	G	A	ENST00000373203.9:reverse	NM_001114753.3	ENG	.	c.-139C>T	UTR5	uTIS	out_of_frame_(1)	not_overlapping	0.0531914893617021	35/658	108	ENST00000373203.9:reverse,c.-139C>T,139,out_of_frame_(1),TTG,UTR5,non_canonical_TIS,non_canonical_TIS(CTG)_to_non_canonical_TIS(TTG),not_overlapping,35[/658](aa),108,127854355,127854494,127854389,127815682,CCCCAGAAGGTTGGAGCAGGGAC,0.782922533532137,c.-139,c.-34,moderate,TAA,NM_001114753.3	NA	NA	NA	NA	NA	NA	NA	NA	TTG	non_canonical_TIS	non_canonical_TIS(CTG)_to_non_canonical_TIS(TTG)	TAA	127854355	127815682	127854494	127854389	CCCCAGAAGGTTGGAGCAGGGAC	0.782922533532137	strong	c.-139	c.-34	.	.	.	.	.
chr9	127854494	G	C	ENST00000373203.9:reverse	NM_001114753.3	ENG	.	c.-139C>G	UTR5	uTIS	out_of_frame_(1)	not_overlapping	0.0531914893617021	35/658	108	ENST00000373203.9:reverse,c.-139C>G,139,out_of_frame_(1),GTG,UTR5,non_canonical_TIS,non_canonical_TIS(CTG)_to_non_canonical_TIS(GTG),not_overlapping,35[/658](aa),108,127854355,127854494,127854389,127815682,CCCCAGAAGGGTGGAGCAGGGAC,0.782922533532137,c.-139,c.-34,moderate,TAA,NM_001114753.3	NA	NA	NA	NA	NA	NA	NA	NA	GTG	non_canonical_TIS	non_canonical_TIS(CTG)_to_non_canonical_TIS(GTG)	TAA	127854355	127815682	127854494	127854389	CCCCAGAAGGGTGGAGCAGGGAC	0.782922533532137	strong	c.-139	c.-34	.	.	.	.	.
chr9	127854494	G	T	ENST00000373203.9:reverse	NM_001114753.3	ENG	.	c.-139C>A	UTR5	uTIS	out_of_frame_(1)	not_overlapping	0.0531914893617021	35/658	108	ENST00000373203.9:reverse,c.-139C>A,139,out_of_frame_(1),ATG,UTR5,canonical_TIS,non_canonical_TIS(CTG)_to_canonical_TIS(ATG),not_overlapping,35[/658](aa),108,127854355,127854494,127854389,127815682,CCCCAGAAGGATGGAGCAGGGAC,0.782922533532137,c.-139,c.-34,moderate,TAA,NM_001114753.3	NA	NA	NA	NA	NA	NA	NA	NA	ATG	canonical_TIS	non_canonical_TIS(CTG)_to_canonical_TIS(ATG)	TAA	127854355	127815682	127854494	127854389	CCCCAGAAGGATGGAGCAGGGAC	0.782922533532137	strong	c.-139	c.-34	.	.	.	.	.
chr9	127854493	A	T	ENST00000373203.9:reverse	NM_001114753.3	ENG	.	c.-138T>A	UTR5	uTIS	in_frame	elongated_CDS	1.06990881458967	704/658	2115	ENST00000373203.9:reverse,c.-138T>A,138,in_frame,AGG,UTR5,non_canonical_TIS,non_TIS(TGG)_to_non_canonical_TIS(AGG),elongated_CDS,704[/658](aa),2115,127854355,127854493,127815684,127815682,CCCAGAAGGCAGGAGCAGGGACG,0.720544134200671,c.-138,c.1975,moderate,TAG,NM_001114753.3	NA	NA	NA	NA	NA	NA	NA	NA	AGG	non_canonical_TIS	non_TIS(TGG)_to_non_canonical_TIS(AGG)	TAG	127854355	127815682	127854493	127815684	CCCAGAAGGCAGGAGCAGGGACG	0.720544134200671	moderate	c.-138	c.1975	.	.	.	.	.
chr9	127854492	C	A	ENST00000373203.9:reverse	NM_001114753.3	ENG	.	c.-137G>T	UTR5	uTIS	in_frame	elongated_CDS	1.06990881458967	704/658	2115	ENST00000373203.9:reverse,c.-137G>T,138,in_frame,TTG,UTR5,non_canonical_TIS,non_TIS(TGG)_to_non_canonical_TIS(TTG),elongated_CDS,704[/658](aa),2115,127854355,127854493,127815684,127815682,CCCAGAAGGCTTGAGCAGGGACG,0.720544134200671,c.-138,c.1975,moderate,TAG,NM_001114753.3	NA	NA	NA	NA	NA	NA	NA	NA	TTG	non_canonical_TIS	non_TIS(TGG)_to_non_canonical_TIS(TTG)	TAG	127854355	127815682	127854493	127815684	CCCAGAAGGCTTGAGCAGGGACG	0.720544134200671	moderate	c.-138	c.1975	.	.	.	.	.
chr9	127854491	C	T	ENST00000373203.9:reverse	NM_001114753.3	ENG	.	c.-136G>A	UTR5	uTIS	out_of_frame_(1)	not_overlapping	0.0516717325227964	34/658	105	ENST00000373203.9:reverse,c.-136G>A,136,out_of_frame_(1),AAG,UTR5,non_canonical_TIS,non_TIS(GAG)_to_non_canonical_TIS(AAG),not_overlapping,34[/658](aa),105,127854355,127854491,127854389,127815682,CAGAAGGCTGAAGCAGGGACGCC,0.470422534201151,c.-136,c.-34,moderate,TAA,NM_001114753.3	NA	NA	NA	NA	NA	NA	NA	NA	AAG	non_canonical_TIS	non_TIS(GAG)_to_non_canonical_TIS(AAG)	TAA	127854355	127815682	127854491	127854389	CAGAAGGCTGAAGCAGGGACGCC	0.470422534201151	weak	c.-136	c.-34	.	.	.	.	.
chr9	127854490	T	A	ENST00000373203.9:reverse	NM_001114753.3	ENG	.	c.-135A>T	UTR5	uTIS	out_of_frame_(1)	not_overlapping	0.0516717325227964	34/658	105	ENST00000373203.9:reverse,c.-135A>T,136,out_of_frame_(1),GTG,UTR5,non_canonical_TIS,non_TIS(GAG)_to_non_canonical_TIS(GTG),not_overlapping,34[/658](aa),105,127854355,127854491,127854389,127815682,CAGAAGGCTGGTGCAGGGACGCC,0.470422534201151,c.-136,c.-34,moderate,TAA,NM_001114753.3	NA	NA	NA	NA	NA	NA	NA	NA	GTG	non_canonical_TIS	non_TIS(GAG)_to_non_canonical_TIS(GTG)	TAA	127854355	127815682	127854491	127854389	CAGAAGGCTGGTGCAGGGACGCC	0.470422534201151	weak	c.-136	c.-34	.	.	.	.	.
chr9	127854489	C	A	ENST00000373203.9:reverse	NM_001114753.3	ENG	.	c.-134G>T	UTR5	uTIS	in_frame	elongated_CDS	1.06838905775076	703/658	2112	ENST00000373203.9:reverse,c.-134G>T,135,in_frame,ATC,UTR5,non_canonical_TIS,non_TIS(AGC)_to_non_canonical_TIS(ATC),elongated_CDS,703[/658](aa),2112,127854355,127854490,127815684,127815682,AGAAGGCTGGATCAGGGACGCCG,0.569014079727832,c.-135,c.1975,moderate,TAG,NM_001114753.3	NA	NA	NA	NA	NA	NA	NA	NA	ATC	non_canonical_TIS	non_TIS(AGC)_to_non_canonical_TIS(ATC)	TAG	127854355	127815682	127854490	127815684	AGAAGGCTGGATCAGGGACGCCG	0.569014079727832	weak	c.-135	c.1975	.	.	.	.	.
chr9	127854488	G	C	ENST00000373203.9:reverse	NM_001114753.3	ENG	.	c.-133C>G	UTR5	uTIS	in_frame	elongated_CDS	1.06838905775076	703/658	2112	ENST00000373203.9:reverse,c.-133C>G,135,in_frame,AGG,UTR5,non_canonical_TIS,non_TIS(AGC)_to_non_canonical_TIS(AGG),elongated_CDS,703[/658](aa),2112,127854355,127854490,127815684,127815682,AGAAGGCTGGAGGAGGGACGCCG,0.569014079727832,c.-135,c.1975,moderate,TAG,NM_001114753.3	NA	NA	NA	NA	NA	NA	NA	NA	AGG	non_canonical_TIS	non_TIS(AGC)_to_non_canonical_TIS(AGG)	TAG	127854355	127815682	127854490	127815684	AGAAGGCTGGAGGAGGGACGCCG	0.569014079727832	weak	c.-135	c.1975	.	.	.	.	.
chr9	127854488	G	T	ENST00000373203.9:reverse	NM_001114753.3	ENG	.	c.-133C>A	UTR5	uTIS	out_of_frame_(1)	not_overlapping	0.0501519756838906	33/658	102	ENST00000373203.9:reverse,c.-133C>A,133,out_of_frame_(1),AAG,UTR5,non_canonical_TIS,non_TIS(CAG)_to_non_canonical_TIS(AAG),not_overlapping,33[/658](aa),102,127854355,127854488,127854389,127815682,AAGGCTGGAGAAGGGACGCCGTC,0.687323937571117,c.-133,c.-34,moderate,TAA,NM_001114753.3	NA	NA	NA	NA	NA	NA	NA	NA	AAG	non_canonical_TIS	non_TIS(CAG)_to_non_canonical_TIS(AAG)	TAA	127854355	127815682	127854488	127854389	AAGGCTGGAGAAGGGACGCCGTC	0.687323937571117	strong	c.-133	c.-34	.	.	.	.	.
chr9	127854487	T	A	ENST00000373203.9:reverse	NM_001114753.3	ENG	.	c.-132A>T	UTR5	uTIS	out_of_frame_(1)	not_overlapping	0.0501519756838906	33/658	102	ENST00000373203.9:reverse,c.-132A>T,133,out_of_frame_(1),CTG,UTR5,non_canonical_TIS,non_TIS(CAG)_to_non_canonical_TIS(CTG),not_overlapping,33[/658](aa),102,127854355,127854488,127854389,127815682,AAGGCTGGAGCTGGGACGCCGTC,0.687323937571117,c.-133,c.-34,moderate,TAA,NM_001114753.3	NA	NA	NA	NA	NA	NA	NA	NA	CTG	non_canonical_TIS	non_TIS(CAG)_to_non_canonical_TIS(CTG)	TAA	127854355	127815682	127854488	127854389	AAGGCTGGAGCTGGGACGCCGTC	0.687323937571117	strong	c.-133	c.-34	.	.	.	.	.
chr9	127854486	C	A	ENST00000373203.9:reverse	NM_001114753.3	ENG	.	c.-131G>T	UTR5	uTIS	in_frame	elongated_CDS	1.06686930091185	702/658	2109	ENST00000373203.9:reverse,c.-131G>T,132,in_frame,ATG,UTR5,canonical_TIS,non_canonical_TIS(AGG)_to_canonical_TIS(ATG),elongated_CDS,702[/658](aa),2109,127854355,127854487,127815684,127815682,AGGCTGGAGCATGGACGCCGTCG,0.864788729688157,c.-132,c.1975,strong,TAG,NM_001114753.3	NA	NA	NA	NA	NA	NA	NA	NA	ATG	canonical_TIS	non_canonical_TIS(AGG)_to_canonical_TIS(ATG)	TAG	127854355	127815682	127854487	127815684	AGGCTGGAGCATGGACGCCGTCG	0.864788729688157	strong	c.-132	c.1975	.	.	.	.	.
chr9	127854486	C	G	ENST00000373203.9:reverse	NM_001114753.3	ENG	.	c.-131G>C	UTR5	uTIS	in_frame	elongated_CDS	1.06686930091185	702/658	2109	ENST00000373203.9:reverse,c.-131G>C,132,in_frame,ACG,UTR5,non_canonical_TIS,non_canonical_TIS(AGG)_to_non_canonical_TIS(ACG),elongated_CDS,702[/658](aa),2109,127854355,127854487,127815684,127815682,AGGCTGGAGCACGGACGCCGTCG,0.864788729688157,c.-132,c.1975,strong,TAG,NM_001114753.3	NA	NA	NA	NA	NA	NA	NA	NA	ACG	non_canonical_TIS	non_canonical_TIS(AGG)_to_non_canonical_TIS(ACG)	TAG	127854355	127815682	127854487	127815684	AGGCTGGAGCACGGACGCCGTCG	0.864788729688157	strong	c.-132	c.1975	.	.	.	.	.
chr9	127854486	C	T	ENST00000373203.9:reverse; ENST00000373203.9:reverse	NM_001114753.3; NM_001114753.3	ENG	.	c.-131G>A; c.-131G>A	UTR5	uTIS	in_frame; out_of_frame_(2)	elongated_CDS; overlapping_6.28%	1.06686930091185	702/658; 85/658	2109; 258	ENST00000373203.9:reverse,c.-131G>A,132,in_frame,AAG,UTR5,non_canonical_TIS,non_canonical_TIS(AGG)_to_non_canonical_TIS(AAG),elongated_CDS,702[/658](aa),2109,127854355,127854487,127815684,127815682,AGGCTGGAGCAAGGACGCCGTCG,0.864788729688157,c.-132,c.1975,strong,TAG,NM_001114753.3|ENST00000373203.9:reverse,c.-131G>A,131,out_of_frame_(2),AGG,UTR5,non_canonical_TIS,non_TIS(GGG)_to_non_canonical_TIS(A…	NA	NA	NA	NA	NA	NA	NA	NA	AAG; AGG	non_canonical_TIS; non_canonical_TIS	non_canonical_TIS(AGG)_to_non_canonical_TIS(AAG); non_TIS(GGG)_to_non_canonical_TIS(AGG)	TAG; TGA	127854355; 127854355	127815682; 127815682	127854487; 127854486	127815684; 127843188	AGGCTGGAGCAAGGACGCCGTCG; GGCTGGAGCAAGGACGCCGTCGC	0.864788729688157; 0.715492957460028	strong; moderate	c.-132; c.-131	c.1975; c.125	.	.	.	.	.
chr9	127854485	C	A	ENST00000373203.9:reverse	NM_001114753.3	ENG	.	c.-130G>T	UTR5	uTIS	out_of_frame_(2)	overlapping_6.28%	0.129179331306991	85/658	258	ENST00000373203.9:reverse,c.-130G>T,131,out_of_frame_(2),GTG,UTR5,non_canonical_TIS,non_TIS(GGG)_to_non_canonical_TIS(GTG),overlapping_6.28%,85[/658](aa),258,127854355,127854486,127843188,127815682,GGCTGGAGCAGTGACGCCGTCGC,0.715492957460028,c.-131,c.125,moderate,TGA,NM_001114753.3	NA	NA	NA	NA	NA	NA	NA	NA	GTG	non_canonical_TIS	non_TIS(GGG)_to_non_canonical_TIS(GTG)	TGA	127854355	127815682	127854486	127843188	GGCTGGAGCAGTGACGCCGTCGC	0.715492957460028	moderate	c.-131	c.125	.	.	.	.	.
chr9	127854482	G	A	ENST00000373203.9:reverse	NM_001114753.3	ENG	rs1060501408	c.-127C>T	UTR5	uTIS	out_of_frame_(2)	overlapping_6.28%	0.127659574468085	84/658	255	ENST00000373203.9:reverse,c.-127C>T,128,out_of_frame_(2),ATG,UTR5,canonical_TIS,non_canonical_TIS(ACG)_to_canonical_TIS(ATG),overlapping_6.28%,84[/658](aa),255,127854355,127854483,127843188,127815682,TGGAGCAGGGATGCCGTCGCTCC,0.690140842771276,c.-128,c.125,moderate,TGA,NM_001114753.3	NA	NA	NA	NA	NA	NA	NA	NA	ATG	canonical_TIS	non_canonical_TIS(ACG)_to_canonical_TIS(ATG)	TGA	127854355	127815682	127854483	127843188	TGGAGCAGGGATGCCGTCGCTCC	0.690140842771276	moderate	c.-128	c.125	.	.	Telangiectasia,_hereditary_hemorrhagic,_type_1|Hereditary_hemorrhagic_telangiectasia|Cardiovascular_phenotype|not_provided	MONDO:MONDO:0008535,MedGen:C4551861,OMIM:187300|MONDO:MONDO:0019180,MedGen:C0039445,OMIM:PS187300,Orphanet:ORPHA774,SNOMED_CT:21877004|MedGen:CN230736|MedGen:CN517202	Pathogenic/Likely_pathogenic
chr9	127854482	G	C	ENST00000373203.9:reverse	NM_001114753.3	ENG	.	c.-127C>G	UTR5	uTIS	out_of_frame_(2)	overlapping_6.28%	0.127659574468085	84/658	255	ENST00000373203.9:reverse,c.-127C>G,128,out_of_frame_(2),AGG,UTR5,non_canonical_TIS,non_canonical_TIS(ACG)_to_non_canonical_TIS(AGG),overlapping_6.28%,84[/658](aa),255,127854355,127854483,127843188,127815682,TGGAGCAGGGAGGCCGTCGCTCC,0.690140842771276,c.-128,c.125,moderate,TGA,NM_001114753.3	NA	NA	NA	NA	NA	NA	NA	NA	AGG	non_canonical_TIS	non_canonical_TIS(ACG)_to_non_canonical_TIS(AGG)	TGA	127854355	127815682	127854483	127843188	TGGAGCAGGGAGGCCGTCGCTCC	0.690140842771276	moderate	c.-128	c.125	.	.	.	.	.
chr9	127854482	G	T	ENST00000373203.9:reverse	NM_001114753.3	ENG	.	c.-127C>A	UTR5	uTIS	out_of_frame_(2)	overlapping_6.28%	0.127659574468085	84/658	255	ENST00000373203.9:reverse,c.-127C>A,128,out_of_frame_(2),AAG,UTR5,non_canonical_TIS,non_canonical_TIS(ACG)_to_non_canonical_TIS(AAG),overlapping_6.28%,84[/658](aa),255,127854355,127854483,127843188,127815682,TGGAGCAGGGAAGCCGTCGCTCC,0.690140842771276,c.-128,c.125,moderate,TGA,NM_001114753.3	NA	NA	NA	NA	NA	NA	NA	NA	AAG	non_canonical_TIS	non_canonical_TIS(ACG)_to_non_canonical_TIS(AAG)	TGA	127854355	127815682	127854483	127843188	TGGAGCAGGGAAGCCGTCGCTCC	0.690140842771276	moderate	c.-128	c.125	.	.	.	.	.
chr9	127854480	G	T	ENST00000373203.9:reverse	NM_001114753.3	ENG	.	c.-125C>A	UTR5	uTIS	out_of_frame_(2)	overlapping_6.28%	0.126139817629179	83/658	252	ENST00000373203.9:reverse,c.-125C>A,125,out_of_frame_(2),ACG,UTR5,non_canonical_TIS,non_TIS(CCG)_to_non_canonical_TIS(ACG),overlapping_6.28%,83[/658](aa),252,127854355,127854480,127843188,127815682,AGCAGGGACGACGTCGCTCCGGC,0.765727694163328,c.-125,c.125,moderate,TGA,NM_001114753.3	NA	NA	NA	NA	NA	NA	NA	NA	ACG	non_canonical_TIS	non_TIS(CCG)_to_non_canonical_TIS(ACG)	TGA	127854355	127815682	127854480	127843188	AGCAGGGACGACGTCGCTCCGGC	0.765727694163328	moderate	c.-125	c.125	.	.	.	.	.
chr9	127854479	G	A	ENST00000373203.9:reverse	NM_001114753.3	ENG	.	c.-124C>T	UTR5	uTIS	out_of_frame_(2)	overlapping_6.28%	0.126139817629179	83/658	252	ENST00000373203.9:reverse,c.-124C>T,125,out_of_frame_(2),CTG,UTR5,non_canonical_TIS,non_TIS(CCG)_to_non_canonical_TIS(CTG),overlapping_6.28%,83[/658](aa),252,127854355,127854480,127843188,127815682,AGCAGGGACGCTGTCGCTCCGGC,0.765727694163328,c.-125,c.125,moderate,TGA,NM_001114753.3	NA	NA	NA	NA	NA	NA	NA	NA	CTG	non_canonical_TIS	non_TIS(CCG)_to_non_canonical_TIS(CTG)	TGA	127854355	127815682	127854480	127843188	AGCAGGGACGCTGTCGCTCCGGC	0.765727694163328	moderate	c.-125	c.125	6.571e-06	.	.	.	.
chr9	127854478	C	T	ENST00000373203.9:reverse	NM_001114753.3	ENG	rs548024640	c.-123G>A	UTR5	uTIS	in_frame	elongated_CDS	1.06231003039514	699/658	2100	ENST00000373203.9:reverse,c.-123G>A,123,in_frame,ATC,UTR5,non_canonical_TIS,non_TIS(GTC)_to_non_canonical_TIS(ATC),elongated_CDS,699[/658](aa),2100,127854355,127854478,127815684,127815682,CAGGGACGCCATCGCTCCGGCCG,0.884507036652649,c.-123,c.1975,moderate,TAG,NM_001114753.3	NA	NA	NA	NA	NA	NA	NA	NA	ATC	non_canonical_TIS	non_TIS(GTC)_to_non_canonical_TIS(ATC)	TAG	127854355	127815682	127854478	127815684	CAGGGACGCCATCGCTCCGGCCG	0.884507036652649	strong	c.-123	c.1975	0.0001	0.0003	.	.	.
chr9	127854477	A	T	ENST00000373203.9:reverse	NM_001114753.3	ENG	.	c.-122T>A	UTR5	uTIS	out_of_frame_(2)	overlapping_6.28%	0.124620060790274	82/658	249	ENST00000373203.9:reverse,c.-122T>A,122,out_of_frame_(2),ACG,UTR5,non_canonical_TIS,non_TIS(TCG)_to_non_canonical_TIS(ACG),overlapping_6.28%,82[/658](aa),249,127854355,127854477,127843188,127815682,AGGGACGCCGACGCTCCGGCCGC,0.507042250958143,c.-122,c.125,weak,TGA,NM_001114753.3	NA	NA	NA	NA	NA	NA	NA	NA	ACG	non_canonical_TIS	non_TIS(TCG)_to_non_canonical_TIS(ACG)	TGA	127854355	127815682	127854477	127843188	AGGGACGCCGACGCTCCGGCCGC	0.507042250958143	weak	c.-122	c.125	.	.	.	.	.
chr9	127854476	G	A	ENST00000373203.9:reverse	NM_001114753.3	ENG	rs527858227	c.-121C>T	UTR5	uTIS	out_of_frame_(2)	overlapping_6.28%	0.124620060790274	82/658	249	ENST00000373203.9:reverse,c.-121C>T,122,out_of_frame_(2),TTG,UTR5,non_canonical_TIS,non_TIS(TCG)_to_non_canonical_TIS(TTG),overlapping_6.28%,82[/658](aa),249,127854355,127854477,127843188,127815682,AGGGACGCCGTTGCTCCGGCCGC,0.507042250958143,c.-122,c.125,weak,TGA,NM_001114753.3	NA	NA	NA	NA	NA	NA	NA	NA	TTG	non_canonical_TIS	non_TIS(TCG)_to_non_canonical_TIS(TTG)	TGA	127854355	127815682	127854477	127843188	AGGGACGCCGTTGCTCCGGCCGC	0.507042250958143	weak	c.-122	c.125	.	.	.	.	.
chr9	127854476	G	C	ENST00000373203.9:reverse	NM_001114753.3	ENG	.	c.-121C>G	UTR5	uTIS	in_frame	elongated_CDS	1.06231003039514	699/658	2100	ENST00000373203.9:reverse,c.-121C>G,123,in_frame,GTG,UTR5,non_canonical_TIS,non_TIS(GTC)_to_non_canonical_TIS(GTG),elongated_CDS,699[/658](aa),2100,127854355,127854478,127815684,127815682,CAGGGACGCCGTGGCTCCGGCCG,0.884507036652649,c.-123,c.1975,moderate,TAG,NM_001114753.3	NA	NA	NA	NA	NA	NA	NA	NA	GTG	non_canonical_TIS	non_TIS(GTC)_to_non_canonical_TIS(GTG)	TAG	127854355	127815682	127854478	127815684	CAGGGACGCCGTGGCTCCGGCCG	0.884507036652649	strong	c.-123	c.1975	.	.	.	.	.
chr9	127854474	G	T	ENST00000373203.9:reverse	NM_001114753.3	ENG	.	c.-119C>A	UTR5	uTIS	out_of_frame_(2)	overlapping_6.28%	0.123100303951368	81/658	246	ENST00000373203.9:reverse,c.-119C>A,119,out_of_frame_(2),ATC,UTR5,non_canonical_TIS,non_TIS(CTC)_to_non_canonical_TIS(ATC),overlapping_6.28%,81[/658](aa),246,127854355,127854474,127843188,127815682,GACGCCGTCGATCCGGCCGCCTG,0.515492953178338,c.-119,c.125,weak,TGA,NM_001114753.3	NA	NA	NA	NA	NA	NA	NA	NA	ATC	non_canonical_TIS	non_TIS(CTC)_to_non_canonical_TIS(ATC)	TGA	127854355	127815682	127854474	127843188	GACGCCGTCGATCCGGCCGCCTG	0.515492953178338	weak	c.-119	c.125	.	.	.	.	.
chr9	127854472	G	C	ENST00000373203.9:reverse	NM_001114753.3	ENG	.	c.-117C>G	UTR5	uTIS	out_of_frame_(2)	overlapping_6.28%	0.123100303951368	81/658	246	ENST00000373203.9:reverse,c.-117C>G,119,out_of_frame_(2),CTG,UTR5,non_canonical_TIS,non_TIS(CTC)_to_non_canonical_TIS(CTG),overlapping_6.28%,81[/658](aa),246,127854355,127854474,127843188,127815682,GACGCCGTCGCTGCGGCCGCCTG,0.515492953178338,c.-119,c.125,weak,TGA,NM_001114753.3	NA	NA	NA	NA	NA	NA	NA	NA	CTG	non_canonical_TIS	non_TIS(CTC)_to_non_canonical_TIS(CTG)	TGA	127854355	127815682	127854474	127843188	GACGCCGTCGCTGCGGCCGCCTG	0.515492953178338	weak	c.-119	c.125	.	.	.	.	.
chr9	127854472	G	T	ENST00000373203.9:reverse	NM_001114753.3	ENG	.	c.-117C>A	UTR5	uTIS	in_frame	elongated_CDS	1.05927051671733	697/658	2094	ENST00000373203.9:reverse,c.-117C>A,117,in_frame,ACG,UTR5,non_canonical_TIS,non_TIS(CCG)_to_non_canonical_TIS(ACG),elongated_CDS,697[/658](aa),2094,127854355,127854472,127815684,127815682,CGCCGTCGCTACGGCCGCCTGCT,0.791549293498116,c.-117,c.1975,strong,TAG,NM_001114753.3	NA	NA	NA	NA	NA	NA	NA	NA	ACG	non_canonical_TIS	non_TIS(CCG)_to_non_canonical_TIS(ACG)	TAG	127854355	127815682	127854472	127815684	CGCCGTCGCTACGGCCGCCTGCT	0.791549293498116	strong	c.-117	c.1975	.	.	.	.	.
chr9	127854471	G	A	ENST00000373203.9:reverse	NM_001114753.3	ENG	.	c.-116C>T	UTR5	uTIS	in_frame	elongated_CDS	1.05927051671733	697/658	2094	ENST00000373203.9:reverse,c.-116C>T,117,in_frame,CTG,UTR5,non_canonical_TIS,non_TIS(CCG)_to_non_canonical_TIS(CTG),elongated_CDS,697[/658](aa),2094,127854355,127854472,127815684,127815682,CGCCGTCGCTCTGGCCGCCTGCT,0.791549293498116,c.-117,c.1975,strong,TAG,NM_001114753.3	NA	NA	NA	NA	NA	NA	NA	NA	CTG	non_canonical_TIS	non_TIS(CCG)_to_non_canonical_TIS(CTG)	TAG	127854355	127815682	127854472	127815684	CGCCGTCGCTCTGGCCGCCTGCT	0.791549293498116	strong	c.-117	c.1975	.	.	.	.	.
chr9	127854471	G	T	ENST00000373203.9:reverse	NM_001114753.3	ENG	.	c.-116C>A	UTR5	uTIS	out_of_frame_(2)	overlapping_6.28%	0.121580547112462	80/658	243	ENST00000373203.9:reverse,c.-116C>A,116,out_of_frame_(2),AGG,UTR5,non_canonical_TIS,non_TIS(CGG)_to_non_canonical_TIS(AGG),overlapping_6.28%,80[/658](aa),243,127854355,127854471,127843188,127815682,GCCGTCGCTCAGGCCGCCTGCTC,0.55757041723775,c.-116,c.125,weak,TGA,NM_001114753.3	NA	NA	NA	NA	NA	NA	NA	NA	AGG	non_canonical_TIS	non_TIS(CGG)_to_non_canonical_TIS(AGG)	TGA	127854355	127815682	127854471	127843188	GCCGTCGCTCAGGCCGCCTGCTC	0.55757041723775	weak	c.-116	c.125	.	.	.	.	.
chr9	127854470	C	A	ENST00000373203.9:reverse	NM_001114753.3	ENG	.	c.-115G>T	UTR5	uTIS	out_of_frame_(2)	overlapping_6.28%	0.121580547112462	80/658	243	ENST00000373203.9:reverse,c.-115G>T,116,out_of_frame_(2),CTG,UTR5,non_canonical_TIS,non_TIS(CGG)_to_non_canonical_TIS(CTG),overlapping_6.28%,80[/658](aa),243,127854355,127854471,127843188,127815682,GCCGTCGCTCCTGCCGCCTGCTC,0.55757041723775,c.-116,c.125,weak,TGA,NM_001114753.3	NA	NA	NA	NA	NA	NA	NA	NA	CTG	non_canonical_TIS	non_TIS(CGG)_to_non_canonical_TIS(CTG)	TGA	127854355	127815682	127854471	127843188	GCCGTCGCTCCTGCCGCCTGCTC	0.55757041723775	weak	c.-116	c.125	.	.	.	.	.
chr9	127854468	G	T	ENST00000373203.9:reverse	NM_001114753.3	ENG	.	c.-113C>A	UTR5	uTIS	out_of_frame_(2)	overlapping_6.28%	0.120060790273556	79/658	240	ENST00000373203.9:reverse,c.-113C>A,113,out_of_frame_(2),ACG,UTR5,non_canonical_TIS,non_TIS(CCG)_to_non_canonical_TIS(ACG),overlapping_6.28%,79[/658](aa),240,127854355,127854468,127843188,127815682,GTCGCTCCGGACGCCTGCTCCCC,0.538028168019044,c.-113,c.125,moderate,TGA,NM_001114753.3	NA	NA	NA	NA	NA	NA	NA	NA	ACG	non_canonical_TIS	non_TIS(CCG)_to_non_canonical_TIS(ACG)	TGA	127854355	127815682	127854468	127843188	GTCGCTCCGGACGCCTGCTCCCC	0.538028168019044	weak	c.-113	c.125	.	.	.	.	.
chr9	127854467	G	A	ENST00000373203.9:reverse	NM_001114753.3	ENG	.	c.-112C>T	UTR5	uTIS	out_of_frame_(2)	overlapping_6.28%	0.120060790273556	79/658	240	ENST00000373203.9:reverse,c.-112C>T,113,out_of_frame_(2),CTG,UTR5,non_canonical_TIS,non_TIS(CCG)_to_non_canonical_TIS(CTG),overlapping_6.28%,79[/658](aa),240,127854355,127854468,127843188,127815682,GTCGCTCCGGCTGCCTGCTCCCC,0.538028168019044,c.-113,c.125,moderate,TGA,NM_001114753.3	NA	NA	NA	NA	NA	NA	NA	NA	CTG	non_canonical_TIS	non_TIS(CCG)_to_non_canonical_TIS(CTG)	TGA	127854355	127815682	127854468	127843188	GTCGCTCCGGCTGCCTGCTCCCC	0.538028168019044	weak	c.-113	c.125	1.314e-05	2.412e-05	.	.	.
chr9	127854464	G	A	ENST00000373203.9:reverse	NM_001114753.3	ENG	.	c.-109C>T	UTR5	uTIS	out_of_frame_(1)	not_overlapping	0.0379939209726444	25/658	78	ENST00000373203.9:reverse,c.-109C>T,109,out_of_frame_(1),TTG,UTR5,non_canonical_TIS,non_canonical_TIS(CTG)_to_non_canonical_TIS(TTG),not_overlapping,25[/658](aa),78,127854355,127854464,127854389,127815682,CTCCGGCCGCTTGCTCCCCTCGG,0.59718309426463,c.-109,c.-34,weak,TAA,NM_001114753.3	NA	NA	NA	NA	NA	NA	NA	NA	TTG	non_canonical_TIS	non_canonical_TIS(CTG)_to_non_canonical_TIS(TTG)	TAA	127854355	127815682	127854464	127854389	CTCCGGCCGCTTGCTCCCCTCGG	0.59718309426463	weak	c.-109	c.-34	.	.	.	.	.
chr9	127854464	G	C	ENST00000373203.9:reverse	NM_001114753.3	ENG	.	c.-109C>G	UTR5	uTIS	out_of_frame_(1)	not_overlapping	0.0379939209726444	25/658	78	ENST00000373203.9:reverse,c.-109C>G,109,out_of_frame_(1),GTG,UTR5,non_canonical_TIS,non_canonical_TIS(CTG)_to_non_canonical_TIS(GTG),not_overlapping,25[/658](aa),78,127854355,127854464,127854389,127815682,CTCCGGCCGCGTGCTCCCCTCGG,0.59718309426463,c.-109,c.-34,weak,TAA,NM_001114753.3	NA	NA	NA	NA	NA	NA	NA	NA	GTG	non_canonical_TIS	non_canonical_TIS(CTG)_to_non_canonical_TIS(GTG)	TAA	127854355	127815682	127854464	127854389	CTCCGGCCGCGTGCTCCCCTCGG	0.59718309426463	weak	c.-109	c.-34	.	.	.	.	.
chr9	127854464	G	T	ENST00000373203.9:reverse	NM_001114753.3	ENG	.	c.-109C>A	UTR5	uTIS	out_of_frame_(1)	not_overlapping	0.0379939209726444	25/658	78	ENST00000373203.9:reverse,c.-109C>A,109,out_of_frame_(1),ATG,UTR5,canonical_TIS,non_canonical_TIS(CTG)_to_canonical_TIS(ATG),not_overlapping,25[/658](aa),78,127854355,127854464,127854389,127815682,CTCCGGCCGCATGCTCCCCTCGG,0.59718309426463,c.-109,c.-34,weak,TAA,NM_001114753.3	NA	NA	NA	NA	NA	NA	NA	NA	ATG	canonical_TIS	non_canonical_TIS(CTG)_to_canonical_TIS(ATG)	TAA	127854355	127815682	127854464	127854389	CTCCGGCCGCATGCTCCCCTCGG	0.59718309426463	weak	c.-109	c.-34	.	.	.	.	.
chr9	127854461	G	T	ENST00000373203.9:reverse	NM_001114753.3	ENG	.	c.-106C>A	UTR5	uTIS	out_of_frame_(1)	not_overlapping	0.0364741641337386	24/658	75	ENST00000373203.9:reverse,c.-106C>A,106,out_of_frame_(1),ATC,UTR5,non_canonical_TIS,non_TIS(CTC)_to_non_canonical_TIS(ATC),not_overlapping,24[/658](aa),75,127854355,127854461,127854389,127815682,CGGCCGCCTGATCCCCTCGGGTC,0.538028168019044,c.-106,c.-34,weak,TAA,NM_001114753.3	NA	NA	NA	NA	NA	NA	NA	NA	ATC	non_canonical_TIS	non_TIS(CTC)_to_non_canonical_TIS(ATC)	TAA	127854355	127815682	127854461	127854389	CGGCCGCCTGATCCCCTCGGGTC	0.538028168019044	weak	c.-106	c.-34	.	.	.	.	.
chr9	127854459	G	C	ENST00000373203.9:reverse	NM_001114753.3	ENG	.	c.-104C>G	UTR5	uTIS	out_of_frame_(1)	not_overlapping	0.0364741641337386	24/658	75	ENST00000373203.9:reverse,c.-104C>G,106,out_of_frame_(1),CTG,UTR5,non_canonical_TIS,non_TIS(CTC)_to_non_canonical_TIS(CTG),not_overlapping,24[/658](aa),75,127854355,127854461,127854389,127815682,CGGCCGCCTGCTGCCCTCGGGTC,0.538028168019044,c.-106,c.-34,weak,TAA,NM_001114753.3	NA	NA	NA	NA	NA	NA	NA	NA	CTG	non_canonical_TIS	non_TIS(CTC)_to_non_canonical_TIS(CTG)	TAA	127854355	127815682	127854461	127854389	CGGCCGCCTGCTGCCCTCGGGTC	0.538028168019044	weak	c.-106	c.-34	.	.	.	.	.
chr9	127854456	G	T	ENST00000373203.9:reverse	NM_001114753.3	ENG	.	c.-101C>A	UTR5	uTIS	out_of_frame_(2)	overlapping_6.28%	0.113981762917933	75/658	228	ENST00000373203.9:reverse,c.-101C>A,101,out_of_frame_(2),ATC,UTR5,non_canonical_TIS,non_TIS(CTC)_to_non_canonical_TIS(ATC),overlapping_6.28%,75[/658](aa),228,127854355,127854456,127843188,127815682,GCCTGCTCCCATCGGGTCCCCGT,0.681338025059512,c.-101,c.125,weak,TGA,NM_001114753.3	NA	NA	NA	NA	NA	NA	NA	NA	ATC	non_canonical_TIS	non_TIS(CTC)_to_non_canonical_TIS(ATC)	TGA	127854355	127815682	127854456	127843188	GCCTGCTCCCATCGGGTCCCCGT	0.681338025059512	moderate	c.-101	c.125	.	.	.	.	.
chr9	127854455	A	T	ENST00000373203.9:reverse	NM_001114753.3	ENG	.	c.-100T>A	UTR5	uTIS	out_of_frame_(1)	not_overlapping	0.033434650455927	22/658	69	ENST00000373203.9:reverse,c.-100T>A,100,out_of_frame_(1),ACG,UTR5,non_canonical_TIS,non_TIS(TCG)_to_non_canonical_TIS(ACG),not_overlapping,22[/658](aa),69,127854355,127854455,127854389,127815682,CCTGCTCCCCACGGGTCCCCGTG,0.684330979977287,c.-100,c.-34,weak,TAA,NM_001114753.3	NA	NA	NA	NA	NA	NA	NA	NA	ACG	non_canonical_TIS	non_TIS(TCG)_to_non_canonical_TIS(ACG)	TAA	127854355	127815682	127854455	127854389	CCTGCTCCCCACGGGTCCCCGTG	0.684330979977287	moderate	c.-100	c.-34	.	.	.	.	.
chr9	127854454	G	A	ENST00000373203.9:reverse	NM_001114753.3	ENG	.	c.-99C>T	UTR5	uTIS	out_of_frame_(1)	not_overlapping	0.033434650455927	22/658	69	ENST00000373203.9:reverse,c.-99C>T,100,out_of_frame_(1),TTG,UTR5,non_canonical_TIS,non_TIS(TCG)_to_non_canonical_TIS(TTG),not_overlapping,22[/658](aa),69,127854355,127854455,127854389,127815682,CCTGCTCCCCTTGGGTCCCCGTG,0.684330979977287,c.-100,c.-34,weak,TAA,NM_001114753.3	NA	NA	NA	NA	NA	NA	NA	NA	TTG	non_canonical_TIS	non_TIS(TCG)_to_non_canonical_TIS(TTG)	TAA	127854355	127815682	127854455	127854389	CCTGCTCCCCTTGGGTCCCCGTG	0.684330979977287	moderate	c.-100	c.-34	1.314e-05	4.825e-05	Hereditary_hemorrhagic_telangiectasia	MONDO:MONDO:0019180,MedGen:C0039445,OMIM:PS187300,Orphanet:ORPHA774,SNOMED_CT:21877004	Uncertain_significance
chr9	127854454	G	C	ENST00000373203.9:reverse	NM_001114753.3	ENG	.	c.-99C>G	UTR5	uTIS	out_of_frame_(2)	overlapping_6.28%	0.113981762917933	75/658	228	ENST00000373203.9:reverse,c.-99C>G,101,out_of_frame_(2),CTG,UTR5,non_canonical_TIS,non_TIS(CTC)_to_non_canonical_TIS(CTG),overlapping_6.28%,75[/658](aa),228,127854355,127854456,127843188,127815682,GCCTGCTCCCCTGGGGTCCCCGT,0.681338025059512,c.-101,c.125,weak,TGA,NM_001114753.3	NA	NA	NA	NA	NA	NA	NA	NA	CTG	non_canonical_TIS	non_TIS(CTC)_to_non_canonical_TIS(CTG)	TGA	127854355	127815682	127854456	127843188	GCCTGCTCCCCTGGGGTCCCCGT	0.681338025059512	moderate	c.-101	c.125	.	.	.	.	.
chr9	127854454	G	T	ENST00000373203.9:reverse	NM_001114753.3	ENG	.	c.-99C>A	UTR5	uTIS	in_frame	elongated_CDS	1.05015197568389	691/658	2076	ENST00000373203.9:reverse,c.-99C>A,99,in_frame,AGG,UTR5,non_canonical_TIS,non_TIS(CGG)_to_non_canonical_TIS(AGG),elongated_CDS,691[/658](aa),2076,127854355,127854454,127815684,127815682,CTGCTCCCCTAGGGTCCCCGTGC,0.580281689824241,c.-99,c.1975,weak,TAG,NM_001114753.3	NA	NA	NA	NA	NA	NA	NA	NA	AGG	non_canonical_TIS	non_TIS(CGG)_to_non_canonical_TIS(AGG)	TAG	127854355	127815682	127854454	127815684	CTGCTCCCCTAGGGTCCCCGTGC	0.580281689824241	moderate	c.-99	c.1975	.	.	.	.	.
chr9	127854453	C	A	ENST00000373203.9:reverse	NM_001114753.3	ENG	.	c.-98G>T	UTR5	uTIS	in_frame	elongated_CDS	1.05015197568389	691/658	2076	ENST00000373203.9:reverse,c.-98G>T,99,in_frame,CTG,UTR5,non_canonical_TIS,non_TIS(CGG)_to_non_canonical_TIS(CTG),elongated_CDS,691[/658](aa),2076,127854355,127854454,127815684,127815682,CTGCTCCCCTCTGGTCCCCGTGC,0.580281689824241,c.-99,c.1975,weak,TAG,NM_001114753.3	NA	NA	NA	NA	NA	NA	NA	NA	CTG	non_canonical_TIS	non_TIS(CGG)_to_non_canonical_TIS(CTG)	TAG	127854355	127815682	127854454	127815684	CTGCTCCCCTCTGGTCCCCGTGC	0.580281689824241	moderate	c.-99	c.1975	.	.	.	.	.
chr9	127854453	C	T	ENST00000373203.9:reverse	NM_001114753.3	ENG	rs923040659	c.-98G>A	UTR5	uTIS	out_of_frame_(2)	overlapping_6.28%	0.112462006079027	74/658	225	ENST00000373203.9:reverse,c.-98G>A,98,out_of_frame_(2),AGG,UTR5,non_canonical_TIS,non_TIS(GGG)_to_non_canonical_TIS(AGG),overlapping_6.28%,74[/658](aa),225,127854355,127854453,127843188,127815682,TGCTCCCCTCAGGTCCCCGTGCG,0.605164317190902,c.-98,c.125,weak,TGA,NM_001114753.3	NA	NA	NA	NA	NA	NA	NA	NA	AGG	non_canonical_TIS	non_TIS(GGG)_to_non_canonical_TIS(AGG)	TGA	127854355	127815682	127854453	127843188	TGCTCCCCTCAGGTCCCCGTGCG	0.605164317190902	weak	c.-98	c.125	2.629e-05	5.881e-05	Telangiectasia,_hereditary_hemorrhagic,_type_1	MONDO:MONDO:0008535,MedGen:C4551861,OMIM:187300	Likely_benign
chr9	127854452	C	A	ENST00000373203.9:reverse	NM_001114753.3	ENG	.	c.-97G>T	UTR5	uTIS	out_of_frame_(2)	overlapping_6.28%	0.112462006079027	74/658	225	ENST00000373203.9:reverse,c.-97G>T,98,out_of_frame_(2),GTG,UTR5,non_canonical_TIS,non_TIS(GGG)_to_non_canonical_TIS(GTG),overlapping_6.28%,74[/658](aa),225,127854355,127854453,127843188,127815682,TGCTCCCCTCGTGTCCCCGTGCG,0.605164317190902,c.-98,c.125,weak,TGA,NM_001114753.3	NA	NA	NA	NA	NA	NA	NA	NA	GTG	non_canonical_TIS	non_TIS(GGG)_to_non_canonical_TIS(GTG)	TGA	127854355	127815682	127854453	127843188	TGCTCCCCTCGTGTCCCCGTGCG	0.605164317190902	weak	c.-98	c.125	.	.	.	.	.
chr9	127854451	C	T	ENST00000373203.9:reverse	NM_001114753.3	ENG	.	c.-96G>A	UTR5	uTIS	in_frame	elongated_CDS	1.04863221884498	690/658	2073	ENST00000373203.9:reverse,c.-96G>A,96,in_frame,ATC,UTR5,non_canonical_TIS,non_TIS(GTC)_to_non_canonical_TIS(ATC),elongated_CDS,690[/658](aa),2073,127854355,127854451,127815684,127815682,CTCCCCTCGGATCCCCGTGCGAG,0.520950700480758,c.-96,c.1975,moderate,TAG,NM_001114753.3	NA	NA	NA	NA	NA	NA	NA	NA	ATC	non_canonical_TIS	non_TIS(GTC)_to_non_canonical_TIS(ATC)	TAG	127854355	127815682	127854451	127815684	CTCCCCTCGGATCCCCGTGCGAG	0.520950700480758	weak	c.-96	c.1975	.	.	.	.	.
chr9	127854449	G	C	ENST00000373203.9:reverse	NM_001114753.3	ENG	.	c.-94C>G	UTR5	uTIS	in_frame	elongated_CDS	1.04863221884498	690/658	2073	ENST00000373203.9:reverse,c.-94C>G,96,in_frame,GTG,UTR5,non_canonical_TIS,non_TIS(GTC)_to_non_canonical_TIS(GTG),elongated_CDS,690[/658](aa),2073,127854355,127854451,127815684,127815682,CTCCCCTCGGGTGCCCGTGCGAG,0.520950700480758,c.-96,c.1975,moderate,TAG,NM_001114753.3	NA	NA	NA	NA	NA	NA	NA	NA	GTG	non_canonical_TIS	non_TIS(GTC)_to_non_canonical_TIS(GTG)	TAG	127854355	127815682	127854451	127815684	CTCCCCTCGGGTGCCCGTGCGAG	0.520950700480758	weak	c.-96	c.1975	.	.	.	.	.
chr9	127854447	G	T	ENST00000373203.9:reverse	NM_001114753.3	ENG	.	c.-92C>A	UTR5	uTIS	out_of_frame_(2)	overlapping_6.28%	0.109422492401216	72/658	219	ENST00000373203.9:reverse,c.-92C>A,92,out_of_frame_(2),ACG,UTR5,non_canonical_TIS,non_TIS(CCG)_to_non_canonical_TIS(ACG),overlapping_6.28%,72[/658](aa),219,127854355,127854447,127843188,127815682,CCTCGGGTCCACGTGCGAGCCCA,0.579460089686636,c.-92,c.125,moderate,TGA,NM_001114753.3	NA	NA	NA	NA	NA	NA	NA	NA	ACG	non_canonical_TIS	non_TIS(CCG)_to_non_canonical_TIS(ACG)	TGA	127854355	127815682	127854447	127843188	CCTCGGGTCCACGTGCGAGCCCA	0.579460089686636	weak	c.-92	c.125	.	.	.	.	.
chr9	127854446	G	A	ENST00000373203.9:reverse	NM_001114753.3	ENG	.	c.-91C>T	UTR5	uTIS	out_of_frame_(2)	overlapping_6.28%	0.109422492401216	72/658	219	ENST00000373203.9:reverse,c.-91C>T,92,out_of_frame_(2),CTG,UTR5,non_canonical_TIS,non_TIS(CCG)_to_non_canonical_TIS(CTG),overlapping_6.28%,72[/658](aa),219,127854355,127854447,127843188,127815682,CCTCGGGTCCCTGTGCGAGCCCA,0.579460089686636,c.-92,c.125,moderate,TGA,NM_001114753.3	NA	NA	NA	NA	NA	NA	NA	NA	CTG	non_canonical_TIS	non_TIS(CCG)_to_non_canonical_TIS(CTG)	TGA	127854355	127815682	127854447	127843188	CCTCGGGTCCCTGTGCGAGCCCA	0.579460089686636	weak	c.-92	c.125	1.971e-05	0.0002	Hereditary_hemorrhagic_telangiectasia	MONDO:MONDO:0019180,MedGen:C0039445,OMIM:PS187300,Orphanet:ORPHA774,SNOMED_CT:21877004	Uncertain_significance
chr9	127854445	C	A	ENST00000373203.9:reverse	NM_001114753.3	ENG	.	c.-90G>T	UTR5	uTIS	in_frame	elongated_CDS	1.04559270516717	688/658	2067	ENST00000373203.9:reverse,c.-90G>T,90,in_frame,TTG,UTR5,non_canonical_TIS,non_canonical_TIS(GTG)_to_non_canonical_TIS(TTG),elongated_CDS,688[/658](aa),2067,127854355,127854445,127815684,127815682,TCGGGTCCCCTTGCGAGCCCACG,0.599823939042948,c.-90,c.1975,moderate,TAG,NM_001114753.3	NA	NA	NA	NA	NA	NA	NA	NA	TTG	non_canonical_TIS	non_canonical_TIS(GTG)_to_non_canonical_TIS(TTG)	TAG	127854355	127815682	127854445	127815684	TCGGGTCCCCTTGCGAGCCCACG	0.599823939042948	weak	c.-90	c.1975	.	.	.	.	.
chr9	127854445	C	G	ENST00000373203.9:reverse	NM_001114753.3	ENG	rs768083796	c.-90G>C	UTR5	uTIS	in_frame	elongated_CDS	1.04559270516717	688/658	2067	ENST00000373203.9:reverse,c.-90G>C,90,in_frame,CTG,UTR5,non_canonical_TIS,non_canonical_TIS(GTG)_to_non_canonical_TIS(CTG),elongated_CDS,688[/658](aa),2067,127854355,127854445,127815684,127815682,TCGGGTCCCCCTGCGAGCCCACG,0.599823939042948,c.-90,c.1975,moderate,TAG,NM_001114753.3	NA	NA	NA	NA	NA	NA	NA	NA	CTG	non_canonical_TIS	non_canonical_TIS(GTG)_to_non_canonical_TIS(CTG)	TAG	127854355	127815682	127854445	127815684	TCGGGTCCCCCTGCGAGCCCACG	0.599823939042948	weak	c.-90	c.1975	4.6e-05	0.0001	Telangiectasia,_hereditary_hemorrhagic,_type_1	MONDO:MONDO:0008535,MedGen:C4551861,OMIM:187300	Uncertain_significance
chr9	127854445	C	T	ENST00000373203.9:reverse	NM_001114753.3	ENG	rs768083796	c.-90G>A	UTR5	uTIS	in_frame	elongated_CDS	1.04559270516717	688/658	2067	ENST00000373203.9:reverse,c.-90G>A,90,in_frame,ATG,UTR5,canonical_TIS,non_canonical_TIS(GTG)_to_canonical_TIS(ATG),elongated_CDS,688[/658](aa),2067,127854355,127854445,127815684,127815682,TCGGGTCCCCATGCGAGCCCACG,0.599823939042948,c.-90,c.1975,moderate,TAG,NM_001114753.3	NA	NA	NA	NA	NA	NA	NA	NA	ATG	canonical_TIS	non_canonical_TIS(GTG)_to_canonical_TIS(ATG)	TAG	127854355	127815682	127854445	127815684	TCGGGTCCCCATGCGAGCCCACG	0.599823939042948	weak	c.-90	c.1975	1.971e-05	0.0002	.	.	.
chr9	127854443	C	T	ENST00000373203.9:reverse	NM_001114753.3	ENG	.	c.-88G>A	UTR5	uTIS	out_of_frame_(1)	not_overlapping	0.027355623100304	18/658	57	ENST00000373203.9:reverse,c.-88G>A,88,out_of_frame_(1),ACG,UTR5,non_canonical_TIS,non_TIS(GCG)_to_non_canonical_TIS(ACG),not_overlapping,18[/658](aa),57,127854355,127854443,127854389,127815682,GGGTCCCCGTACGAGCCCACGCC,0.467605631677048,c.-88,c.-34,weak,TAA,NM_001114753.3	NA	NA	NA	NA	NA	NA	NA	NA	ACG	non_canonical_TIS	non_TIS(GCG)_to_non_canonical_TIS(ACG)	TAA	127854355	127815682	127854443	127854389	GGGTCCCCGTACGAGCCCACGCC	0.467605631677048	weak	c.-88	c.-34	.	.	.	.	.
chr9	127854442	G	A	ENST00000373203.9:reverse	NM_001114753.3	ENG	rs964321855	c.-87C>T	UTR5	uTIS	out_of_frame_(1)	not_overlapping	0.027355623100304	18/658	57	ENST00000373203.9:reverse,c.-87C>T,88,out_of_frame_(1),GTG,UTR5,non_canonical_TIS,non_TIS(GCG)_to_non_canonical_TIS(GTG),not_overlapping,18[/658](aa),57,127854355,127854443,127854389,127815682,GGGTCCCCGTGTGAGCCCACGCC,0.467605631677048,c.-88,c.-34,weak,TAA,NM_001114753.3	NA	NA	NA	NA	NA	NA	NA	NA	GTG	non_canonical_TIS	non_TIS(GCG)_to_non_canonical_TIS(GTG)	TAA	127854355	127815682	127854443	127854389	GGGTCCCCGTGTGAGCCCACGCC	0.467605631677048	weak	c.-88	c.-34	6.569e-06	0.0002	.	.	.
chr9	127854441	C	T	ENST00000373203.9:reverse	NM_001114753.3	ENG	.	c.-86G>A	UTR5	uTIS	out_of_frame_(2)	overlapping_6.28%	0.106382978723404	70/658	213	ENST00000373203.9:reverse,c.-86G>A,86,out_of_frame_(2),AAG,UTR5,non_canonical_TIS,non_TIS(GAG)_to_non_canonical_TIS(AAG),overlapping_6.28%,70[/658](aa),213,127854355,127854441,127843188,127815682,GTCCCCGTGCAAGCCCACGCCGG,0.59114273203493,c.-86,c.125,weak,TGA,NM_001114753.3	NA	NA	NA	NA	NA	NA	NA	NA	AAG	non_canonical_TIS	non_TIS(GAG)_to_non_canonical_TIS(AAG)	TGA	127854355	127815682	127854441	127843188	GTCCCCGTGCAAGCCCACGCCGG	0.59114273203493	weak	c.-86	c.125	1.314e-05	4.825e-05	.	.	.
chr9	127854440	T	A	ENST00000373203.9:reverse	NM_001114753.3	ENG	.	c.-85A>T	UTR5	uTIS	out_of_frame_(2)	overlapping_6.28%	0.106382978723404	70/658	213	ENST00000373203.9:reverse,c.-85A>T,86,out_of_frame_(2),GTG,UTR5,non_canonical_TIS,non_TIS(GAG)_to_non_canonical_TIS(GTG),overlapping_6.28%,70[/658](aa),213,127854355,127854441,127843188,127815682,GTCCCCGTGCGTGCCCACGCCGG,0.59114273203493,c.-86,c.125,weak,TGA,NM_001114753.3	NA	NA	NA	NA	NA	NA	NA	NA	GTG	non_canonical_TIS	non_TIS(GAG)_to_non_canonical_TIS(GTG)	TGA	127854355	127815682	127854441	127843188	GTCCCCGTGCGTGCCCACGCCGG	0.59114273203493	weak	c.-86	c.125	.	.	.	.	.
chr9	127854439	C	A	ENST00000373203.9:reverse	NM_001114753.3	ENG	.	c.-84G>T	UTR5	uTIS	out_of_frame_(1)	not_overlapping	0.0258358662613982	17/658	54	ENST00000373203.9:reverse,c.-84G>T,85,out_of_frame_(1),ATC,UTR5,non_canonical_TIS,non_TIS(AGC)_to_non_canonical_TIS(ATC),not_overlapping,17[/658](aa),54,127854355,127854440,127854389,127815682,TCCCCGTGCGATCCCACGCCGGC,0.627816898510018,c.-85,c.-34,moderate,TAA,NM_001114753.3	NA	NA	NA	NA	NA	NA	NA	NA	ATC	non_canonical_TIS	non_TIS(AGC)_to_non_canonical_TIS(ATC)	TAA	127854355	127815682	127854440	127854389	TCCCCGTGCGATCCCACGCCGGC	0.627816898510018	moderate	c.-85	c.-34	.	.	.	.	.
chr9	127854438	G	C	ENST00000373203.9:reverse	NM_001114753.3	ENG	.	c.-83C>G	UTR5	uTIS	out_of_frame_(1)	not_overlapping	0.0258358662613982	17/658	54	ENST00000373203.9:reverse,c.-83C>G,85,out_of_frame_(1),AGG,UTR5,non_canonical_TIS,non_TIS(AGC)_to_non_canonical_TIS(AGG),not_overlapping,17[/658](aa),54,127854355,127854440,127854389,127815682,TCCCCGTGCGAGGCCACGCCGGC,0.627816898510018,c.-85,c.-34,moderate,TAA,NM_001114753.3	NA	NA	NA	NA	NA	NA	NA	NA	AGG	non_canonical_TIS	non_TIS(AGC)_to_non_canonical_TIS(AGG)	TAA	127854355	127815682	127854440	127854389	TCCCCGTGCGAGGCCACGCCGGC	0.627816898510018	moderate	c.-85	c.-34	.	.	.	.	.
chr9	127854434	G	A	ENST00000373203.9:reverse	NM_001114753.3	ENG	.	c.-79C>T	UTR5	uTIS	out_of_frame_(2)	overlapping_6.28%	0.103343465045593	68/658	207	ENST00000373203.9:reverse,c.-79C>T,80,out_of_frame_(2),ATG,UTR5,canonical_TIS,non_canonical_TIS(ACG)_to_canonical_TIS(ATG),overlapping_6.28%,68[/658](aa),207,127854355,127854435,127843188,127815682,GTGCGAGCCCATGCCGGCCCCGG,0.650704220814124,c.-80,c.125,moderate,TGA,NM_001114753.3	NA	NA	NA	NA	NA	NA	NA	NA	ATG	canonical_TIS	non_canonical_TIS(ACG)_to_canonical_TIS(ATG)	TGA	127854355	127815682	127854435	127843188	GTGCGAGCCCATGCCGGCCCCGG	0.650704220814124	weak	c.-80	c.125	.	.	Hereditary_hemorrhagic_telangiectasia|not_provided	MONDO:MONDO:0019180,MedGen:C0039445,OMIM:PS187300,Orphanet:ORPHA774,SNOMED_CT:21877004|MedGen:CN517202	Uncertain_significance
chr9	127854434	G	C	ENST00000373203.9:reverse	NM_001114753.3	ENG	.	c.-79C>G	UTR5	uTIS	out_of_frame_(2)	overlapping_6.28%	0.103343465045593	68/658	207	ENST00000373203.9:reverse,c.-79C>G,80,out_of_frame_(2),AGG,UTR5,non_canonical_TIS,non_canonical_TIS(ACG)_to_non_canonical_TIS(AGG),overlapping_6.28%,68[/658](aa),207,127854355,127854435,127843188,127815682,GTGCGAGCCCAGGCCGGCCCCGG,0.650704220814124,c.-80,c.125,moderate,TGA,NM_001114753.3	NA	NA	NA	NA	NA	NA	NA	NA	AGG	non_canonical_TIS	non_canonical_TIS(ACG)_to_non_canonical_TIS(AGG)	TGA	127854355	127815682	127854435	127843188	GTGCGAGCCCAGGCCGGCCCCGG	0.650704220814124	weak	c.-80	c.125	.	.	.	.	.
chr9	127854434	G	T	ENST00000373203.9:reverse	NM_001114753.3	ENG	.	c.-79C>A	UTR5	uTIS	out_of_frame_(2)	overlapping_6.28%	0.103343465045593	68/658	207	ENST00000373203.9:reverse,c.-79C>A,80,out_of_frame_(2),AAG,UTR5,non_canonical_TIS,non_canonical_TIS(ACG)_to_non_canonical_TIS(AAG),overlapping_6.28%,68[/658](aa),207,127854355,127854435,127843188,127815682,GTGCGAGCCCAAGCCGGCCCCGG,0.650704220814124,c.-80,c.125,moderate,TGA,NM_001114753.3	NA	NA	NA	NA	NA	NA	NA	NA	AAG	non_canonical_TIS	non_canonical_TIS(ACG)_to_non_canonical_TIS(AAG)	TGA	127854355	127815682	127854435	127843188	GTGCGAGCCCAAGCCGGCCCCGG	0.650704220814124	weak	c.-80	c.125	.	.	.	.	.
chr9	127854432	G	T	ENST00000373203.9:reverse	NM_001114753.3	ENG	.	c.-77C>A	UTR5	uTIS	out_of_frame_(2)	overlapping_6.28%	0.101823708206687	67/658	204	ENST00000373203.9:reverse,c.-77C>A,77,out_of_frame_(2),ACG,UTR5,non_canonical_TIS,non_TIS(CCG)_to_non_canonical_TIS(ACG),overlapping_6.28%,67[/658](aa),204,127854355,127854432,127843188,127815682,CGAGCCCACGACGGCCCCGGTGC,0.873239437260464,c.-77,c.125,moderate,TGA,NM_001114753.3	NA	NA	NA	NA	NA	NA	NA	NA	ACG	non_canonical_TIS	non_TIS(CCG)_to_non_canonical_TIS(ACG)	TGA	127854355	127815682	127854432	127843188	CGAGCCCACGACGGCCCCGGTGC	0.873239437260464	strong	c.-77	c.125	6.569e-06	2.412e-05	.	.	.
chr9	127854431	G	A	ENST00000373203.9:reverse	NM_001114753.3	ENG	rs943786398	c.-76C>T	UTR5	uTIS	out_of_frame_(2)	overlapping_6.28%	0.101823708206687	67/658	204	ENST00000373203.9:reverse,c.-76C>T,77,out_of_frame_(2),CTG,UTR5,non_canonical_TIS,non_TIS(CCG)_to_non_canonical_TIS(CTG),overlapping_6.28%,67[/658](aa),204,127854355,127854432,127843188,127815682,CGAGCCCACGCTGGCCCCGGTGC,0.873239437260464,c.-77,c.125,moderate,TGA,NM_001114753.3	NA	NA	NA	NA	NA	NA	NA	NA	CTG	non_canonical_TIS	non_TIS(CCG)_to_non_canonical_TIS(CTG)	TGA	127854355	127815682	127854432	127843188	CGAGCCCACGCTGGCCCCGGTGC	0.873239437260464	strong	c.-77	c.125	6.569e-05	0.0001	Hereditary_hemorrhagic_telangiectasia	MONDO:MONDO:0019180,MedGen:C0039445,OMIM:PS187300,Orphanet:ORPHA774,SNOMED_CT:21877004	Uncertain_significance
chr9	127854431	G	T	ENST00000373203.9:reverse	NM_001114753.3	ENG	.	c.-76C>A	UTR5	uTIS	out_of_frame_(1)	not_overlapping	0.0212765957446809	14/658	45	ENST00000373203.9:reverse,c.-76C>A,76,out_of_frame_(1),AGG,UTR5,non_canonical_TIS,non_TIS(CGG)_to_non_canonical_TIS(AGG),not_overlapping,14[/658](aa),45,127854355,127854431,127854389,127815682,GAGCCCACGCAGGCCCCGGTGCC,0.560563377507638,c.-76,c.-34,weak,TAA,NM_001114753.3	NA	NA	NA	NA	NA	NA	NA	NA	AGG	non_canonical_TIS	non_TIS(CGG)_to_non_canonical_TIS(AGG)	TAA	127854355	127815682	127854431	127854389	GAGCCCACGCAGGCCCCGGTGCC	0.560563377507638	weak	c.-76	c.-34	.	.	.	.	.
chr9	127854430	C	A	ENST00000373203.9:reverse	NM_001114753.3	ENG	.	c.-75G>T	UTR5	uTIS	out_of_frame_(1)	not_overlapping	0.0212765957446809	14/658	45	ENST00000373203.9:reverse,c.-75G>T,76,out_of_frame_(1),CTG,UTR5,non_canonical_TIS,non_TIS(CGG)_to_non_canonical_TIS(CTG),not_overlapping,14[/658](aa),45,127854355,127854431,127854389,127815682,GAGCCCACGCCTGCCCCGGTGCC,0.560563377507638,c.-76,c.-34,weak,TAA,NM_001114753.3	NA	NA	NA	NA	NA	NA	NA	NA	CTG	non_canonical_TIS	non_TIS(CGG)_to_non_canonical_TIS(CTG)	TAA	127854355	127815682	127854431	127854389	GAGCCCACGCCTGCCCCGGTGCC	0.560563377507638	weak	c.-76	c.-34	.	.	.	.	.
chr9	127854426	G	T	ENST00000373203.9:reverse	NM_001114753.3	ENG	.	c.-71C>A	UTR5	uTIS	out_of_frame_(2)	overlapping_6.28%	0.0987841945288754	65/658	198	ENST00000373203.9:reverse,c.-71C>A,71,out_of_frame_(2),ACG,UTR5,non_canonical_TIS,non_TIS(CCG)_to_non_canonical_TIS(ACG),overlapping_6.28%,65[/658](aa),198,127854355,127854426,127843188,127815682,CACGCCGGCCACGGTGCCCGCCC,0.819718305358857,c.-71,c.125,moderate,TGA,NM_001114753.3	NA	NA	NA	NA	NA	NA	NA	NA	ACG	non_canonical_TIS	non_TIS(CCG)_to_non_canonical_TIS(ACG)	TGA	127854355	127815682	127854426	127843188	CACGCCGGCCACGGTGCCCGCCC	0.819718305358857	strong	c.-71	c.125	.	.	.	.	.
chr9	127854425	G	A	ENST00000373203.9:reverse	NM_001114753.3	ENG	rs562538400	c.-70C>T	UTR5	uTIS	out_of_frame_(2)	overlapping_6.28%	0.0987841945288754	65/658	198	ENST00000373203.9:reverse,c.-70C>T,71,out_of_frame_(2),CTG,UTR5,non_canonical_TIS,non_TIS(CCG)_to_non_canonical_TIS(CTG),overlapping_6.28%,65[/658](aa),198,127854355,127854426,127843188,127815682,CACGCCGGCCCTGGTGCCCGCCC,0.819718305358857,c.-71,c.125,moderate,TGA,NM_001114753.3	NA	NA	NA	NA	NA	NA	NA	NA	CTG	non_canonical_TIS	non_TIS(CCG)_to_non_canonical_TIS(CTG)	TGA	127854355	127815682	127854426	127843188	CACGCCGGCCCTGGTGCCCGCCC	0.819718305358857	strong	c.-71	c.125	0.0003	0.0029	Hereditary_hemorrhagic_telangiectasia|not_provided	MONDO:MONDO:0019180,MedGen:C0039445,OMIM:PS187300,Orphanet:ORPHA774,SNOMED_CT:21877004|MedGen:CN517202	Benign/Likely_benign
chr9	127854425	G	T	ENST00000373203.9:reverse	NM_001114753.3	ENG	.	c.-70C>A	UTR5	uTIS	out_of_frame_(1)	not_overlapping	0.0182370820668693	12/658	39	ENST00000373203.9:reverse,c.-70C>A,70,out_of_frame_(1),AGG,UTR5,non_canonical_TIS,non_TIS(CGG)_to_non_canonical_TIS(AGG),not_overlapping,12[/658](aa),39,127854355,127854425,127854389,127815682,ACGCCGGCCCAGGTGCCCGCCCG,0.579636144756365,c.-70,c.-34,weak,TAA,NM_001114753.3	NA	NA	NA	NA	NA	NA	NA	NA	AGG	non_canonical_TIS	non_TIS(CGG)_to_non_canonical_TIS(AGG)	TAA	127854355	127815682	127854425	127854389	ACGCCGGCCCAGGTGCCCGCCCG	0.579636144756365	weak	c.-70	c.-34	.	.	.	.	.
chr9	127854424	C	A	ENST00000373203.9:reverse	NM_001114753.3	ENG	.	c.-69G>T	UTR5	uTIS	out_of_frame_(1)	not_overlapping	0.0182370820668693	12/658	39	ENST00000373203.9:reverse,c.-69G>T,70,out_of_frame_(1),CTG,UTR5,non_canonical_TIS,non_TIS(CGG)_to_non_canonical_TIS(CTG),not_overlapping,12[/658](aa),39,127854355,127854425,127854389,127815682,ACGCCGGCCCCTGTGCCCGCCCG,0.579636144756365,c.-70,c.-34,weak,TAA,NM_001114753.3	NA	NA	NA	NA	NA	NA	NA	NA	CTG	non_canonical_TIS	non_TIS(CGG)_to_non_canonical_TIS(CTG)	TAA	127854355	127815682	127854425	127854389	ACGCCGGCCCCTGTGCCCGCCCG	0.579636144756365	weak	c.-70	c.-34	.	.	.	.	.
chr9	127854423	C	A	ENST00000373203.9:reverse	NM_001114753.3	ENG	.	c.-68G>T	UTR5	uTIS	out_of_frame_(2)	overlapping_6.28%	0.0972644376899696	64/658	195	ENST00000373203.9:reverse,c.-68G>T,68,out_of_frame_(2),TTG,UTR5,non_canonical_TIS,non_canonical_TIS(GTG)_to_non_canonical_TIS(TTG),overlapping_6.28%,64[/658](aa),195,127854355,127854423,127843188,127815682,GCCGGCCCCGTTGCCCGCCCGCA,0.610915488717517,c.-68,c.125,moderate,TGA,NM_001114753.3	NA	NA	NA	NA	NA	NA	NA	NA	TTG	non_canonical_TIS	non_canonical_TIS(GTG)_to_non_canonical_TIS(TTG)	TGA	127854355	127815682	127854423	127843188	GCCGGCCCCGTTGCCCGCCCGCA	0.610915488717517	weak	c.-68	c.125	.	.	.	.	.
chr9	127854423	C	G	ENST00000373203.9:reverse	NM_001114753.3	ENG	.	c.-68G>C	UTR5	uTIS	out_of_frame_(2)	overlapping_6.28%	0.0972644376899696	64/658	195	ENST00000373203.9:reverse,c.-68G>C,68,out_of_frame_(2),CTG,UTR5,non_canonical_TIS,non_canonical_TIS(GTG)_to_non_canonical_TIS(CTG),overlapping_6.28%,64[/658](aa),195,127854355,127854423,127843188,127815682,GCCGGCCCCGCTGCCCGCCCGCA,0.610915488717517,c.-68,c.125,moderate,TGA,NM_001114753.3	NA	NA	NA	NA	NA	NA	NA	NA	CTG	non_canonical_TIS	non_canonical_TIS(GTG)_to_non_canonical_TIS(CTG)	TGA	127854355	127815682	127854423	127843188	GCCGGCCCCGCTGCCCGCCCGCA	0.610915488717517	weak	c.-68	c.125	.	.	.	.	.
chr9	127854423	C	T	ENST00000373203.9:reverse	NM_001114753.3	ENG	.	c.-68G>A	UTR5	uTIS	out_of_frame_(2)	overlapping_6.28%	0.0972644376899696	64/658	195	ENST00000373203.9:reverse,c.-68G>A,68,out_of_frame_(2),ATG,UTR5,canonical_TIS,non_canonical_TIS(GTG)_to_canonical_TIS(ATG),overlapping_6.28%,64[/658](aa),195,127854355,127854423,127843188,127815682,GCCGGCCCCGATGCCCGCCCGCA,0.610915488717517,c.-68,c.125,moderate,TGA,NM_001114753.3	NA	NA	NA	NA	NA	NA	NA	NA	ATG	canonical_TIS	non_canonical_TIS(GTG)_to_canonical_TIS(ATG)	TGA	127854355	127815682	127854423	127843188	GCCGGCCCCGATGCCCGCCCGCA	0.610915488717517	weak	c.-68	c.125	.	.	.	.	.
chr9	127854419	G	T	ENST00000373203.9:reverse	NM_001114753.3	ENG	.	c.-64C>A	UTR5	uTIS	out_of_frame_(1)	not_overlapping	0.0151975683890578	10/658	33	ENST00000373203.9:reverse,c.-64C>A,64,out_of_frame_(1),ACG,UTR5,non_canonical_TIS,non_TIS(CCG)_to_non_canonical_TIS(ACG),not_overlapping,10[/658](aa),33,127854355,127854419,127854389,127815682,GCCCCGGTGCACGCCCGCAGCCC,0.56883802733416,c.-64,c.-34,moderate,TAA,NM_001114753.3	NA	NA	NA	NA	NA	NA	NA	NA	ACG	non_canonical_TIS	non_TIS(CCG)_to_non_canonical_TIS(ACG)	TAA	127854355	127815682	127854419	127854389	GCCCCGGTGCACGCCCGCAGCCC	0.56883802733416	weak	c.-64	c.-34	.	.	.	.	.
chr9	127854418	G	A	ENST00000373203.9:reverse	NM_001114753.3	ENG	rs886063476	c.-63C>T	UTR5	uTIS	out_of_frame_(1)	not_overlapping	0.0151975683890578	10/658	33	ENST00000373203.9:reverse,c.-63C>T,64,out_of_frame_(1),CTG,UTR5,non_canonical_TIS,non_TIS(CCG)_to_non_canonical_TIS(CTG),not_overlapping,10[/658](aa),33,127854355,127854419,127854389,127815682,GCCCCGGTGCCTGCCCGCAGCCC,0.56883802733416,c.-64,c.-34,moderate,TAA,NM_001114753.3	NA	NA	NA	NA	NA	NA	NA	NA	CTG	non_canonical_TIS	non_TIS(CCG)_to_non_canonical_TIS(CTG)	TAA	127854355	127815682	127854419	127854389	GCCCCGGTGCCTGCCCGCAGCCC	0.56883802733416	weak	c.-64	c.-34	0.0002	8.819e-05	Telangiectasia,_hereditary_hemorrhagic,_type_1	MONDO:MONDO:0008535,MedGen:C4551861,OMIM:187300	Uncertain_significance
chr9	127854415	G	T	ENST00000373203.9:reverse	NM_001114753.3	ENG	.	c.-60C>A	UTR5	uTIS	in_frame	elongated_CDS	1.03039513677812	678/658	2037	ENST00000373203.9:reverse,c.-60C>A,60,in_frame,ACG,UTR5,non_canonical_TIS,non_TIS(CCG)_to_non_canonical_TIS(ACG),elongated_CDS,678[/658](aa),2037,127854355,127854415,127815684,127815682,CGGTGCCCGCACGCAGCCCTGCC,0.619718309105336,c.-60,c.1975,weak,TAG,NM_001114753.3	NA	NA	NA	NA	NA	NA	NA	NA	ACG	non_canonical_TIS	non_TIS(CCG)_to_non_canonical_TIS(ACG)	TAG	127854355	127815682	127854415	127815684	CGGTGCCCGCACGCAGCCCTGCC	0.619718309105336	weak	c.-60	c.1975	.	.	.	.	.
chr9	127854414	G	A	ENST00000373203.9:reverse	NM_001114753.3	ENG	rs1003149967	c.-59C>T	UTR5	uTIS	in_frame	elongated_CDS	1.03039513677812	678/658	2037	ENST00000373203.9:reverse,c.-59C>T,60,in_frame,CTG,UTR5,non_canonical_TIS,non_TIS(CCG)_to_non_canonical_TIS(CTG),elongated_CDS,678[/658](aa),2037,127854355,127854415,127815684,127815682,CGGTGCCCGCCTGCAGCCCTGCC,0.619718309105336,c.-60,c.1975,weak,TAG,NM_001114753.3	NA	NA	NA	NA	NA	NA	NA	NA	CTG	non_canonical_TIS	non_TIS(CCG)_to_non_canonical_TIS(CTG)	TAG	127854355	127815682	127854415	127815684	CGGTGCCCGCCTGCAGCCCTGCC	0.619718309105336	weak	c.-60	c.1975	1.971e-05	4.41e-05	Telangiectasia,_hereditary_hemorrhagic,_type_1	MONDO:MONDO:0008535,MedGen:C4551861,OMIM:187300	Uncertain_significance
chr9	127854412	G	T	ENST00000373203.9:reverse	NM_001114753.3	ENG	.	c.-57C>A	UTR5	uTIS	in_frame	elongated_CDS	1.02887537993921	677/658	2034	ENST00000373203.9:reverse,c.-57C>A,57,in_frame,AAG,UTR5,non_canonical_TIS,non_TIS(CAG)_to_non_canonical_TIS(AAG),elongated_CDS,677[/658](aa),2034,127854355,127854412,127815684,127815682,TGCCCGCCCGAAGCCCTGCCACT,0.552112672611387,c.-57,c.1975,weak,TAG,NM_001114753.3	NA	NA	NA	NA	NA	NA	NA	NA	AAG	non_canonical_TIS	non_TIS(CAG)_to_non_canonical_TIS(AAG)	TAG	127854355	127815682	127854412	127815684	TGCCCGCCCGAAGCCCTGCCACT	0.552112672611387	weak	c.-57	c.1975	.	.	.	.	.
chr9	127854411	T	A	ENST00000373203.9:reverse	NM_001114753.3	ENG	.	c.-56A>T	UTR5	uTIS	in_frame	elongated_CDS	1.02887537993921	677/658	2034	ENST00000373203.9:reverse,c.-56A>T,57,in_frame,CTG,UTR5,non_canonical_TIS,non_TIS(CAG)_to_non_canonical_TIS(CTG),elongated_CDS,677[/658](aa),2034,127854355,127854412,127815684,127815682,TGCCCGCCCGCTGCCCTGCCACT,0.552112672611387,c.-57,c.1975,weak,TAG,NM_001114753.3	NA	NA	NA	NA	NA	NA	NA	NA	CTG	non_canonical_TIS	non_TIS(CAG)_to_non_canonical_TIS(CTG)	TAG	127854355	127815682	127854412	127815684	TGCCCGCCCGCTGCCCTGCCACT	0.552112672611387	weak	c.-57	c.1975	.	.	.	.	.
chr9	127854410	C	A	ENST00000373203.9:reverse	NM_001114753.3	ENG	.	c.-55G>T	UTR5	uTIS	out_of_frame_(2)	overlapping_6.28%	0.0911854103343465	60/658	183	ENST00000373203.9:reverse,c.-55G>T,56,out_of_frame_(2),ATC,UTR5,non_canonical_TIS,non_TIS(AGC)_to_non_canonical_TIS(ATC),overlapping_6.28%,60[/658](aa),183,127854355,127854411,127843188,127815682,GCCCGCCCGCATCCCTGCCACTG,0.642077460848145,c.-56,c.125,moderate,TGA,NM_001114753.3	NA	NA	NA	NA	NA	NA	NA	NA	ATC	non_canonical_TIS	non_TIS(AGC)_to_non_canonical_TIS(ATC)	TGA	127854355	127815682	127854411	127843188	GCCCGCCCGCATCCCTGCCACTG	0.642077460848145	weak	c.-56	c.125	.	.	.	.	.
chr9	127854409	G	C	ENST00000373203.9:reverse	NM_001114753.3	ENG	.	c.-54C>G	UTR5	uTIS	out_of_frame_(2)	overlapping_6.28%	0.0911854103343465	60/658	183	ENST00000373203.9:reverse,c.-54C>G,56,out_of_frame_(2),AGG,UTR5,non_canonical_TIS,non_TIS(AGC)_to_non_canonical_TIS(AGG),overlapping_6.28%,60[/658](aa),183,127854355,127854411,127843188,127815682,GCCCGCCCGCAGGCCTGCCACTG,0.642077460848145,c.-56,c.125,moderate,TGA,NM_001114753.3	NA	NA	NA	NA	NA	NA	NA	NA	AGG	non_canonical_TIS	non_TIS(AGC)_to_non_canonical_TIS(AGG)	TGA	127854355	127815682	127854411	127843188	GCCCGCCCGCAGGCCTGCCACTG	0.642077460848145	weak	c.-56	c.125	.	.	.	.	.
chr9	127854407	G	A	ENST00000373203.9:reverse	NM_001114753.3	ENG	.	c.-52C>T	UTR5	uTIS	out_of_frame_(1)	not_overlapping	0.00911854103343465	6/658	21	ENST00000373203.9:reverse,c.-52C>T,52,out_of_frame_(1),TTG,UTR5,non_canonical_TIS,non_canonical_TIS(CTG)_to_non_canonical_TIS(TTG),not_overlapping,6[/658](aa),21,127854355,127854407,127854389,127815682,GCCCGCAGCCTTGCCACTGGACA,0.743309856505257,c.-52,c.-34,moderate,TAA,NM_001114753.3	NA	NA	NA	NA	NA	NA	NA	NA	TTG	non_canonical_TIS	non_canonical_TIS(CTG)_to_non_canonical_TIS(TTG)	TAA	127854355	127815682	127854407	127854389	GCCCGCAGCCTTGCCACTGGACA	0.743309856505257	moderate	c.-52	c.-34	.	.	.	.	.
chr9	127854407	G	C	ENST00000373203.9:reverse	NM_001114753.3	ENG	.	c.-52C>G	UTR5	uTIS	out_of_frame_(1)	not_overlapping	0.00911854103343465	6/658	21	ENST00000373203.9:reverse,c.-52C>G,52,out_of_frame_(1),GTG,UTR5,non_canonical_TIS,non_canonical_TIS(CTG)_to_non_canonical_TIS(GTG),not_overlapping,6[/658](aa),21,127854355,127854407,127854389,127815682,GCCCGCAGCCGTGCCACTGGACA,0.743309856505257,c.-52,c.-34,moderate,TAA,NM_001114753.3	NA	NA	NA	NA	NA	NA	NA	NA	GTG	non_canonical_TIS	non_canonical_TIS(CTG)_to_non_canonical_TIS(GTG)	TAA	127854355	127815682	127854407	127854389	GCCCGCAGCCGTGCCACTGGACA	0.743309856505257	moderate	c.-52	c.-34	.	.	.	.	.
chr9	127854407	G	T	ENST00000373203.9:reverse	NM_001114753.3	ENG	.	c.-52C>A	UTR5	uTIS	out_of_frame_(1)	not_overlapping	0.00911854103343465	6/658	21	ENST00000373203.9:reverse,c.-52C>A,52,out_of_frame_(1),ATG,UTR5,canonical_TIS,non_canonical_TIS(CTG)_to_canonical_TIS(ATG),not_overlapping,6[/658](aa),21,127854355,127854407,127854389,127815682,GCCCGCAGCCATGCCACTGGACA,0.743309856505257,c.-52,c.-34,moderate,TAA,NM_001114753.3	NA	NA	NA	NA	NA	NA	NA	NA	ATG	canonical_TIS	non_canonical_TIS(CTG)_to_canonical_TIS(ATG)	TAA	127854355	127815682	127854407	127854389	GCCCGCAGCCATGCCACTGGACA	0.743309856505257	moderate	c.-52	c.-34	.	.	.	.	.
chr9	127854401	G	A	ENST00000373203.9:reverse; ENST00000373203.9:reverse	NM_001114753.3; NM_001114753.3	ENG	.	c.-46C>T; c.-46C>T	UTR5	uTIS	out_of_frame_(1); out_of_frame_(2)	not_overlapping; overlapping_6.28%	0.0866261398176292	4/658; 57/658	15; 174	ENST00000373203.9:reverse,c.-46C>T,46,out_of_frame_(1),TTG,UTR5,non_canonical_TIS,non_canonical_TIS(CTG)_to_non_canonical_TIS(TTG),not_overlapping,4[/658](aa),15,127854355,127854401,127854389,127815682,AGCCCTGCCATTGGACACAGGAT,0.599593436931181,c.-46,c.-34,weak,TAA,NM_001114753.3|ENST00000373203.9:reverse,c.-46C>T,47,out_of_frame_(2),ATT,UTR5,non_canonical_TIS,non_TIS(ACT)_to_non_canonical_TIS(ATT…	NA	NA	NA	NA	NA	NA	NA	NA	TTG; ATT	non_canonical_TIS; non_canonical_TIS	non_canonical_TIS(CTG)_to_non_canonical_TIS(TTG); non_TIS(ACT)_to_non_canonical_TIS(ATT)	TAA; TGA	127854355; 127854355	127815682; 127815682	127854401; 127854402	127854389; 127843188	AGCCCTGCCATTGGACACAGGAT; CAGCCCTGCCATTGGACACAGGA	0.599593436931181; 0.763028166145804	moderate; strong	c.-46; c.-47	c.-34; c.125	.	.	.	.	.
chr9	127854401	G	C	ENST00000373203.9:reverse	NM_001114753.3	ENG	.	c.-46C>G	UTR5	uTIS	out_of_frame_(1)	not_overlapping	0.0060790273556231	4/658	15	ENST00000373203.9:reverse,c.-46C>G,46,out_of_frame_(1),GTG,UTR5,non_canonical_TIS,non_canonical_TIS(CTG)_to_non_canonical_TIS(GTG),not_overlapping,4[/658](aa),15,127854355,127854401,127854389,127815682,AGCCCTGCCAGTGGACACAGGAT,0.599593436931181,c.-46,c.-34,weak,TAA,NM_001114753.3	NA	NA	NA	NA	NA	NA	NA	NA	GTG	non_canonical_TIS	non_canonical_TIS(CTG)_to_non_canonical_TIS(GTG)	TAA	127854355	127815682	127854401	127854389	AGCCCTGCCAGTGGACACAGGAT	0.599593436931181	moderate	c.-46	c.-34	.	.	.	.	.
chr9	127854401	G	T	ENST00000373203.9:reverse	NM_001114753.3	ENG	.	c.-46C>A	UTR5	uTIS	out_of_frame_(1)	not_overlapping	0.0060790273556231	4/658	15	ENST00000373203.9:reverse,c.-46C>A,46,out_of_frame_(1),ATG,UTR5,canonical_TIS,non_canonical_TIS(CTG)_to_canonical_TIS(ATG),not_overlapping,4[/658](aa),15,127854355,127854401,127854389,127815682,AGCCCTGCCAATGGACACAGGAT,0.599593436931181,c.-46,c.-34,weak,TAA,NM_001114753.3	NA	NA	NA	NA	NA	NA	NA	NA	ATG	canonical_TIS	non_canonical_TIS(CTG)_to_canonical_TIS(ATG)	TAA	127854355	127815682	127854401	127854389	AGCCCTGCCAATGGACACAGGAT	0.599593436931181	moderate	c.-46	c.-34	.	.	.	.	.
chr9	127854400	A	C	ENST00000373203.9:reverse	NM_001114753.3	ENG	.	c.-45T>G	UTR5	uTIS	out_of_frame_(2)	overlapping_6.28%	0.0866261398176292	57/658	174	ENST00000373203.9:reverse,c.-45T>G,47,out_of_frame_(2),ACG,UTR5,non_canonical_TIS,non_TIS(ACT)_to_non_canonical_TIS(ACG),overlapping_6.28%,57[/658](aa),174,127854355,127854402,127843188,127815682,CAGCCCTGCCACGGGACACAGGA,0.763028166145804,c.-47,c.125,moderate,TGA,NM_001114753.3	NA	NA	NA	NA	NA	NA	NA	NA	ACG	non_canonical_TIS	non_TIS(ACT)_to_non_canonical_TIS(ACG)	TGA	127854355	127815682	127854402	127843188	CAGCCCTGCCACGGGACACAGGA	0.763028166145804	strong	c.-47	c.125	.	.	.	.	.
chr9	127854400	A	T	ENST00000373203.9:reverse	NM_001114753.3	ENG	.	c.-45T>A	UTR5	uTIS	in_frame	elongated_CDS	1.02279635258359	673/658	2022	ENST00000373203.9:reverse,c.-45T>A,45,in_frame,AGG,UTR5,non_canonical_TIS,non_TIS(TGG)_to_non_canonical_TIS(AGG),elongated_CDS,673[/658](aa),2022,127854355,127854400,127815684,127815682,GCCCTGCCACAGGACACAGGATA,0.605281686345368,c.-45,c.1975,weak,TAG,NM_001114753.3	NA	NA	NA	NA	NA	NA	NA	NA	AGG	non_canonical_TIS	non_TIS(TGG)_to_non_canonical_TIS(AGG)	TAG	127854355	127815682	127854400	127815684	GCCCTGCCACAGGACACAGGATA	0.605281686345368	weak	c.-45	c.1975	.	.	.	.	.
chr9	127854399	C	A	ENST00000373203.9:reverse	NM_001114753.3	ENG	.	c.-44G>T	UTR5	uTIS	in_frame	elongated_CDS	1.02279635258359	673/658	2022	ENST00000373203.9:reverse,c.-44G>T,45,in_frame,TTG,UTR5,non_canonical_TIS,non_TIS(TGG)_to_non_canonical_TIS(TTG),elongated_CDS,673[/658](aa),2022,127854355,127854400,127815684,127815682,GCCCTGCCACTTGACACAGGATA,0.605281686345368,c.-45,c.1975,weak,TAG,NM_001114753.3	NA	NA	NA	NA	NA	NA	NA	NA	TTG	non_canonical_TIS	non_TIS(TGG)_to_non_canonical_TIS(TTG)	TAG	127854355	127815682	127854400	127815684	GCCCTGCCACTTGACACAGGATA	0.605281686345368	weak	c.-45	c.1975	.	.	.	.	.
chr9	127854396	G	A	ENST00000373203.9:reverse	NM_001114753.3	ENG	.	c.-41C>T	UTR5	uTIS	in_frame	elongated_CDS	1.02127659574468	672/658	2019	ENST00000373203.9:reverse,c.-41C>T,42,in_frame,ATA,UTR5,non_canonical_TIS,non_TIS(ACA)_to_non_canonical_TIS(ATA),elongated_CDS,672[/658](aa),2019,127854355,127854397,127815684,127815682,CTGCCACTGGATACAGGATAAGG,0.521126760902599,c.-42,c.1975,moderate,TAG,NM_001114753.3	NA	NA	NA	NA	NA	NA	NA	NA	ATA	non_canonical_TIS	non_TIS(ACA)_to_non_canonical_TIS(ATA)	TAG	127854355	127815682	127854397	127815684	CTGCCACTGGATACAGGATAAGG	0.521126760902599	weak	c.-42	c.1975	.	.	.	.	.
chr9	127854395	T	C	ENST00000373203.9:reverse	NM_001114753.3	ENG	.	c.-40A>G	UTR5	uTIS	in_frame	elongated_CDS	1.02127659574468	672/658	2019	ENST00000373203.9:reverse,c.-40A>G,42,in_frame,ACG,UTR5,non_canonical_TIS,non_TIS(ACA)_to_non_canonical_TIS(ACG),elongated_CDS,672[/658](aa),2019,127854355,127854397,127815684,127815682,CTGCCACTGGACGCAGGATAAGG,0.521126760902599,c.-42,c.1975,moderate,TAG,NM_001114753.3	NA	NA	NA	NA	NA	NA	NA	NA	ACG	non_canonical_TIS	non_TIS(ACA)_to_non_canonical_TIS(ACG)	TAG	127854355	127815682	127854397	127815684	CTGCCACTGGACGCAGGATAAGG	0.521126760902599	weak	c.-42	c.1975	6.573e-06	1.47e-05	.	.	.
chr9	127854394	G	A	ENST00000373203.9:reverse	NM_001114753.3	ENG	.	c.-39C>T	UTR5	uTIS	out_of_frame_(1)	not_overlapping	0.00303951367781155	2/658	9	ENST00000373203.9:reverse,c.-39C>T,40,out_of_frame_(1),ATA,UTR5,non_canonical_TIS,non_TIS(ACA)_to_non_canonical_TIS(ATA),not_overlapping,2[/658](aa),9,127854355,127854395,127854389,127815682,GCCACTGGACATAGGATAAGGCC,0.743485916927098,c.-40,c.-34,moderate,TAA,NM_001114753.3	NA	NA	NA	NA	NA	NA	NA	NA	ATA	non_canonical_TIS	non_TIS(ACA)_to_non_canonical_TIS(ATA)	TAA	127854355	127815682	127854395	127854389	GCCACTGGACATAGGATAAGGCC	0.743485916927098	strong	c.-40	c.-34	.	.	.	.	.
chr9	127854394	G	T	ENST00000373203.9:reverse	NM_001114753.3	ENG	.	c.-39C>A	UTR5	uTIS	in_frame	elongated_CDS	1.01975683890578	671/658	2016	ENST00000373203.9:reverse,c.-39C>A,39,in_frame,AAG,UTR5,non_canonical_TIS,non_TIS(CAG)_to_non_canonical_TIS(AAG),elongated_CDS,671[/658](aa),2016,127854355,127854394,127815684,127815682,CCACTGGACAAAGGATAAGGCCC,0.757163864337946,c.-39,c.1975,moderate,TAG,NM_001114753.3	NA	NA	NA	NA	NA	NA	NA	NA	AAG	non_canonical_TIS	non_TIS(CAG)_to_non_canonical_TIS(AAG)	TAG	127854355	127815682	127854394	127815684	CCACTGGACAAAGGATAAGGCCC	0.757163864337946	strong	c.-39	c.1975	.	.	.	.	.
chr9	127854393	T	A	ENST00000373203.9:reverse	NM_001114753.3	ENG	rs775506292	c.-38A>T	UTR5	uTIS	in_frame	elongated_CDS	1.01975683890578	671/658	2016	ENST00000373203.9:reverse,c.-38A>T,39,in_frame,CTG,UTR5,non_canonical_TIS,non_TIS(CAG)_to_non_canonical_TIS(CTG),elongated_CDS,671[/658](aa),2016,127854355,127854394,127815684,127815682,CCACTGGACACTGGATAAGGCCC,0.757163864337946,c.-39,c.1975,moderate,TAG,NM_001114753.3	NA	NA	NA	NA	NA	NA	NA	NA	CTG	non_canonical_TIS	non_TIS(CAG)_to_non_canonical_TIS(CTG)	TAG	127854355	127815682	127854394	127815684	CCACTGGACACTGGATAAGGCCC	0.757163864337946	strong	c.-39	c.1975	.	.	.	.	.
chr9	127854393	T	C	ENST00000373203.9:reverse	NM_001114753.3	ENG	.	c.-38A>G	UTR5	uTIS	out_of_frame_(1)	not_overlapping	0.00303951367781155	2/658	9	ENST00000373203.9:reverse,c.-38A>G,40,out_of_frame_(1),ACG,UTR5,non_canonical_TIS,non_TIS(ACA)_to_non_canonical_TIS(ACG),not_overlapping,2[/658](aa),9,127854355,127854395,127854389,127815682,GCCACTGGACACGGGATAAGGCC,0.743485916927098,c.-40,c.-34,moderate,TAA,NM_001114753.3	NA	NA	NA	NA	NA	NA	NA	NA	ACG	non_canonical_TIS	non_TIS(ACA)_to_non_canonical_TIS(ACG)	TAA	127854355	127815682	127854395	127854389	GCCACTGGACACGGGATAAGGCC	0.743485916927098	strong	c.-40	c.-34	.	.	.	.	.
chr9	127854392	C	A	ENST00000373203.9:reverse	NM_001114753.3	ENG	.	c.-37G>T	UTR5	uTIS	out_of_frame_(2)	overlapping_6.28%	0.0820668693009119	54/658	165	ENST00000373203.9:reverse,c.-37G>T,38,out_of_frame_(2),ATG,UTR5,canonical_TIS,non_canonical_TIS(AGG)_to_canonical_TIS(ATG),overlapping_6.28%,54[/658](aa),165,127854355,127854393,127843188,127815682,CACTGGACACATGATAAGGCCCA,0.571248361972542,c.-38,c.125,weak,TGA,NM_001114753.3	NA	NA	NA	NA	NA	NA	NA	NA	ATG	canonical_TIS	non_canonical_TIS(AGG)_to_canonical_TIS(ATG)	TGA	127854355	127815682	127854393	127843188	CACTGGACACATGATAAGGCCCA	0.571248361972542	weak	c.-38	c.125	.	.	.	.	.
chr9	127854392	C	G	ENST00000373203.9:reverse	NM_001114753.3	ENG	.	c.-37G>C	UTR5	uTIS	out_of_frame_(2)	overlapping_6.28%	0.0820668693009119	54/658	165	ENST00000373203.9:reverse,c.-37G>C,38,out_of_frame_(2),ACG,UTR5,non_canonical_TIS,non_canonical_TIS(AGG)_to_non_canonical_TIS(ACG),overlapping_6.28%,54[/658](aa),165,127854355,127854393,127843188,127815682,CACTGGACACACGATAAGGCCCA,0.571248361972542,c.-38,c.125,weak,TGA,NM_001114753.3	NA	NA	NA	NA	NA	NA	NA	NA	ACG	non_canonical_TIS	non_canonical_TIS(AGG)_to_non_canonical_TIS(ACG)	TGA	127854355	127815682	127854393	127843188	CACTGGACACACGATAAGGCCCA	0.571248361972542	weak	c.-38	c.125	.	.	.	.	.
chr9	127854392	C	T	ENST00000373203.9:reverse	NM_001114753.3	ENG	.	c.-37G>A	UTR5	uTIS	out_of_frame_(2)	overlapping_6.28%	0.0820668693009119	54/658	165	ENST00000373203.9:reverse,c.-37G>A,38,out_of_frame_(2),AAG,UTR5,non_canonical_TIS,non_canonical_TIS(AGG)_to_non_canonical_TIS(AAG),overlapping_6.28%,54[/658](aa),165,127854355,127854393,127843188,127815682,CACTGGACACAAGATAAGGCCCA,0.571248361972542,c.-38,c.125,weak,TGA,NM_001114753.3	NA	NA	NA	NA	NA	NA	NA	NA	AAG	non_canonical_TIS	non_canonical_TIS(AGG)_to_non_canonical_TIS(AAG)	TGA	127854355	127815682	127854393	127843188	CACTGGACACAAGATAAGGCCCA	0.571248361972542	weak	c.-38	c.125	.	.	.	.	.
chr9	127854388	T	A	ENST00000373203.9:reverse	NM_001114753.3	ENG	.	c.-33A>T	UTR5	uTIS	out_of_frame_(2)	overlapping_6.28%	0.0805471124620061	53/658	162	ENST00000373203.9:reverse,c.-33A>T,35,out_of_frame_(2),ATT,UTR5,non_canonical_TIS,non_canonical_TIS(ATA)_to_non_canonical_TIS(ATT),overlapping_6.28%,53[/658](aa),162,127854355,127854390,127843188,127815682,TGGACACAGGATTAGGCCCAGCG,0.726760556852212,c.-35,c.125,moderate,TGA,NM_001114753.3	NA	NA	NA	NA	NA	NA	NA	NA	ATT	non_canonical_TIS	non_canonical_TIS(ATA)_to_non_canonical_TIS(ATT)	TGA	127854355	127815682	127854390	127843188	TGGACACAGGATTAGGCCCAGCG	0.726760556852212	moderate	c.-35	c.125	.	.	.	.	.
chr9	127854388	T	C	ENST00000373203.9:reverse	NM_001114753.3	ENG	.	c.-33A>G	UTR5	uTIS	out_of_frame_(2)	overlapping_6.28%	0.0805471124620061	53/658	162	ENST00000373203.9:reverse,c.-33A>G,35,out_of_frame_(2),ATG,UTR5,canonical_TIS,non_canonical_TIS(ATA)_to_canonical_TIS(ATG),overlapping_6.28%,53[/658](aa),162,127854355,127854390,127843188,127815682,TGGACACAGGATGAGGCCCAGCG,0.726760556852212,c.-35,c.125,moderate,TGA,NM_001114753.3	NA	NA	NA	NA	NA	NA	NA	NA	ATG	canonical_TIS	non_canonical_TIS(ATA)_to_canonical_TIS(ATG)	TGA	127854355	127815682	127854390	127843188	TGGACACAGGATGAGGCCCAGCG	0.726760556852212	moderate	c.-35	c.125	.	.	.	.	.
chr9	127854388	T	G	ENST00000373203.9:reverse	NM_001114753.3	ENG	.	c.-33A>C	UTR5	uTIS	out_of_frame_(2)	overlapping_6.28%	0.0805471124620061	53/658	162	ENST00000373203.9:reverse,c.-33A>C,35,out_of_frame_(2),ATC,UTR5,non_canonical_TIS,non_canonical_TIS(ATA)_to_non_canonical_TIS(ATC),overlapping_6.28%,53[/658](aa),162,127854355,127854390,127843188,127815682,TGGACACAGGATCAGGCCCAGCG,0.726760556852212,c.-35,c.125,moderate,TGA,NM_001114753.3	NA	NA	NA	NA	NA	NA	NA	NA	ATC	non_canonical_TIS	non_canonical_TIS(ATA)_to_non_canonical_TIS(ATC)	TGA	127854355	127815682	127854390	127843188	TGGACACAGGATCAGGCCCAGCG	0.726760556852212	moderate	c.-35	c.125	.	.	.	.	.
chr9	127854387	T	A	ENST00000373203.9:reverse	NM_001114753.3	ENG	.	c.-32A>T	UTR5	uTIS	in_frame	elongated_CDS	1.01671732522796	669/658	2010	ENST00000373203.9:reverse,c.-32A>T,33,in_frame,ATG,UTR5,canonical_TIS,non_canonical_TIS(AAG)_to_canonical_TIS(ATG),elongated_CDS,669[/658](aa),2010,127854355,127854388,127815684,127815682,GACACAGGATATGGCCCAGCGCA,0.689964785025491,c.-33,c.1975,moderate,TAG,NM_001114753.3	NA	NA	NA	NA	NA	NA	NA	NA	ATG	canonical_TIS	non_canonical_TIS(AAG)_to_canonical_TIS(ATG)	TAG	127854355	127815682	127854388	127815684	GACACAGGATATGGCCCAGCGCA	0.689964785025491	strong	c.-33	c.1975	.	.	.	.	.
chr9	127854387	T	C	ENST00000373203.9:reverse	NM_001114753.3	ENG	.	c.-32A>G	UTR5	uTIS	in_frame	elongated_CDS	1.01671732522796	669/658	2010	ENST00000373203.9:reverse,c.-32A>G,33,in_frame,AGG,UTR5,non_canonical_TIS,non_canonical_TIS(AAG)_to_non_canonical_TIS(AGG),elongated_CDS,669[/658](aa),2010,127854355,127854388,127815684,127815682,GACACAGGATAGGGCCCAGCGCA,0.689964785025491,c.-33,c.1975,moderate,TAG,NM_001114753.3	NA	NA	NA	NA	NA	NA	NA	NA	AGG	non_canonical_TIS	non_canonical_TIS(AAG)_to_non_canonical_TIS(AGG)	TAG	127854355	127815682	127854388	127815684	GACACAGGATAGGGCCCAGCGCA	0.689964785025491	strong	c.-33	c.1975	.	.	.	.	.
chr9	127854387	T	G	ENST00000373203.9:reverse	NM_001114753.3	ENG	.	c.-32A>C	UTR5	uTIS	in_frame	elongated_CDS	1.01671732522796	669/658	2010	ENST00000373203.9:reverse,c.-32A>C,33,in_frame,ACG,UTR5,non_canonical_TIS,non_canonical_TIS(AAG)_to_non_canonical_TIS(ACG),elongated_CDS,669[/658](aa),2010,127854355,127854388,127815684,127815682,GACACAGGATACGGCCCAGCGCA,0.689964785025491,c.-33,c.1975,moderate,TAG,NM_001114753.3	NA	NA	NA	NA	NA	NA	NA	NA	ACG	non_canonical_TIS	non_canonical_TIS(AAG)_to_non_canonical_TIS(ACG)	TAG	127854355	127815682	127854388	127815684	GACACAGGATACGGCCCAGCGCA	0.689964785025491	strong	c.-33	c.1975	.	.	.	.	.
chr9	127854386	C	A	ENST00000373203.9:reverse	NM_001114753.3	ENG	.	c.-31G>T	UTR5	uTIS	out_of_frame_(2)	overlapping_6.28%	0.0790273556231003	52/658	159	ENST00000373203.9:reverse,c.-31G>T,32,out_of_frame_(2),ATG,UTR5,canonical_TIS,non_canonical_TIS(AGG)_to_canonical_TIS(ATG),overlapping_6.28%,52[/658](aa),159,127854355,127854387,127843188,127815682,ACACAGGATAATGCCCAGCGCAC,0.627586393722195,c.-32,c.125,moderate,TGA,NM_001114753.3	NA	NA	NA	NA	NA	NA	NA	NA	ATG	canonical_TIS	non_canonical_TIS(AGG)_to_canonical_TIS(ATG)	TGA	127854355	127815682	127854387	127843188	ACACAGGATAATGCCCAGCGCAC	0.627586393722195	moderate	c.-32	c.125	.	.	.	.	.
chr9	127854386	C	G	ENST00000373203.9:reverse	NM_001114753.3	ENG	.	c.-31G>C	UTR5	uTIS	out_of_frame_(2)	overlapping_6.28%	0.0790273556231003	52/658	159	ENST00000373203.9:reverse,c.-31G>C,32,out_of_frame_(2),ACG,UTR5,non_canonical_TIS,non_canonical_TIS(AGG)_to_non_canonical_TIS(ACG),overlapping_6.28%,52[/658](aa),159,127854355,127854387,127843188,127815682,ACACAGGATAACGCCCAGCGCAC,0.627586393722195,c.-32,c.125,moderate,TGA,NM_001114753.3	NA	NA	NA	NA	NA	NA	NA	NA	ACG	non_canonical_TIS	non_canonical_TIS(AGG)_to_non_canonical_TIS(ACG)	TGA	127854355	127815682	127854387	127843188	ACACAGGATAACGCCCAGCGCAC	0.627586393722195	moderate	c.-32	c.125	.	.	.	.	.
chr9	127854386	C	T	ENST00000373203.9:reverse	NM_001114753.3	ENG	.	c.-31G>A	UTR5	uTIS	out_of_frame_(2)	overlapping_6.28%	0.0790273556231003	52/658	159	ENST00000373203.9:reverse,c.-31G>A,32,out_of_frame_(2),AAG,UTR5,non_canonical_TIS,non_canonical_TIS(AGG)_to_non_canonical_TIS(AAG),overlapping_6.28%,52[/658](aa),159,127854355,127854387,127843188,127815682,ACACAGGATAAAGCCCAGCGCAC,0.627586393722195,c.-32,c.125,moderate,TGA,NM_001114753.3	NA	NA	NA	NA	NA	NA	NA	NA	AAG	non_canonical_TIS	non_canonical_TIS(AGG)_to_non_canonical_TIS(AAG)	TGA	127854355	127815682	127854387	127843188	ACACAGGATAAAGCCCAGCGCAC	0.627586393722195	moderate	c.-32	c.125	.	.	.	.	.
chr9	127854382	G	T	ENST00000373203.9:reverse	NM_001114753.3	ENG	.	c.-27C>A	UTR5	uTIS	in_frame	elongated_CDS	1.01367781155015	667/658	2004	ENST00000373203.9:reverse,c.-27C>A,27,in_frame,AAG,UTR5,non_canonical_TIS,non_TIS(CAG)_to_non_canonical_TIS(AAG),elongated_CDS,667[/658](aa),2004,127854355,127854382,127815684,127815682,GGATAAGGCCAAGCGCACAGGCC,0.664382170901028,c.-27,c.1975,moderate,TAG,NM_001114753.3	NA	NA	NA	NA	NA	NA	NA	NA	AAG	non_canonical_TIS	non_TIS(CAG)_to_non_canonical_TIS(AAG)	TAG	127854355	127815682	127854382	127815684	GGATAAGGCCAAGCGCACAGGCC	0.664382170901028	moderate	c.-27	c.1975	.	.	.	.	.
chr9	127854381	T	A	ENST00000373203.9:reverse	NM_001114753.3	ENG	.	c.-26A>T	UTR5	uTIS	in_frame	elongated_CDS	1.01367781155015	667/658	2004	ENST00000373203.9:reverse,c.-26A>T,27,in_frame,CTG,UTR5,non_canonical_TIS,non_TIS(CAG)_to_non_canonical_TIS(CTG),elongated_CDS,667[/658](aa),2004,127854355,127854382,127815684,127815682,GGATAAGGCCCTGCGCACAGGCC,0.664382170901028,c.-27,c.1975,moderate,TAG,NM_001114753.3	NA	NA	NA	NA	NA	NA	NA	NA	CTG	non_canonical_TIS	non_TIS(CAG)_to_non_canonical_TIS(CTG)	TAG	127854355	127815682	127854382	127815684	GGATAAGGCCCTGCGCACAGGCC	0.664382170901028	moderate	c.-27	c.1975	.	.	.	.	.
chr9	127854380	C	A	ENST00000373203.9:reverse	NM_001114753.3	ENG	.	c.-25G>T	UTR5	uTIS	out_of_frame_(2)	overlapping_6.28%	0.0759878419452888	50/658	153	ENST00000373203.9:reverse,c.-25G>T,26,out_of_frame_(2),ATC,UTR5,non_canonical_TIS,non_TIS(AGC)_to_non_canonical_TIS(ATC),overlapping_6.28%,50[/658](aa),153,127854355,127854381,127843188,127815682,GATAAGGCCCATCGCACAGGCCC,0.661971828234477,c.-26,c.125,weak,TGA,NM_001114753.3	NA	NA	NA	NA	NA	NA	NA	NA	ATC	non_canonical_TIS	non_TIS(AGC)_to_non_canonical_TIS(ATC)	TGA	127854355	127815682	127854381	127843188	GATAAGGCCCATCGCACAGGCCC	0.661971828234477	moderate	c.-26	c.125	.	.	.	.	.
chr9	127854380	C	T	ENST00000373203.9:reverse	NM_001114753.3	ENG	.	c.-25G>A	UTR5	uTIS	out_of_frame_(1)	overlapping_4.51%	0.0577507598784195	38/658	117	ENST00000373203.9:reverse,c.-25G>A,25,out_of_frame_(1),ACG,UTR5,non_canonical_TIS,non_TIS(GCG)_to_non_canonical_TIS(ACG),overlapping_4.51%,38[/658](aa),117,127854355,127854380,127843223,127815682,ATAAGGCCCAACGCACAGGCCCC,0.515086395996842,c.-25,c.90,weak,TGA,NM_001114753.3	NA	NA	NA	NA	NA	NA	NA	NA	ACG	non_canonical_TIS	non_TIS(GCG)_to_non_canonical_TIS(ACG)	TGA	127854355	127815682	127854380	127843223	ATAAGGCCCAACGCACAGGCCCC	0.515086395996842	weak	c.-25	c.90	.	.	.	.	.
chr9	127854379	G	A	ENST00000373203.9:reverse	NM_001114753.3	ENG	rs769883395	c.-24C>T	UTR5	uTIS	out_of_frame_(1)	overlapping_4.51%	0.0577507598784195	38/658	117	ENST00000373203.9:reverse,c.-24C>T,25,out_of_frame_(1),GTG,UTR5,non_canonical_TIS,non_TIS(GCG)_to_non_canonical_TIS(GTG),overlapping_4.51%,38[/658](aa),117,127854355,127854380,127843223,127815682,ATAAGGCCCAGTGCACAGGCCCC,0.515086395996842,c.-25,c.90,weak,TGA,NM_001114753.3	NA	NA	NA	NA	NA	NA	NA	NA	GTG	non_canonical_TIS	non_TIS(GCG)_to_non_canonical_TIS(GTG)	TGA	127854355	127815682	127854380	127843223	ATAAGGCCCAGTGCACAGGCCCC	0.515086395996842	weak	c.-25	c.90	1.971e-05	4.41e-05	.	.	.
chr9	127854379	G	C	ENST00000373203.9:reverse	NM_001114753.3	ENG	rs769883395	c.-24C>G	UTR5	uTIS	out_of_frame_(2)	overlapping_6.28%	0.0759878419452888	50/658	153	ENST00000373203.9:reverse,c.-24C>G,26,out_of_frame_(2),AGG,UTR5,non_canonical_TIS,non_TIS(AGC)_to_non_canonical_TIS(AGG),overlapping_6.28%,50[/658](aa),153,127854355,127854381,127843188,127815682,GATAAGGCCCAGGGCACAGGCCC,0.661971828234477,c.-26,c.125,weak,TGA,NM_001114753.3	NA	NA	NA	NA	NA	NA	NA	NA	AGG	non_canonical_TIS	non_TIS(AGC)_to_non_canonical_TIS(AGG)	TGA	127854355	127815682	127854381	127843188	GATAAGGCCCAGGGCACAGGCCC	0.661971828234477	moderate	c.-26	c.125	.	.	.	.	.
chr9	127854375	G	A	ENST00000373203.9:reverse	NM_001114753.3	ENG	.	c.-20C>T	UTR5	uTIS	in_frame	elongated_CDS	1.01063829787234	665/658	1998	ENST00000373203.9:reverse,c.-20C>T,21,in_frame,ATA,UTR5,non_canonical_TIS,non_TIS(ACA)_to_non_canonical_TIS(ATA),elongated_CDS,665[/658](aa),1998,127854355,127854376,127815684,127815682,GGCCCAGCGCATAGGCCCCCACG,0.664788725406467,c.-21,c.1975,weak,TAG,NM_001114753.3	NA	NA	NA	NA	NA	NA	NA	NA	ATA	non_canonical_TIS	non_TIS(ACA)_to_non_canonical_TIS(ATA)	TAG	127854355	127815682	127854376	127815684	GGCCCAGCGCATAGGCCCCCACG	0.664788725406467	moderate	c.-21	c.1975	.	.	.	.	.
chr9	127854375	G	T	ENST00000373203.9:reverse	NM_001114753.3	ENG	.	c.-20C>A	UTR5	uTIS	out_of_frame_(2)	overlapping_6.28%	0.0729483282674772	48/658	147	ENST00000373203.9:reverse,c.-20C>A,20,out_of_frame_(2),AAG,UTR5,non_canonical_TIS,non_TIS(CAG)_to_non_canonical_TIS(AAG),overlapping_6.28%,48[/658](aa),147,127854355,127854375,127843188,127815682,GCCCAGCGCAAAGGCCCCCACGT,0.77165492878784,c.-20,c.125,moderate,TGA,NM_001114753.3	NA	NA	NA	NA	NA	NA	NA	NA	AAG	non_canonical_TIS	non_TIS(CAG)_to_non_canonical_TIS(AAG)	TGA	127854355	127815682	127854375	127843188	GCCCAGCGCAAAGGCCCCCACGT	0.77165492878784	strong	c.-20	c.125	.	.	.	.	.
chr9	127854374	T	A	ENST00000373203.9:reverse	NM_001114753.3	ENG	.	c.-19A>T	UTR5	uTIS	out_of_frame_(2)	overlapping_6.28%	0.0729483282674772	48/658	147	ENST00000373203.9:reverse,c.-19A>T,20,out_of_frame_(2),CTG,UTR5,non_canonical_TIS,non_TIS(CAG)_to_non_canonical_TIS(CTG),overlapping_6.28%,48[/658](aa),147,127854355,127854375,127843188,127815682,GCCCAGCGCACTGGCCCCCACGT,0.77165492878784,c.-20,c.125,moderate,TGA,NM_001114753.3	NA	NA	NA	NA	NA	NA	NA	NA	CTG	non_canonical_TIS	non_TIS(CAG)_to_non_canonical_TIS(CTG)	TGA	127854355	127815682	127854375	127843188	GCCCAGCGCACTGGCCCCCACGT	0.77165492878784	strong	c.-20	c.125	.	.	.	.	.
chr9	127854374	T	C	ENST00000373203.9:reverse	NM_001114753.3	ENG	.	c.-19A>G	UTR5	uTIS	in_frame	elongated_CDS	1.01063829787234	665/658	1998	ENST00000373203.9:reverse,c.-19A>G,21,in_frame,ACG,UTR5,non_canonical_TIS,non_TIS(ACA)_to_non_canonical_TIS(ACG),elongated_CDS,665[/658](aa),1998,127854355,127854376,127815684,127815682,GGCCCAGCGCACGGGCCCCCACG,0.664788725406467,c.-21,c.1975,weak,TAG,NM_001114753.3	NA	NA	NA	NA	NA	NA	NA	NA	ACG	non_canonical_TIS	non_TIS(ACA)_to_non_canonical_TIS(ACG)	TAG	127854355	127815682	127854376	127815684	GGCCCAGCGCACGGGCCCCCACG	0.664788725406467	moderate	c.-21	c.1975	.	.	.	.	.
chr9	127854373	C	A	ENST00000373203.9:reverse	NM_001114753.3	ENG	.	c.-18G>T	UTR5	uTIS	out_of_frame_(1)	overlapping_4.51%	0.0547112462006079	36/658	111	ENST00000373203.9:reverse,c.-18G>T,19,out_of_frame_(1),ATG,UTR5,canonical_TIS,non_canonical_TIS(AGG)_to_canonical_TIS(ATG),overlapping_4.51%,36[/658](aa),111,127854355,127854374,127843223,127815682,CCCAGCGCACATGCCCCCACGTG,0.611091543787245,c.-19,c.90,weak,TGA,NM_001114753.3	NA	NA	NA	NA	NA	NA	NA	NA	ATG	canonical_TIS	non_canonical_TIS(AGG)_to_canonical_TIS(ATG)	TGA	127854355	127815682	127854374	127843223	CCCAGCGCACATGCCCCCACGTG	0.611091543787245	weak	c.-19	c.90	.	.	.	.	.
chr9	127854373	C	G	ENST00000373203.9:reverse	NM_001114753.3	ENG	.	c.-18G>C	UTR5	uTIS	out_of_frame_(1)	overlapping_4.51%	0.0547112462006079	36/658	111	ENST00000373203.9:reverse,c.-18G>C,19,out_of_frame_(1),ACG,UTR5,non_canonical_TIS,non_canonical_TIS(AGG)_to_non_canonical_TIS(ACG),overlapping_4.51%,36[/658](aa),111,127854355,127854374,127843223,127815682,CCCAGCGCACACGCCCCCACGTG,0.611091543787245,c.-19,c.90,weak,TGA,NM_001114753.3	NA	NA	NA	NA	NA	NA	NA	NA	ACG	non_canonical_TIS	non_canonical_TIS(AGG)_to_non_canonical_TIS(ACG)	TGA	127854355	127815682	127854374	127843223	CCCAGCGCACACGCCCCCACGTG	0.611091543787245	weak	c.-19	c.90	.	.	.	.	.
chr9	127854373	C	T	ENST00000373203.9:reverse	NM_001114753.3	ENG	.	c.-18G>A	UTR5	uTIS	out_of_frame_(1)	overlapping_4.51%	0.0547112462006079	36/658	111	ENST00000373203.9:reverse,c.-18G>A,19,out_of_frame_(1),AAG,UTR5,non_canonical_TIS,non_canonical_TIS(AGG)_to_non_canonical_TIS(AAG),overlapping_4.51%,36[/658](aa),111,127854355,127854374,127843223,127815682,CCCAGCGCACAAGCCCCCACGTG,0.611091543787245,c.-19,c.90,weak,TGA,NM_001114753.3	NA	NA	NA	NA	NA	NA	NA	NA	AAG	non_canonical_TIS	non_canonical_TIS(AGG)_to_non_canonical_TIS(AAG)	TGA	127854355	127815682	127854374	127843223	CCCAGCGCACAAGCCCCCACGTG	0.611091543787245	weak	c.-19	c.90	.	.	.	.	.
chr9	127854365	G	A	ENST00000373203.9:reverse	NM_001114753.3	ENG	rs756994701	c.-10C>T	UTR5	uTIS	out_of_frame_(2)	overlapping_6.28%	0.0683890577507599	45/658	138	ENST00000373203.9:reverse,c.-10C>T,11,out_of_frame_(2),ATG,UTR5,canonical_TIS,non_canonical_TIS(ACG)_to_canonical_TIS(ATG),overlapping_6.28%,45[/658](aa),138,127854355,127854366,127843188,127815682,ACAGGCCCCCATGTGGACAGCAT,0.607398596759555,c.-11,c.125,weak,TGA,NM_001114753.3	NA	NA	NA	NA	NA	NA	NA	NA	ATG	canonical_TIS	non_canonical_TIS(ACG)_to_canonical_TIS(ATG)	TGA	127854355	127815682	127854366	127843188	ACAGGCCCCCATGTGGACAGCAT	0.607398596759555	weak	c.-11	c.125	6.57e-06	0.0002	Hereditary_hemorrhagic_telangiectasia|Cardiovascular_phenotype|not_provided	MONDO:MONDO:0019180,MedGen:C0039445,OMIM:PS187300,Orphanet:ORPHA774,SNOMED_CT:21877004|MedGen:CN230736|MedGen:CN517202	Conflicting_interpretations_of_pathogenicity
chr9	127854365	G	C	ENST00000373203.9:reverse	NM_001114753.3	ENG	.	c.-10C>G	UTR5	uTIS	out_of_frame_(2)	overlapping_6.28%	0.0683890577507599	45/658	138	ENST00000373203.9:reverse,c.-10C>G,11,out_of_frame_(2),AGG,UTR5,non_canonical_TIS,non_canonical_TIS(ACG)_to_non_canonical_TIS(AGG),overlapping_6.28%,45[/658](aa),138,127854355,127854366,127843188,127815682,ACAGGCCCCCAGGTGGACAGCAT,0.607398596759555,c.-11,c.125,weak,TGA,NM_001114753.3	NA	NA	NA	NA	NA	NA	NA	NA	AGG	non_canonical_TIS	non_canonical_TIS(ACG)_to_non_canonical_TIS(AGG)	TGA	127854355	127815682	127854366	127843188	ACAGGCCCCCAGGTGGACAGCAT	0.607398596759555	weak	c.-11	c.125	.	.	.	.	.
chr9	127854365	G	T	ENST00000373203.9:reverse	NM_001114753.3	ENG	.	c.-10C>A	UTR5	uTIS	out_of_frame_(2)	overlapping_6.28%	0.0683890577507599	45/658	138	ENST00000373203.9:reverse,c.-10C>A,11,out_of_frame_(2),AAG,UTR5,non_canonical_TIS,non_canonical_TIS(ACG)_to_non_canonical_TIS(AAG),overlapping_6.28%,45[/658](aa),138,127854355,127854366,127843188,127815682,ACAGGCCCCCAAGTGGACAGCAT,0.607398596759555,c.-11,c.125,weak,TGA,NM_001114753.3	NA	NA	NA	NA	NA	NA	NA	NA	AAG	non_canonical_TIS	non_canonical_TIS(ACG)_to_non_canonical_TIS(AAG)	TGA	127854355	127815682	127854366	127843188	ACAGGCCCCCAAGTGGACAGCAT	0.607398596759555	weak	c.-11	c.125	.	.	.	.	.
chr9	127854364	C	A	ENST00000373203.9:reverse	NM_001114753.3	ENG	.	c.-9G>T	UTR5	uTIS	in_frame	elongated_CDS	1.00455927051672	661/658	1986	ENST00000373203.9:reverse,c.-9G>T,9,in_frame,TTG,UTR5,non_canonical_TIS,non_canonical_TIS(GTG)_to_non_canonical_TIS(TTG),elongated_CDS,661[/658](aa),1986,127854355,127854364,127815684,127815682,AGGCCCCCACTTGGACAGCATGG,0.71508639492642,c.-9,c.1975,weak,TAG,NM_001114753.3	NA	NA	NA	NA	NA	NA	NA	NA	TTG	non_canonical_TIS	non_canonical_TIS(GTG)_to_non_canonical_TIS(TTG)	TAG	127854355	127815682	127854364	127815684	AGGCCCCCACTTGGACAGCATGG	0.71508639492642	moderate	c.-9	c.1975	.	.	.	.	.
chr9	127854364	C	G	ENST00000373203.9:reverse	NM_001114753.3	ENG	.	c.-9G>C	UTR5	uTIS	in_frame	elongated_CDS	1.00455927051672	661/658	1986	ENST00000373203.9:reverse,c.-9G>C,9,in_frame,CTG,UTR5,non_canonical_TIS,non_canonical_TIS(GTG)_to_non_canonical_TIS(CTG),elongated_CDS,661[/658](aa),1986,127854355,127854364,127815684,127815682,AGGCCCCCACCTGGACAGCATGG,0.71508639492642,c.-9,c.1975,weak,TAG,NM_001114753.3	NA	NA	NA	NA	NA	NA	NA	NA	CTG	non_canonical_TIS	non_canonical_TIS(GTG)_to_non_canonical_TIS(CTG)	TAG	127854355	127815682	127854364	127815684	AGGCCCCCACCTGGACAGCATGG	0.71508639492642	moderate	c.-9	c.1975	.	.	.	.	.
chr9	127854364	C	T	ENST00000373203.9:reverse	NM_001114753.3	ENG	rs368423516	c.-9G>A	UTR5	uTIS	in_frame	elongated_CDS	1.00455927051672	661/658	1986	ENST00000373203.9:reverse,c.-9G>A,9,in_frame,ATG,UTR5,canonical_TIS,non_canonical_TIS(GTG)_to_canonical_TIS(ATG),elongated_CDS,661[/658](aa),1986,127854355,127854364,127815684,127815682,AGGCCCCCACATGGACAGCATGG,0.71508639492642,c.-9,c.1975,weak,TAG,NM_001114753.3	NA	NA	NA	NA	NA	NA	NA	NA	ATG	canonical_TIS	non_canonical_TIS(GTG)_to_canonical_TIS(ATG)	TAG	127854355	127815682	127854364	127815684	AGGCCCCCACATGGACAGCATGG	0.71508639492642	moderate	c.-9	c.1975	0.0004	0.0007	Telangiectasia,_hereditary_hemorrhagic,_type_1|Hereditary_hemorrhagic_telangiectasia|Cardiovascular_phenotype|not_provided	MONDO:MONDO:0008535,MedGen:C4551861,OMIM:187300|MONDO:MONDO:0019180,MedGen:C0039445,OMIM:PS187300,Orphanet:ORPHA774,SNOMED_CT:21877004|MedGen:CN230736|MedGen:CN517202	Conflicting_interpretations_of_pathogenicity
chr9	127854363	A	T	ENST00000373203.9:reverse	NM_001114753.3	ENG	.	c.-8T>A	UTR5	uTIS	out_of_frame_(2)	overlapping_6.28%	0.0668693009118541	44/658	135	ENST00000373203.9:reverse,c.-8T>A,8,out_of_frame_(2),AGG,UTR5,non_canonical_TIS,non_TIS(TGG)_to_non_canonical_TIS(AGG),overlapping_6.28%,44[/658](aa),135,127854355,127854363,127843188,127815682,GGCCCCCACGAGGACAGCATGGA,0.785739438732295,c.-8,c.125,strong,TGA,NM_001114753.3	NA	NA	NA	NA	NA	NA	NA	NA	AGG	non_canonical_TIS	non_TIS(TGG)_to_non_canonical_TIS(AGG)	TGA	127854355	127815682	127854363	127843188	GGCCCCCACGAGGACAGCATGGA	0.785739438732295	moderate	c.-8	c.125	.	.	.	.	.
chr9	127854362	C	A	ENST00000373203.9:reverse	NM_001114753.3	ENG	.	c.-7G>T	UTR5	uTIS	out_of_frame_(2)	overlapping_6.28%	0.0668693009118541	44/658	135	ENST00000373203.9:reverse,c.-7G>T,8,out_of_frame_(2),TTG,UTR5,non_canonical_TIS,non_TIS(TGG)_to_non_canonical_TIS(TTG),overlapping_6.28%,44[/658](aa),135,127854355,127854363,127843188,127815682,GGCCCCCACGTTGACAGCATGGA,0.785739438732295,c.-8,c.125,strong,TGA,NM_001114753.3	NA	NA	NA	NA	NA	NA	NA	NA	TTG	non_canonical_TIS	non_TIS(TGG)_to_non_canonical_TIS(TTG)	TGA	127854355	127815682	127854363	127843188	GGCCCCCACGTTGACAGCATGGA	0.785739438732295	moderate	c.-8	c.125	.	.	.	.	.
chr9	127854359	G	A	ENST00000373203.9:reverse	NM_001114753.3	ENG	.	c.-4C>T	UTR5	uTIS	out_of_frame_(2)	overlapping_6.28%	0.0653495440729483	43/658	132	ENST00000373203.9:reverse,c.-4C>T,5,out_of_frame_(2),ATA,UTR5,non_canonical_TIS,non_TIS(ACA)_to_non_canonical_TIS(ATA),overlapping_6.28%,43[/658](aa),132,127854355,127854360,127843188,127815682,CCCCACGTGGATAGCATGGACCG,0.613908448987403,c.-5,c.125,weak,TGA,NM_001114753.3	NA	NA	NA	NA	NA	NA	NA	NA	ATA	non_canonical_TIS	non_TIS(ACA)_to_non_canonical_TIS(ATA)	TGA	127854355	127815682	127854360	127843188	CCCCACGTGGATAGCATGGACCG	0.613908448987403	moderate	c.-5	c.125	.	.	.	.	.
chr9	127854359	G	T	ENST00000373203.9:reverse	NM_001114753.3	ENG	.	c.-4C>A	UTR5	uTIS	out_of_frame_(1)	overlapping_4.51%	0.047112462006079	31/658	96	ENST00000373203.9:reverse,c.-4C>A,4,out_of_frame_(1),AAG,UTR5,non_canonical_TIS,non_TIS(CAG)_to_non_canonical_TIS(AAG),overlapping_4.51%,31[/658](aa),96,127854355,127854359,127843223,127815682,CCCACGTGGAAAGCATGGACCGC,0.57147887746459,c.-4,c.90,strong,TGA,NM_001114753.3	NA	NA	NA	NA	NA	NA	NA	NA	AAG	non_canonical_TIS	non_TIS(CAG)_to_non_canonical_TIS(AAG)	TGA	127854355	127815682	127854359	127843223	CCCACGTGGAAAGCATGGACCGC	0.57147887746459	moderate	c.-4	c.90	.	.	.	.	.
chr9	127854358	T	A	ENST00000373203.9:reverse	NM_001114753.3	ENG	.	c.-3A>T	UTR5	uTIS	out_of_frame_(1)	overlapping_4.51%	0.047112462006079	31/658	96	ENST00000373203.9:reverse,c.-3A>T,4,out_of_frame_(1),CTG,UTR5,non_canonical_TIS,non_TIS(CAG)_to_non_canonical_TIS(CTG),overlapping_4.51%,31[/658](aa),96,127854355,127854359,127843223,127815682,CCCACGTGGACTGCATGGACCGC,0.57147887746459,c.-4,c.90,strong,TGA,NM_001114753.3	NA	NA	NA	NA	NA	NA	NA	NA	CTG	non_canonical_TIS	non_TIS(CAG)_to_non_canonical_TIS(CTG)	TGA	127854355	127815682	127854359	127843223	CCCACGTGGACTGCATGGACCGC	0.57147887746459	moderate	c.-4	c.90	.	.	.	.	.
chr9	127854358	T	C	ENST00000373203.9:reverse	NM_001114753.3	ENG	.	c.-3A>G	UTR5	uTIS	out_of_frame_(2)	overlapping_6.28%	0.0653495440729483	43/658	132	ENST00000373203.9:reverse,c.-3A>G,5,out_of_frame_(2),ACG,UTR5,non_canonical_TIS,non_TIS(ACA)_to_non_canonical_TIS(ACG),overlapping_6.28%,43[/658](aa),132,127854355,127854360,127843188,127815682,CCCCACGTGGACGGCATGGACCG,0.613908448987403,c.-5,c.125,weak,TGA,NM_001114753.3	NA	NA	NA	NA	NA	NA	NA	NA	ACG	non_canonical_TIS	non_TIS(ACA)_to_non_canonical_TIS(ACG)	TGA	127854355	127815682	127854360	127843188	CCCCACGTGGACGGCATGGACCG	0.613908448987403	moderate	c.-5	c.125	.	.	.	.	.
chr9	127854357	C	A	ENST00000373203.9:reverse	NM_001114753.3	ENG	.	c.-2G>T	UTR5	uTIS	in_frame	elongated_CDS	1.00151975683891	659/658	1980	ENST00000373203.9:reverse,c.-2G>T,3,in_frame,ATC,UTR5,non_canonical_TIS,non_TIS(AGC)_to_non_canonical_TIS(ATC),elongated_CDS,659[/658](aa),1980,127854355,127854358,127815684,127815682,CCACGTGGACATCATGGACCGCG,0.746302811423031,c.-3,c.1975,strong,TAG,NM_001114753.3	NA	NA	NA	NA	NA	NA	NA	NA	ATC	non_canonical_TIS	non_TIS(AGC)_to_non_canonical_TIS(ATC)	TAG	127854355	127815682	127854358	127815684	CCACGTGGACATCATGGACCGCG	0.746302811423031	moderate	c.-3	c.1975	1.314e-05	.	.	.	.
chr9	127854356	G	C	ENST00000373203.9:reverse	NM_001114753.3	ENG	.	c.-1C>G	UTR5	uTIS	in_frame	elongated_CDS	1.00151975683891	659/658	1980	ENST00000373203.9:reverse,c.-1C>G,3,in_frame,AGG,UTR5,non_canonical_TIS,non_TIS(AGC)_to_non_canonical_TIS(AGG),elongated_CDS,659[/658](aa),1980,127854355,127854358,127815684,127815682,CCACGTGGACAGGATGGACCGCG,0.746302811423031,c.-3,c.1975,strong,TAG,NM_001114753.3	NA	NA	NA	NA	NA	NA	NA	NA	AGG	non_canonical_TIS	non_TIS(AGC)_to_non_canonical_TIS(AGG)	TAG	127854355	127815682	127854358	127815684	CCACGTGGACAGGATGGACCGCG	0.746302811423031	moderate	c.-3	c.1975	.	.	.	.	.
chr9	127854521	A	C	ENST00000373203.9:reverse; ENST00000373203.9:reverse; ENST00000373203.9:reverse; ENST00000373203.9:reverse; ENST00000373203.9:reverse; ENST00000373203.9:reverse; ENST00000373203.9:reverse	NM_001114753.3; NM_001114753.3; NM_001114753.3; NM_001114753.3; NM_001114753.3; NM_001114753.3; NM_001114753.3	ENG	.	c.-166T>G; c.-166T>G; c.-166T>G; c.-166T>G; c.-166T>G; c.-166T>G; c.-166T>G	UTR5	uSTOP	out_of_frame_(1); out_of_frame_(1); out_of_frame_(1); out_of_frame_(1); out_of_frame_(1); out_of_frame_(1); out_of_frame_(1)	not_overlapping; not_overlapping; not_overlapping; not_overlapping; not_overlapping; not_overlapping; not_overlapping	0.129179331306991	82/658; 78/658; 77/658; 76/658; 74/658; 85/658; 71/658	249; 237; 234; 231; 225; 258; 216	NA	NA	NA	ENST00000373203.9:reverse,c.-166T>G,-166,out_of_frame_(1),UTR5,not_overlapping,82[/658](aa),127854635,127854389,249,127854355,127815682,c.-280,c.-34,TAA,NM_001114753.3|ENST00000373203.9:reverse,c.-166T>G,-166,out_of_frame_(1),UTR5,not_overlapping,78[/658](aa),127854623,127854389,237,127854355,127815682,c.-268,c.-34,TAA,NM_001114753.3|ENST00000373203.9:reverse,c.-166T>G,-166,out_of_frame_(1),UTR5,…	NA	NA	NA	NA	NA	NA	NA	NA	TAA; TAA; TAA; TAA; TAA; TAA; TAA	127854355; 127854355; 127854355; 127854355; 127854355; 127854355; 127854355	127815682; 127815682; 127815682; 127815682; 127815682; 127815682; 127815682	127854635; 127854623; 127854620; 127854617; 127854611; 127854644; 127854602	127854389; 127854389; 127854389; 127854389; 127854389; 127854389; 127854389	NA	NA	NA	c.-280; c.-268; c.-265; c.-262; c.-256; c.-289; c.-247	c.-34; c.-34; c.-34; c.-34; c.-34; c.-34; c.-34	.	.	.	.	.
chr9	127854521	A	G	ENST00000373203.9:reverse; ENST00000373203.9:reverse; ENST00000373203.9:reverse; ENST00000373203.9:reverse; ENST00000373203.9:reverse; ENST00000373203.9:reverse; ENST00000373203.9:reverse	NM_001114753.3; NM_001114753.3; NM_001114753.3; NM_001114753.3; NM_001114753.3; NM_001114753.3; NM_001114753.3	ENG	.	c.-166T>C; c.-166T>C; c.-166T>C; c.-166T>C; c.-166T>C; c.-166T>C; c.-166T>C	UTR5	uSTOP	out_of_frame_(1); out_of_frame_(1); out_of_frame_(1); out_of_frame_(1); out_of_frame_(1); out_of_frame_(1); out_of_frame_(1)	not_overlapping; not_overlapping; not_overlapping; not_overlapping; not_overlapping; not_overlapping; not_overlapping	0.129179331306991	82/658; 78/658; 77/658; 76/658; 74/658; 85/658; 71/658	249; 237; 234; 231; 225; 258; 216	NA	NA	NA	ENST00000373203.9:reverse,c.-166T>C,-166,out_of_frame_(1),UTR5,not_overlapping,82[/658](aa),127854635,127854389,249,127854355,127815682,c.-280,c.-34,TAA,NM_001114753.3|ENST00000373203.9:reverse,c.-166T>C,-166,out_of_frame_(1),UTR5,not_overlapping,78[/658](aa),127854623,127854389,237,127854355,127815682,c.-268,c.-34,TAA,NM_001114753.3|ENST00000373203.9:reverse,c.-166T>C,-166,out_of_frame_(1),UTR5,…	NA	NA	NA	NA	NA	NA	NA	NA	TAA; TAA; TAA; TAA; TAA; TAA; TAA	127854355; 127854355; 127854355; 127854355; 127854355; 127854355; 127854355	127815682; 127815682; 127815682; 127815682; 127815682; 127815682; 127815682	127854635; 127854623; 127854620; 127854617; 127854611; 127854644; 127854602	127854389; 127854389; 127854389; 127854389; 127854389; 127854389; 127854389	NA	NA	NA	c.-280; c.-268; c.-265; c.-262; c.-256; c.-289; c.-247	c.-34; c.-34; c.-34; c.-34; c.-34; c.-34; c.-34	.	.	.	.	.
chr9	127854521	A	T	ENST00000373203.9:reverse; ENST00000373203.9:reverse; ENST00000373203.9:reverse; ENST00000373203.9:reverse; ENST00000373203.9:reverse; ENST00000373203.9:reverse; ENST00000373203.9:reverse	NM_001114753.3; NM_001114753.3; NM_001114753.3; NM_001114753.3; NM_001114753.3; NM_001114753.3; NM_001114753.3	ENG	.	c.-166T>A; c.-166T>A; c.-166T>A; c.-166T>A; c.-166T>A; c.-166T>A; c.-166T>A	UTR5	uSTOP	out_of_frame_(1); out_of_frame_(1); out_of_frame_(1); out_of_frame_(1); out_of_frame_(1); out_of_frame_(1); out_of_frame_(1)	not_overlapping; not_overlapping; not_overlapping; not_overlapping; not_overlapping; not_overlapping; not_overlapping	0.129179331306991	82/658; 78/658; 77/658; 76/658; 74/658; 85/658; 71/658	249; 237; 234; 231; 225; 258; 216	NA	NA	NA	ENST00000373203.9:reverse,c.-166T>A,-166,out_of_frame_(1),UTR5,not_overlapping,82[/658](aa),127854635,127854389,249,127854355,127815682,c.-280,c.-34,TAA,NM_001114753.3|ENST00000373203.9:reverse,c.-166T>A,-166,out_of_frame_(1),UTR5,not_overlapping,78[/658](aa),127854623,127854389,237,127854355,127815682,c.-268,c.-34,TAA,NM_001114753.3|ENST00000373203.9:reverse,c.-166T>A,-166,out_of_frame_(1),UTR5,…	NA	NA	NA	NA	NA	NA	NA	NA	TAA; TAA; TAA; TAA; TAA; TAA; TAA	127854355; 127854355; 127854355; 127854355; 127854355; 127854355; 127854355	127815682; 127815682; 127815682; 127815682; 127815682; 127815682; 127815682	127854635; 127854623; 127854620; 127854617; 127854611; 127854644; 127854602	127854389; 127854389; 127854389; 127854389; 127854389; 127854389; 127854389	NA	NA	NA	c.-280; c.-268; c.-265; c.-262; c.-256; c.-289; c.-247	c.-34; c.-34; c.-34; c.-34; c.-34; c.-34; c.-34	.	.	.	.	.
chr9	127854520	C	A	ENST00000373203.9:reverse; ENST00000373203.9:reverse; ENST00000373203.9:reverse; ENST00000373203.9:reverse; ENST00000373203.9:reverse; ENST00000373203.9:reverse; ENST00000373203.9:reverse	NM_001114753.3; NM_001114753.3; NM_001114753.3; NM_001114753.3; NM_001114753.3; NM_001114753.3; NM_001114753.3	ENG	.	c.-165G>T; c.-165G>T; c.-165G>T; c.-165G>T; c.-165G>T; c.-165G>T; c.-165G>T	UTR5	uSTOP	out_of_frame_(1); out_of_frame_(1); out_of_frame_(1); out_of_frame_(1); out_of_frame_(1); out_of_frame_(1); out_of_frame_(1)	not_overlapping; not_overlapping; not_overlapping; not_overlapping; not_overlapping; not_overlapping; not_overlapping	0.129179331306991	82/658; 78/658; 77/658; 76/658; 74/658; 85/658; 71/658	249; 237; 234; 231; 225; 258; 216	NA	NA	NA	ENST00000373203.9:reverse,c.-165G>T,-166,out_of_frame_(1),UTR5,not_overlapping,82[/658](aa),127854635,127854389,249,127854355,127815682,c.-280,c.-34,TAA,NM_001114753.3|ENST00000373203.9:reverse,c.-165G>T,-166,out_of_frame_(1),UTR5,not_overlapping,78[/658](aa),127854623,127854389,237,127854355,127815682,c.-268,c.-34,TAA,NM_001114753.3|ENST00000373203.9:reverse,c.-165G>T,-166,out_of_frame_(1),UTR5,…	NA	NA	NA	NA	NA	NA	NA	NA	TAA; TAA; TAA; TAA; TAA; TAA; TAA	127854355; 127854355; 127854355; 127854355; 127854355; 127854355; 127854355	127815682; 127815682; 127815682; 127815682; 127815682; 127815682; 127815682	127854635; 127854623; 127854620; 127854617; 127854611; 127854644; 127854602	127854389; 127854389; 127854389; 127854389; 127854389; 127854389; 127854389	NA	NA	NA	c.-280; c.-268; c.-265; c.-262; c.-256; c.-289; c.-247	c.-34; c.-34; c.-34; c.-34; c.-34; c.-34; c.-34	.	.	.	.	.
chr9	127854520	C	G	ENST00000373203.9:reverse; ENST00000373203.9:reverse; ENST00000373203.9:reverse; ENST00000373203.9:reverse; ENST00000373203.9:reverse; ENST00000373203.9:reverse; ENST00000373203.9:reverse	NM_001114753.3; NM_001114753.3; NM_001114753.3; NM_001114753.3; NM_001114753.3; NM_001114753.3; NM_001114753.3	ENG	.	c.-165G>C; c.-165G>C; c.-165G>C; c.-165G>C; c.-165G>C; c.-165G>C; c.-165G>C	UTR5	uSTOP	out_of_frame_(1); out_of_frame_(1); out_of_frame_(1); out_of_frame_(1); out_of_frame_(1); out_of_frame_(1); out_of_frame_(1)	not_overlapping; not_overlapping; not_overlapping; not_overlapping; not_overlapping; not_overlapping; not_overlapping	0.129179331306991	82/658; 78/658; 77/658; 76/658; 74/658; 85/658; 71/658	249; 237; 234; 231; 225; 258; 216	NA	NA	NA	ENST00000373203.9:reverse,c.-165G>C,-166,out_of_frame_(1),UTR5,not_overlapping,82[/658](aa),127854635,127854389,249,127854355,127815682,c.-280,c.-34,TAA,NM_001114753.3|ENST00000373203.9:reverse,c.-165G>C,-166,out_of_frame_(1),UTR5,not_overlapping,78[/658](aa),127854623,127854389,237,127854355,127815682,c.-268,c.-34,TAA,NM_001114753.3|ENST00000373203.9:reverse,c.-165G>C,-166,out_of_frame_(1),UTR5,…	NA	NA	NA	NA	NA	NA	NA	NA	TAA; TAA; TAA; TAA; TAA; TAA; TAA	127854355; 127854355; 127854355; 127854355; 127854355; 127854355; 127854355	127815682; 127815682; 127815682; 127815682; 127815682; 127815682; 127815682	127854635; 127854623; 127854620; 127854617; 127854611; 127854644; 127854602	127854389; 127854389; 127854389; 127854389; 127854389; 127854389; 127854389	NA	NA	NA	c.-280; c.-268; c.-265; c.-262; c.-256; c.-289; c.-247	c.-34; c.-34; c.-34; c.-34; c.-34; c.-34; c.-34	.	.	.	.	.
chr9	127854519	T	A	ENST00000373203.9:reverse; ENST00000373203.9:reverse; ENST00000373203.9:reverse; ENST00000373203.9:reverse; ENST00000373203.9:reverse; ENST00000373203.9:reverse; ENST00000373203.9:reverse	NM_001114753.3; NM_001114753.3; NM_001114753.3; NM_001114753.3; NM_001114753.3; NM_001114753.3; NM_001114753.3	ENG	.	c.-164A>T; c.-164A>T; c.-164A>T; c.-164A>T; c.-164A>T; c.-164A>T; c.-164A>T	UTR5	uSTOP	out_of_frame_(1); out_of_frame_(1); out_of_frame_(1); out_of_frame_(1); out_of_frame_(1); out_of_frame_(1); out_of_frame_(1)	not_overlapping; not_overlapping; not_overlapping; not_overlapping; not_overlapping; not_overlapping; not_overlapping	0.129179331306991	82/658; 78/658; 77/658; 76/658; 74/658; 85/658; 71/658	249; 237; 234; 231; 225; 258; 216	NA	NA	NA	ENST00000373203.9:reverse,c.-164A>T,-166,out_of_frame_(1),UTR5,not_overlapping,82[/658](aa),127854635,127854389,249,127854355,127815682,c.-280,c.-34,TAA,NM_001114753.3|ENST00000373203.9:reverse,c.-164A>T,-166,out_of_frame_(1),UTR5,not_overlapping,78[/658](aa),127854623,127854389,237,127854355,127815682,c.-268,c.-34,TAA,NM_001114753.3|ENST00000373203.9:reverse,c.-164A>T,-166,out_of_frame_(1),UTR5,…	NA	NA	NA	NA	NA	NA	NA	NA	TAA; TAA; TAA; TAA; TAA; TAA; TAA	127854355; 127854355; 127854355; 127854355; 127854355; 127854355; 127854355	127815682; 127815682; 127815682; 127815682; 127815682; 127815682; 127815682	127854635; 127854623; 127854620; 127854617; 127854611; 127854644; 127854602	127854389; 127854389; 127854389; 127854389; 127854389; 127854389; 127854389	NA	NA	NA	c.-280; c.-268; c.-265; c.-262; c.-256; c.-289; c.-247	c.-34; c.-34; c.-34; c.-34; c.-34; c.-34; c.-34	.	.	.	.	.
chr9	127854519	T	C	ENST00000373203.9:reverse; ENST00000373203.9:reverse; ENST00000373203.9:reverse; ENST00000373203.9:reverse; ENST00000373203.9:reverse; ENST00000373203.9:reverse; ENST00000373203.9:reverse	NM_001114753.3; NM_001114753.3; NM_001114753.3; NM_001114753.3; NM_001114753.3; NM_001114753.3; NM_001114753.3	ENG	.	c.-164A>G; c.-164A>G; c.-164A>G; c.-164A>G; c.-164A>G; c.-164A>G; c.-164A>G	UTR5	uSTOP	out_of_frame_(1); out_of_frame_(1); out_of_frame_(1); out_of_frame_(1); out_of_frame_(1); out_of_frame_(1); out_of_frame_(1)	not_overlapping; not_overlapping; not_overlapping; not_overlapping; not_overlapping; not_overlapping; not_overlapping	0.129179331306991	82/658; 78/658; 77/658; 76/658; 74/658; 85/658; 71/658	249; 237; 234; 231; 225; 258; 216	NA	NA	NA	ENST00000373203.9:reverse,c.-164A>G,-166,out_of_frame_(1),UTR5,not_overlapping,82[/658](aa),127854635,127854389,249,127854355,127815682,c.-280,c.-34,TAA,NM_001114753.3|ENST00000373203.9:reverse,c.-164A>G,-166,out_of_frame_(1),UTR5,not_overlapping,78[/658](aa),127854623,127854389,237,127854355,127815682,c.-268,c.-34,TAA,NM_001114753.3|ENST00000373203.9:reverse,c.-164A>G,-166,out_of_frame_(1),UTR5,…	NA	NA	NA	NA	NA	NA	NA	NA	TAA; TAA; TAA; TAA; TAA; TAA; TAA	127854355; 127854355; 127854355; 127854355; 127854355; 127854355; 127854355	127815682; 127815682; 127815682; 127815682; 127815682; 127815682; 127815682	127854635; 127854623; 127854620; 127854617; 127854611; 127854644; 127854602	127854389; 127854389; 127854389; 127854389; 127854389; 127854389; 127854389	NA	NA	NA	c.-280; c.-268; c.-265; c.-262; c.-256; c.-289; c.-247	c.-34; c.-34; c.-34; c.-34; c.-34; c.-34; c.-34	.	.	.	.	.
chr9	127854519	T	G	ENST00000373203.9:reverse; ENST00000373203.9:reverse; ENST00000373203.9:reverse; ENST00000373203.9:reverse; ENST00000373203.9:reverse; ENST00000373203.9:reverse; ENST00000373203.9:reverse	NM_001114753.3; NM_001114753.3; NM_001114753.3; NM_001114753.3; NM_001114753.3; NM_001114753.3; NM_001114753.3	ENG	.	c.-164A>C; c.-164A>C; c.-164A>C; c.-164A>C; c.-164A>C; c.-164A>C; c.-164A>C	UTR5	uSTOP	out_of_frame_(1); out_of_frame_(1); out_of_frame_(1); out_of_frame_(1); out_of_frame_(1); out_of_frame_(1); out_of_frame_(1)	not_overlapping; not_overlapping; not_overlapping; not_overlapping; not_overlapping; not_overlapping; not_overlapping	0.129179331306991	82/658; 78/658; 77/658; 76/658; 74/658; 85/658; 71/658	249; 237; 234; 231; 225; 258; 216	NA	NA	NA	ENST00000373203.9:reverse,c.-164A>C,-166,out_of_frame_(1),UTR5,not_overlapping,82[/658](aa),127854635,127854389,249,127854355,127815682,c.-280,c.-34,TAA,NM_001114753.3|ENST00000373203.9:reverse,c.-164A>C,-166,out_of_frame_(1),UTR5,not_overlapping,78[/658](aa),127854623,127854389,237,127854355,127815682,c.-268,c.-34,TAA,NM_001114753.3|ENST00000373203.9:reverse,c.-164A>C,-166,out_of_frame_(1),UTR5,…	NA	NA	NA	NA	NA	NA	NA	NA	TAA; TAA; TAA; TAA; TAA; TAA; TAA	127854355; 127854355; 127854355; 127854355; 127854355; 127854355; 127854355	127815682; 127815682; 127815682; 127815682; 127815682; 127815682; 127815682	127854635; 127854623; 127854620; 127854617; 127854611; 127854644; 127854602	127854389; 127854389; 127854389; 127854389; 127854389; 127854389; 127854389	NA	NA	NA	c.-280; c.-268; c.-265; c.-262; c.-256; c.-289; c.-247	c.-34; c.-34; c.-34; c.-34; c.-34; c.-34; c.-34	.	.	.	.	.
chr9	127854389	A	C	ENST00000373203.9:reverse; ENST00000373203.9:reverse; ENST00000373203.9:reverse; ENST00000373203.9:reverse; ENST00000373203.9:reverse	NM_001114753.3; NM_001114753.3; NM_001114753.3; NM_001114753.3; NM_001114753.3	ENG	.	c.-34T>G; c.-34T>G; c.-34T>G; c.-34T>G; c.-34T>G	UTR5	uSTOP	out_of_frame_(1); out_of_frame_(1); out_of_frame_(1); out_of_frame_(1); out_of_frame_(1)	overlapping_4.51%; overlapping_4.51%; overlapping_4.51%; overlapping_4.51%; overlapping_4.51%	0.117021276595745	76/658; 66/658; 47/658; 45/658; 77/658	231; 201; 144; 138; 234	NA	NA	NA	ENST00000373203.9:reverse,c.-34T>G,-34,out_of_frame_(1),UTR5,overlapping_4.51%,76[/658](aa),127854494,127843223,231,127854355,127815682,c.-139,c.90,TGA,NM_001114753.3|ENST00000373203.9:reverse,c.-34T>G,-34,out_of_frame_(1),UTR5,overlapping_4.51%,66[/658](aa),127854464,127843223,201,127854355,127815682,c.-109,c.90,TGA,NM_001114753.3|ENST00000373203.9:reverse,c.-34T>G,-34,out_of_frame_(1),UTR5,over…	NA	NA	NA	NA	NA	NA	NA	NA	TGA; TGA; TGA; TGA; TGA	127854355; 127854355; 127854355; 127854355; 127854355	127815682; 127815682; 127815682; 127815682; 127815682	127854494; 127854464; 127854407; 127854401; 127854497	127843223; 127843223; 127843223; 127843223; 127843223	NA	NA	NA	c.-139; c.-109; c.-52; c.-46; c.-142	c.90; c.90; c.90; c.90; c.90	.	.	.	.	.
chr9	127854389	A	G	ENST00000373203.9:reverse; ENST00000373203.9:reverse; ENST00000373203.9:reverse; ENST00000373203.9:reverse; ENST00000373203.9:reverse	NM_001114753.3; NM_001114753.3; NM_001114753.3; NM_001114753.3; NM_001114753.3	ENG	.	c.-34T>C; c.-34T>C; c.-34T>C; c.-34T>C; c.-34T>C	UTR5	uSTOP	out_of_frame_(1); out_of_frame_(1); out_of_frame_(1); out_of_frame_(1); out_of_frame_(1)	overlapping_4.51%; overlapping_4.51%; overlapping_4.51%; overlapping_4.51%; overlapping_4.51%	0.117021276595745	76/658; 66/658; 47/658; 45/658; 77/658	231; 201; 144; 138; 234	NA	NA	NA	ENST00000373203.9:reverse,c.-34T>C,-34,out_of_frame_(1),UTR5,overlapping_4.51%,76[/658](aa),127854494,127843223,231,127854355,127815682,c.-139,c.90,TGA,NM_001114753.3|ENST00000373203.9:reverse,c.-34T>C,-34,out_of_frame_(1),UTR5,overlapping_4.51%,66[/658](aa),127854464,127843223,201,127854355,127815682,c.-109,c.90,TGA,NM_001114753.3|ENST00000373203.9:reverse,c.-34T>C,-34,out_of_frame_(1),UTR5,over…	NA	NA	NA	NA	NA	NA	NA	NA	TGA; TGA; TGA; TGA; TGA	127854355; 127854355; 127854355; 127854355; 127854355	127815682; 127815682; 127815682; 127815682; 127815682	127854494; 127854464; 127854407; 127854401; 127854497	127843223; 127843223; 127843223; 127843223; 127843223	NA	NA	NA	c.-139; c.-109; c.-52; c.-46; c.-142	c.90; c.90; c.90; c.90; c.90	.	.	.	.	.
chr9	127854389	A	T	ENST00000373203.9:reverse; ENST00000373203.9:reverse; ENST00000373203.9:reverse; ENST00000373203.9:reverse; ENST00000373203.9:reverse	NM_001114753.3; NM_001114753.3; NM_001114753.3; NM_001114753.3; NM_001114753.3	ENG	.	c.-34T>A; c.-34T>A; c.-34T>A; c.-34T>A; c.-34T>A	UTR5	uSTOP	out_of_frame_(1); out_of_frame_(1); out_of_frame_(1); out_of_frame_(1); out_of_frame_(1)	overlapping_4.51%; overlapping_4.51%; overlapping_4.51%; overlapping_4.51%; overlapping_4.51%	0.117021276595745	76/658; 66/658; 47/658; 45/658; 77/658	231; 201; 144; 138; 234	NA	NA	NA	ENST00000373203.9:reverse,c.-34T>A,-34,out_of_frame_(1),UTR5,overlapping_4.51%,76[/658](aa),127854494,127843223,231,127854355,127815682,c.-139,c.90,TGA,NM_001114753.3|ENST00000373203.9:reverse,c.-34T>A,-34,out_of_frame_(1),UTR5,overlapping_4.51%,66[/658](aa),127854464,127843223,201,127854355,127815682,c.-109,c.90,TGA,NM_001114753.3|ENST00000373203.9:reverse,c.-34T>A,-34,out_of_frame_(1),UTR5,over…	NA	NA	NA	NA	NA	NA	NA	NA	TGA; TGA; TGA; TGA; TGA	127854355; 127854355; 127854355; 127854355; 127854355	127815682; 127815682; 127815682; 127815682; 127815682	127854494; 127854464; 127854407; 127854401; 127854497	127843223; 127843223; 127843223; 127843223; 127843223	NA	NA	NA	c.-139; c.-109; c.-52; c.-46; c.-142	c.90; c.90; c.90; c.90; c.90	.	.	.	.	.
chr9	127854388	T	A	ENST00000373203.9:reverse; ENST00000373203.9:reverse; ENST00000373203.9:reverse; ENST00000373203.9:reverse; ENST00000373203.9:reverse	NM_001114753.3; NM_001114753.3; NM_001114753.3; NM_001114753.3; NM_001114753.3	ENG	.	c.-33A>T; c.-33A>T; c.-33A>T; c.-33A>T; c.-33A>T	UTR5	uSTOP	out_of_frame_(1); out_of_frame_(1); out_of_frame_(1); out_of_frame_(1); out_of_frame_(1)	overlapping_4.51%; overlapping_4.51%; overlapping_4.51%; overlapping_4.51%; overlapping_4.51%	0.117021276595745	76/658; 66/658; 47/658; 45/658; 77/658	231; 201; 144; 138; 234	NA	NA	NA	ENST00000373203.9:reverse,c.-33A>T,-34,out_of_frame_(1),UTR5,overlapping_4.51%,76[/658](aa),127854494,127843223,231,127854355,127815682,c.-139,c.90,TGA,NM_001114753.3|ENST00000373203.9:reverse,c.-33A>T,-34,out_of_frame_(1),UTR5,overlapping_4.51%,66[/658](aa),127854464,127843223,201,127854355,127815682,c.-109,c.90,TGA,NM_001114753.3|ENST00000373203.9:reverse,c.-33A>T,-34,out_of_frame_(1),UTR5,over…	NA	NA	NA	NA	NA	NA	NA	NA	TGA; TGA; TGA; TGA; TGA	127854355; 127854355; 127854355; 127854355; 127854355	127815682; 127815682; 127815682; 127815682; 127815682	127854494; 127854464; 127854407; 127854401; 127854497	127843223; 127843223; 127843223; 127843223; 127843223	NA	NA	NA	c.-139; c.-109; c.-52; c.-46; c.-142	c.90; c.90; c.90; c.90; c.90	.	.	.	.	.
chr9	127854388	T	G	ENST00000373203.9:reverse; ENST00000373203.9:reverse; ENST00000373203.9:reverse; ENST00000373203.9:reverse; ENST00000373203.9:reverse	NM_001114753.3; NM_001114753.3; NM_001114753.3; NM_001114753.3; NM_001114753.3	ENG	.	c.-33A>C; c.-33A>C; c.-33A>C; c.-33A>C; c.-33A>C	UTR5	uSTOP	out_of_frame_(1); out_of_frame_(1); out_of_frame_(1); out_of_frame_(1); out_of_frame_(1)	overlapping_4.51%; overlapping_4.51%; overlapping_4.51%; overlapping_4.51%; overlapping_4.51%	0.117021276595745	76/658; 66/658; 47/658; 45/658; 77/658	231; 201; 144; 138; 234	NA	NA	NA	ENST00000373203.9:reverse,c.-33A>C,-34,out_of_frame_(1),UTR5,overlapping_4.51%,76[/658](aa),127854494,127843223,231,127854355,127815682,c.-139,c.90,TGA,NM_001114753.3|ENST00000373203.9:reverse,c.-33A>C,-34,out_of_frame_(1),UTR5,overlapping_4.51%,66[/658](aa),127854464,127843223,201,127854355,127815682,c.-109,c.90,TGA,NM_001114753.3|ENST00000373203.9:reverse,c.-33A>C,-34,out_of_frame_(1),UTR5,over…	NA	NA	NA	NA	NA	NA	NA	NA	TGA; TGA; TGA; TGA; TGA	127854355; 127854355; 127854355; 127854355; 127854355	127815682; 127815682; 127815682; 127815682; 127815682	127854494; 127854464; 127854407; 127854401; 127854497	127843223; 127843223; 127843223; 127843223; 127843223	NA	NA	NA	c.-139; c.-109; c.-52; c.-46; c.-142	c.90; c.90; c.90; c.90; c.90	.	.	.	.	.
chr9	127854387	T	A	ENST00000373203.9:reverse; ENST00000373203.9:reverse; ENST00000373203.9:reverse; ENST00000373203.9:reverse; ENST00000373203.9:reverse	NM_001114753.3; NM_001114753.3; NM_001114753.3; NM_001114753.3; NM_001114753.3	ENG	.	c.-32A>T; c.-32A>T; c.-32A>T; c.-32A>T; c.-32A>T	UTR5	uSTOP	out_of_frame_(1); out_of_frame_(1); out_of_frame_(1); out_of_frame_(1); out_of_frame_(1)	overlapping_4.51%; overlapping_4.51%; overlapping_4.51%; overlapping_4.51%; overlapping_4.51%	0.117021276595745	76/658; 66/658; 47/658; 45/658; 77/658	231; 201; 144; 138; 234	NA	NA	NA	ENST00000373203.9:reverse,c.-32A>T,-34,out_of_frame_(1),UTR5,overlapping_4.51%,76[/658](aa),127854494,127843223,231,127854355,127815682,c.-139,c.90,TGA,NM_001114753.3|ENST00000373203.9:reverse,c.-32A>T,-34,out_of_frame_(1),UTR5,overlapping_4.51%,66[/658](aa),127854464,127843223,201,127854355,127815682,c.-109,c.90,TGA,NM_001114753.3|ENST00000373203.9:reverse,c.-32A>T,-34,out_of_frame_(1),UTR5,over…	NA	NA	NA	NA	NA	NA	NA	NA	TGA; TGA; TGA; TGA; TGA	127854355; 127854355; 127854355; 127854355; 127854355	127815682; 127815682; 127815682; 127815682; 127815682	127854494; 127854464; 127854407; 127854401; 127854497	127843223; 127843223; 127843223; 127843223; 127843223	NA	NA	NA	c.-139; c.-109; c.-52; c.-46; c.-142	c.90; c.90; c.90; c.90; c.90	.	.	.	.	.
chr9	127854387	T	G	ENST00000373203.9:reverse; ENST00000373203.9:reverse; ENST00000373203.9:reverse; ENST00000373203.9:reverse; ENST00000373203.9:reverse	NM_001114753.3; NM_001114753.3; NM_001114753.3; NM_001114753.3; NM_001114753.3	ENG	.	c.-32A>C; c.-32A>C; c.-32A>C; c.-32A>C; c.-32A>C	UTR5	uSTOP	out_of_frame_(1); out_of_frame_(1); out_of_frame_(1); out_of_frame_(1); out_of_frame_(1)	overlapping_4.51%; overlapping_4.51%; overlapping_4.51%; overlapping_4.51%; overlapping_4.51%	0.117021276595745	76/658; 66/658; 47/658; 45/658; 77/658	231; 201; 144; 138; 234	NA	NA	NA	ENST00000373203.9:reverse,c.-32A>C,-34,out_of_frame_(1),UTR5,overlapping_4.51%,76[/658](aa),127854494,127843223,231,127854355,127815682,c.-139,c.90,TGA,NM_001114753.3|ENST00000373203.9:reverse,c.-32A>C,-34,out_of_frame_(1),UTR5,overlapping_4.51%,66[/658](aa),127854464,127843223,201,127854355,127815682,c.-109,c.90,TGA,NM_001114753.3|ENST00000373203.9:reverse,c.-32A>C,-34,out_of_frame_(1),UTR5,over…	NA	NA	NA	NA	NA	NA	NA	NA	TGA; TGA; TGA; TGA; TGA	127854355; 127854355; 127854355; 127854355; 127854355	127815682; 127815682; 127815682; 127815682; 127815682	127854494; 127854464; 127854407; 127854401; 127854497	127843223; 127843223; 127843223; 127843223; 127843223	NA	NA	NA	c.-139; c.-109; c.-52; c.-46; c.-142	c.90; c.90; c.90; c.90; c.90	.	.	.	.	.
chr9	127854652	G	A	ENST00000373203.9:reverse	NM_001114753.3	ENG	.	c.-297C>T	UTR5	new_uSTOP	in_frame	not_overlapping	0.00303951367781155	2/658	9	NA	NA	NA	NA	NA	NA	ENST00000373203.9:reverse,c.-297C>T,297,in_frame,UTR5,not_overlapping,2[/658](aa),127854658,127854652,9,127854355,127815682,c.-303,c.-297,TAG,NM_001114753.3	NA	NA	NA	NA	NA	TAG	127854355	127815682	127854658	127854652	NA	NA	NA	c.-303	c.-297	.	.	.	.	.
chr9	127854645	G	C	ENST00000373203.9:reverse	NM_001114753.3	ENG	.	c.-290C>G	UTR5	new_uSTOP	in_frame	not_overlapping	0.0060790273556231	4/658	15	NA	NA	NA	NA	NA	NA	ENST00000373203.9:reverse,c.-290C>G,291,in_frame,UTR5,not_overlapping,4[/658](aa),127854658,127854646,15,127854355,127815682,c.-303,c.-291,TGA,NM_001114753.3	NA	NA	NA	NA	NA	TGA	127854355	127815682	127854658	127854646	NA	NA	NA	c.-303	c.-291	.	.	.	.	.
chr9	127854645	G	T	ENST00000373203.9:reverse	NM_001114753.3	ENG	.	c.-290C>A	UTR5	new_uSTOP	in_frame	not_overlapping	0.0060790273556231	4/658	15	NA	NA	NA	NA	NA	NA	ENST00000373203.9:reverse,c.-290C>A,291,in_frame,UTR5,not_overlapping,4[/658](aa),127854658,127854646,15,127854355,127815682,c.-303,c.-291,TAA,NM_001114753.3	NA	NA	NA	NA	NA	TAA	127854355	127815682	127854658	127854646	NA	NA	NA	c.-303	c.-291	.	.	.	.	.
chr9	127854639	G	T	ENST00000373203.9:reverse	NM_001114753.3	ENG	.	c.-284C>A	UTR5	new_uSTOP	out_of_frame_(1)	not_overlapping	0.00151975683890578	1/658	6	NA	NA	NA	NA	NA	NA	ENST00000373203.9:reverse,c.-284C>A,286,out_of_frame_(1),UTR5,not_overlapping,1[/658](aa),127854644,127854641,6,127854355,127815682,c.-289,c.-286,TGA,NM_001114753.3	NA	NA	NA	NA	NA	TGA	127854355	127815682	127854644	127854641	NA	NA	NA	c.-289	c.-286	6.569e-06	6.544e-05	.	.	.
chr9	127854633	C	T	ENST00000373203.9:reverse	NM_001114753.3	ENG	.	c.-278G>A	UTR5	new_uSTOP	in_frame	not_overlapping	0.0121580547112462	8/658	27	NA	NA	NA	NA	NA	NA	ENST00000373203.9:reverse,c.-278G>A,279,in_frame,UTR5,not_overlapping,8[/658](aa),127854658,127854634,27,127854355,127815682,c.-303,c.-279,TAG,NM_001114753.3	NA	NA	NA	NA	NA	TAG	127854355	127815682	127854658	127854634	NA	NA	NA	c.-303	c.-279	.	.	.	.	.
chr9	127854632	C	T	ENST00000373203.9:reverse	NM_001114753.3	ENG	.	c.-277G>A	UTR5	new_uSTOP	in_frame	not_overlapping	0.0121580547112462	8/658	27	NA	NA	NA	NA	NA	NA	ENST00000373203.9:reverse,c.-277G>A,279,in_frame,UTR5,not_overlapping,8[/658](aa),127854658,127854634,27,127854355,127815682,c.-303,c.-279,TGA,NM_001114753.3	NA	NA	NA	NA	NA	TGA	127854355	127815682	127854658	127854634	NA	NA	NA	c.-303	c.-279	.	.	.	.	.
chr9	127854628	G	A	ENST00000373203.9:reverse	NM_001114753.3	ENG	.	c.-273C>T	UTR5	new_uSTOP	in_frame	not_overlapping	0.0151975683890578	10/658	33	NA	NA	NA	NA	NA	NA	ENST00000373203.9:reverse,c.-273C>T,273,in_frame,UTR5,not_overlapping,10[/658](aa),127854658,127854628,33,127854355,127815682,c.-303,c.-273,TAG,NM_001114753.3	NA	NA	NA	NA	NA	TAG	127854355	127815682	127854658	127854628	NA	NA	NA	c.-303	c.-273	.	.	.	.	.
chr9	127854626	C	A	ENST00000373203.9:reverse; ENST00000373203.9:reverse	NM_001114753.3; NM_001114753.3	ENG	.	c.-271G>T; c.-271G>T	UTR5	new_uSTOP	out_of_frame_(1); out_of_frame_(1)	not_overlapping; not_overlapping	0.00911854103343465	6/658; 3/658	21; 12	NA	NA	NA	NA	NA	NA	ENST00000373203.9:reverse,c.-271G>T,271,out_of_frame_(1),UTR5,not_overlapping,6[/658](aa),127854644,127854626,21,127854355,127815682,c.-289,c.-271,TGA,NM_001114753.3|ENST00000373203.9:reverse,c.-271G>T,271,out_of_frame_(1),UTR5,not_overlapping,3[/658](aa),127854635,127854626,12,127854355,127815682,c.-280,c.-271,TGA,NM_001114753.3	NA	NA	NA	NA	NA	TGA; TGA	127854355; 127854355	127815682; 127815682	127854644; 127854635	127854626; 127854626	NA	NA	NA	c.-289; c.-280	c.-271; c.-271	.	.	.	.	.
chr9	127854620	G	T	ENST00000373203.9:reverse	NM_001114753.3	ENG	.	c.-265C>A	UTR5	new_uSTOP	in_frame	not_overlapping	0.0182370820668693	12/658	39	NA	NA	NA	NA	NA	NA	ENST00000373203.9:reverse,c.-265C>A,267,in_frame,UTR5,not_overlapping,12[/658](aa),127854658,127854622,39,127854355,127815682,c.-303,c.-267,TGA,NM_001114753.3	NA	NA	NA	NA	NA	TGA	127854355	127815682	127854658	127854622	NA	NA	NA	c.-303	c.-267	.	.	.	.	.
chr9	127854617	G	T	ENST00000373203.9:reverse	NM_001114753.3	ENG	.	c.-262C>A	UTR5	new_uSTOP	in_frame	not_overlapping	0.0197568389057751	13/658	42	NA	NA	NA	NA	NA	NA	ENST00000373203.9:reverse,c.-262C>A,264,in_frame,UTR5,not_overlapping,13[/658](aa),127854658,127854619,42,127854355,127815682,c.-303,c.-264,TGA,NM_001114753.3	NA	NA	NA	NA	NA	TGA	127854355	127815682	127854658	127854619	NA	NA	NA	c.-303	c.-264	.	.	.	.	.
chr9	127854614	A	T	ENST00000373203.9:reverse	NM_001114753.3	ENG	.	c.-259T>A	UTR5	new_uSTOP	in_frame	not_overlapping	0.0212765957446809	14/658	45	NA	NA	NA	NA	NA	NA	ENST00000373203.9:reverse,c.-259T>A,261,in_frame,UTR5,not_overlapping,14[/658](aa),127854658,127854616,45,127854355,127815682,c.-303,c.-261,TGA,NM_001114753.3	NA	NA	NA	NA	NA	TGA	127854355	127815682	127854658	127854616	NA	NA	NA	c.-303	c.-261	.	.	.	.	.
chr9	127854613	G	C	ENST00000373203.9:reverse; ENST00000373203.9:reverse; ENST00000373203.9:reverse; ENST00000373203.9:reverse; ENST00000373203.9:reverse	NM_001114753.3; NM_001114753.3; NM_001114753.3; NM_001114753.3; NM_001114753.3	ENG	.	c.-258C>G; c.-258C>G; c.-258C>G; c.-258C>G; c.-258C>G	UTR5	new_uSTOP	out_of_frame_(1); out_of_frame_(1); out_of_frame_(1); out_of_frame_(1); out_of_frame_(1)	not_overlapping; not_overlapping; not_overlapping; not_overlapping; not_overlapping	0.0151975683890578	10/658; 7/658; 3/658; 2/658; 1/658	33; 24; 12; 9; 6	NA	NA	NA	NA	NA	NA	ENST00000373203.9:reverse,c.-258C>G,259,out_of_frame_(1),UTR5,not_overlapping,10[/658](aa),127854644,127854614,33,127854355,127815682,c.-289,c.-259,TGA,NM_001114753.3|ENST00000373203.9:reverse,c.-258C>G,259,out_of_frame_(1),UTR5,not_overlapping,7[/658](aa),127854635,127854614,24,127854355,127815682,c.-280,c.-259,TGA,NM_001114753.3|ENST00000373203.9:reverse,c.-258C>G,259,out_of_frame_(1),UTR5,not_…	NA	NA	NA	NA	NA	TGA; TGA; TGA; TGA; TGA	127854355; 127854355; 127854355; 127854355; 127854355	127815682; 127815682; 127815682; 127815682; 127815682	127854644; 127854635; 127854623; 127854620; 127854617	127854614; 127854614; 127854614; 127854614; 127854614	NA	NA	NA	c.-289; c.-280; c.-268; c.-265; c.-262	c.-259; c.-259; c.-259; c.-259; c.-259	.	.	.	.	.
chr9	127854613	G	T	ENST00000373203.9:reverse; ENST00000373203.9:reverse; ENST00000373203.9:reverse; ENST00000373203.9:reverse; ENST00000373203.9:reverse	NM_001114753.3; NM_001114753.3; NM_001114753.3; NM_001114753.3; NM_001114753.3	ENG	.	c.-258C>A; c.-258C>A; c.-258C>A; c.-258C>A; c.-258C>A	UTR5	new_uSTOP	out_of_frame_(1); out_of_frame_(1); out_of_frame_(1); out_of_frame_(1); out_of_frame_(1)	not_overlapping; not_overlapping; not_overlapping; not_overlapping; not_overlapping	0.0151975683890578	10/658; 7/658; 3/658; 2/658; 1/658	33; 24; 12; 9; 6	NA	NA	NA	NA	NA	NA	ENST00000373203.9:reverse,c.-258C>A,259,out_of_frame_(1),UTR5,not_overlapping,10[/658](aa),127854644,127854614,33,127854355,127815682,c.-289,c.-259,TAA,NM_001114753.3|ENST00000373203.9:reverse,c.-258C>A,259,out_of_frame_(1),UTR5,not_overlapping,7[/658](aa),127854635,127854614,24,127854355,127815682,c.-280,c.-259,TAA,NM_001114753.3|ENST00000373203.9:reverse,c.-258C>A,259,out_of_frame_(1),UTR5,not_…	NA	NA	NA	NA	NA	TAA; TAA; TAA; TAA; TAA	127854355; 127854355; 127854355; 127854355; 127854355	127815682; 127815682; 127815682; 127815682; 127815682	127854644; 127854635; 127854623; 127854620; 127854617	127854614; 127854614; 127854614; 127854614; 127854614	NA	NA	NA	c.-289; c.-280; c.-268; c.-265; c.-262	c.-259; c.-259; c.-259; c.-259; c.-259	.	.	.	.	.
chr9	127854608	G	T	ENST00000373203.9:reverse	NM_001114753.3	ENG	rs974401405	c.-253C>A	UTR5	new_uSTOP	in_frame	not_overlapping	0.0243161094224924	16/658	51	NA	NA	NA	NA	NA	NA	ENST00000373203.9:reverse,c.-253C>A,255,in_frame,UTR5,not_overlapping,16[/658](aa),127854658,127854610,51,127854355,127815682,c.-303,c.-255,TGA,NM_001114753.3	NA	NA	NA	NA	NA	TGA	127854355	127815682	127854658	127854610	NA	NA	NA	c.-303	c.-255	3.942e-05	5.88e-05	.	.	.
chr9	127854600	A	T	ENST00000373203.9:reverse	NM_001114753.3	ENG	.	c.-245T>A	UTR5	new_uSTOP	in_frame	not_overlapping	0.0288753799392097	19/658	60	NA	NA	NA	NA	NA	NA	ENST00000373203.9:reverse,c.-245T>A,246,in_frame,UTR5,not_overlapping,19[/658](aa),127854658,127854601,60,127854355,127815682,c.-303,c.-246,TAG,NM_001114753.3	NA	NA	NA	NA	NA	TAG	127854355	127815682	127854658	127854601	NA	NA	NA	c.-303	c.-246	.	.	.	.	.
chr9	127854599	C	A	ENST00000373203.9:reverse; ENST00000373203.9:reverse; ENST00000373203.9:reverse; ENST00000373203.9:reverse; ENST00000373203.9:reverse; ENST00000373203.9:reverse; ENST00000373203.9:reverse	NM_001114753.3; NM_001114753.3; NM_001114753.3; NM_001114753.3; NM_001114753.3; NM_001114753.3; NM_001114753.3	ENG	.	c.-244G>T; c.-244G>T; c.-244G>T; c.-244G>T; c.-244G>T; c.-244G>T; c.-244G>T	UTR5	new_uSTOP	out_of_frame_(1); out_of_frame_(1); out_of_frame_(1); out_of_frame_(1); out_of_frame_(1); out_of_frame_(1); out_of_frame_(1)	not_overlapping; not_overlapping; not_overlapping; not_overlapping; not_overlapping; not_overlapping; not_overlapping	0.0227963525835866	15/658; 12/658; 8/658; 7/658; 6/658; 4/658; 1/658	48; 39; 27; 24; 21; 15; 6	NA	NA	NA	NA	NA	NA	ENST00000373203.9:reverse,c.-244G>T,244,out_of_frame_(1),UTR5,not_overlapping,15[/658](aa),127854644,127854599,48,127854355,127815682,c.-289,c.-244,TGA,NM_001114753.3|ENST00000373203.9:reverse,c.-244G>T,244,out_of_frame_(1),UTR5,not_overlapping,12[/658](aa),127854635,127854599,39,127854355,127815682,c.-280,c.-244,TGA,NM_001114753.3|ENST00000373203.9:reverse,c.-244G>T,244,out_of_frame_(1),UTR5,not…	NA	NA	NA	NA	NA	TGA; TGA; TGA; TGA; TGA; TGA; TGA	127854355; 127854355; 127854355; 127854355; 127854355; 127854355; 127854355	127815682; 127815682; 127815682; 127815682; 127815682; 127815682; 127815682	127854644; 127854635; 127854623; 127854620; 127854617; 127854611; 127854602	127854599; 127854599; 127854599; 127854599; 127854599; 127854599; 127854599	NA	NA	NA	c.-289; c.-280; c.-268; c.-265; c.-262; c.-256; c.-247	c.-244; c.-244; c.-244; c.-244; c.-244; c.-244; c.-244	.	.	.	.	.
chr9	127854599	C	T	ENST00000373203.9:reverse; ENST00000373203.9:reverse; ENST00000373203.9:reverse	NM_001114753.3; NM_001114753.3; NM_001114753.3	ENG	.	c.-244G>A; c.-244G>A; c.-244G>A	UTR5	new_uSTOP	out_of_frame_(2); out_of_frame_(2); out_of_frame_(2)	not_overlapping; not_overlapping; not_overlapping	0.0212765957446809	14/658; 9/658; 2/658	45; 30; 9	NA	NA	NA	NA	NA	NA	ENST00000373203.9:reverse,c.-244G>A,245,out_of_frame_(2),UTR5,not_overlapping,14[/658](aa),127854642,127854600,45,127854355,127815682,c.-287,c.-245,TAG,NM_001114753.3|ENST00000373203.9:reverse,c.-244G>A,245,out_of_frame_(2),UTR5,not_overlapping,9[/658](aa),127854627,127854600,30,127854355,127815682,c.-272,c.-245,TAG,NM_001114753.3|ENST00000373203.9:reverse,c.-244G>A,245,out_of_frame_(2),UTR5,not_…	NA	NA	NA	NA	NA	TAG; TAG; TAG	127854355; 127854355; 127854355	127815682; 127815682; 127815682	127854642; 127854627; 127854606	127854600; 127854600; 127854600	NA	NA	NA	c.-287; c.-272; c.-251	c.-245; c.-245; c.-245	.	.	.	.	.
chr9	127854598	C	A	ENST00000373203.9:reverse; ENST00000373203.9:reverse	NM_001114753.3; NM_001114753.3	ENG	.	c.-243G>T; c.-243G>T	UTR5	new_uSTOP	in_frame; in_frame	not_overlapping; not_overlapping	0.0303951367781155	20/658; 1/658	63; 6	NA	NA	NA	NA	NA	NA	ENST00000373203.9:reverse,c.-243G>T,243,in_frame,UTR5,not_overlapping,20[/658](aa),127854658,127854598,63,127854355,127815682,c.-303,c.-243,TAG,NM_001114753.3|ENST00000373203.9:reverse,c.-243G>T,243,in_frame,UTR5,not_overlapping,1[/658](aa),127854601,127854598,6,127854355,127815682,c.-246,c.-243,TAG,NM_001114753.3	NA	NA	NA	NA	NA	TAG; TAG	127854355; 127854355	127815682; 127815682	127854658; 127854601	127854598; 127854598	NA	NA	NA	c.-303; c.-246	c.-243; c.-243	.	.	.	.	.
chr9	127854598	C	T	ENST00000373203.9:reverse; ENST00000373203.9:reverse; ENST00000373203.9:reverse	NM_001114753.3; NM_001114753.3; NM_001114753.3	ENG	.	c.-243G>A; c.-243G>A; c.-243G>A	UTR5	new_uSTOP	out_of_frame_(2); out_of_frame_(2); out_of_frame_(2)	not_overlapping; not_overlapping; not_overlapping	0.0212765957446809	14/658; 9/658; 2/658	45; 30; 9	NA	NA	NA	NA	NA	NA	ENST00000373203.9:reverse,c.-243G>A,245,out_of_frame_(2),UTR5,not_overlapping,14[/658](aa),127854642,127854600,45,127854355,127815682,c.-287,c.-245,TGA,NM_001114753.3|ENST00000373203.9:reverse,c.-243G>A,245,out_of_frame_(2),UTR5,not_overlapping,9[/658](aa),127854627,127854600,30,127854355,127815682,c.-272,c.-245,TGA,NM_001114753.3|ENST00000373203.9:reverse,c.-243G>A,245,out_of_frame_(2),UTR5,not_…	NA	NA	NA	NA	NA	TGA; TGA; TGA	127854355; 127854355; 127854355	127815682; 127815682; 127815682	127854642; 127854627; 127854606	127854600; 127854600; 127854600	NA	NA	NA	c.-287; c.-272; c.-251	c.-245; c.-245; c.-245	.	.	.	.	.
chr9	127854593	G	A	ENST00000373203.9:reverse; ENST00000373203.9:reverse; ENST00000373203.9:reverse; ENST00000373203.9:reverse; ENST00000373203.9:reverse; ENST00000373203.9:reverse; ENST00000373203.9:reverse	NM_001114753.3; NM_001114753.3; NM_001114753.3; NM_001114753.3; NM_001114753.3; NM_001114753.3; NM_001114753.3	ENG	.	c.-238C>T; c.-238C>T; c.-238C>T; c.-238C>T; c.-238C>T; c.-238C>T; c.-238C>T	UTR5	new_uSTOP	out_of_frame_(1); out_of_frame_(1); out_of_frame_(1); out_of_frame_(1); out_of_frame_(1); out_of_frame_(1); out_of_frame_(1)	not_overlapping; not_overlapping; not_overlapping; not_overlapping; not_overlapping; not_overlapping; not_overlapping	0.0258358662613982	17/658; 14/658; 10/658; 9/658; 8/658; 6/658; 3/658	54; 45; 33; 30; 27; 21; 12	NA	NA	NA	NA	NA	NA	ENST00000373203.9:reverse,c.-238C>T,238,out_of_frame_(1),UTR5,not_overlapping,17[/658](aa),127854644,127854593,54,127854355,127815682,c.-289,c.-238,TAG,NM_001114753.3|ENST00000373203.9:reverse,c.-238C>T,238,out_of_frame_(1),UTR5,not_overlapping,14[/658](aa),127854635,127854593,45,127854355,127815682,c.-280,c.-238,TAG,NM_001114753.3|ENST00000373203.9:reverse,c.-238C>T,238,out_of_frame_(1),UTR5,not…	NA	NA	NA	NA	NA	TAG; TAG; TAG; TAG; TAG; TAG; TAG	127854355; 127854355; 127854355; 127854355; 127854355; 127854355; 127854355	127815682; 127815682; 127815682; 127815682; 127815682; 127815682; 127815682	127854644; 127854635; 127854623; 127854620; 127854617; 127854611; 127854602	127854593; 127854593; 127854593; 127854593; 127854593; 127854593; 127854593	NA	NA	NA	c.-289; c.-280; c.-268; c.-265; c.-262; c.-256; c.-247	c.-238; c.-238; c.-238; c.-238; c.-238; c.-238; c.-238	.	.	.	.	.
chr9	127854568	G	T	ENST00000373203.9:reverse; ENST00000373203.9:reverse; ENST00000373203.9:reverse; ENST00000373203.9:reverse; ENST00000373203.9:reverse; ENST00000373203.9:reverse; ENST00000373203.9:reverse	NM_001114753.3; NM_001114753.3; NM_001114753.3; NM_001114753.3; NM_001114753.3; NM_001114753.3; NM_001114753.3	ENG	.	c.-213C>A; c.-213C>A; c.-213C>A; c.-213C>A; c.-213C>A; c.-213C>A; c.-213C>A	UTR5	new_uSTOP	out_of_frame_(1); out_of_frame_(1); out_of_frame_(1); out_of_frame_(1); out_of_frame_(1); out_of_frame_(1); out_of_frame_(1)	not_overlapping; not_overlapping; not_overlapping; not_overlapping; not_overlapping; not_overlapping; not_overlapping	0.0379939209726444	25/658; 22/658; 18/658; 17/658; 16/658; 14/658; 11/658	78; 69; 57; 54; 51; 45; 36	NA	NA	NA	NA	NA	NA	ENST00000373203.9:reverse,c.-213C>A,214,out_of_frame_(1),UTR5,not_overlapping,25[/658](aa),127854644,127854569,78,127854355,127815682,c.-289,c.-214,TAG,NM_001114753.3|ENST00000373203.9:reverse,c.-213C>A,214,out_of_frame_(1),UTR5,not_overlapping,22[/658](aa),127854635,127854569,69,127854355,127815682,c.-280,c.-214,TAG,NM_001114753.3|ENST00000373203.9:reverse,c.-213C>A,214,out_of_frame_(1),UTR5,not…	NA	NA	NA	NA	NA	TAG; TAG; TAG; TAG; TAG; TAG; TAG	127854355; 127854355; 127854355; 127854355; 127854355; 127854355; 127854355	127815682; 127815682; 127815682; 127815682; 127815682; 127815682; 127815682	127854644; 127854635; 127854623; 127854620; 127854617; 127854611; 127854602	127854569; 127854569; 127854569; 127854569; 127854569; 127854569; 127854569	NA	NA	NA	c.-289; c.-280; c.-268; c.-265; c.-262; c.-256; c.-247	c.-214; c.-214; c.-214; c.-214; c.-214; c.-214; c.-214	.	.	.	.	.
chr9	127854567	C	A	ENST00000373203.9:reverse; ENST00000373203.9:reverse; ENST00000373203.9:reverse	NM_001114753.3; NM_001114753.3; NM_001114753.3	ENG	.	c.-212G>T; c.-212G>T; c.-212G>T	UTR5	new_uSTOP	out_of_frame_(2); out_of_frame_(2); out_of_frame_(2)	not_overlapping; not_overlapping; not_overlapping	0.0379939209726444	25/658; 20/658; 13/658	78; 63; 42	NA	NA	NA	NA	NA	NA	ENST00000373203.9:reverse,c.-212G>T,212,out_of_frame_(2),UTR5,not_overlapping,25[/658](aa),127854642,127854567,78,127854355,127815682,c.-287,c.-212,TGA,NM_001114753.3|ENST00000373203.9:reverse,c.-212G>T,212,out_of_frame_(2),UTR5,not_overlapping,20[/658](aa),127854627,127854567,63,127854355,127815682,c.-272,c.-212,TGA,NM_001114753.3|ENST00000373203.9:reverse,c.-212G>T,212,out_of_frame_(2),UTR5,not…	NA	NA	NA	NA	NA	TGA; TGA; TGA	127854355; 127854355; 127854355	127815682; 127815682; 127815682	127854642; 127854627; 127854606	127854567; 127854567; 127854567	NA	NA	NA	c.-287; c.-272; c.-251	c.-212; c.-212; c.-212	.	.	.	.	.
chr9	127854564	G	A	ENST00000373203.9:reverse; ENST00000373203.9:reverse; ENST00000373203.9:reverse	NM_001114753.3; NM_001114753.3; NM_001114753.3	ENG	.	c.-209C>T; c.-209C>T; c.-209C>T	UTR5	new_uSTOP	out_of_frame_(2); out_of_frame_(2); out_of_frame_(2)	not_overlapping; not_overlapping; not_overlapping	0.0395136778115502	26/658; 21/658; 14/658	81; 66; 45	NA	NA	NA	NA	NA	NA	ENST00000373203.9:reverse,c.-209C>T,209,out_of_frame_(2),UTR5,not_overlapping,26[/658](aa),127854642,127854564,81,127854355,127815682,c.-287,c.-209,TAG,NM_001114753.3|ENST00000373203.9:reverse,c.-209C>T,209,out_of_frame_(2),UTR5,not_overlapping,21[/658](aa),127854627,127854564,66,127854355,127815682,c.-272,c.-209,TAG,NM_001114753.3|ENST00000373203.9:reverse,c.-209C>T,209,out_of_frame_(2),UTR5,not…	NA	NA	NA	NA	NA	TAG; TAG; TAG	127854355; 127854355; 127854355	127815682; 127815682; 127815682	127854642; 127854627; 127854606	127854564; 127854564; 127854564	NA	NA	NA	c.-287; c.-272; c.-251	c.-209; c.-209; c.-209	6.571e-06	.	.	.	.
chr9	127854561	G	A	ENST00000373203.9:reverse; ENST00000373203.9:reverse; ENST00000373203.9:reverse	NM_001114753.3; NM_001114753.3; NM_001114753.3	ENG	.	c.-206C>T; c.-206C>T; c.-206C>T	UTR5	new_uSTOP	out_of_frame_(2); out_of_frame_(2); out_of_frame_(2)	not_overlapping; not_overlapping; not_overlapping	0.0410334346504559	27/658; 22/658; 15/658	84; 69; 48	NA	NA	NA	NA	NA	NA	ENST00000373203.9:reverse,c.-206C>T,206,out_of_frame_(2),UTR5,not_overlapping,27[/658](aa),127854642,127854561,84,127854355,127815682,c.-287,c.-206,TAA,NM_001114753.3|ENST00000373203.9:reverse,c.-206C>T,206,out_of_frame_(2),UTR5,not_overlapping,22[/658](aa),127854627,127854561,69,127854355,127815682,c.-272,c.-206,TAA,NM_001114753.3|ENST00000373203.9:reverse,c.-206C>T,206,out_of_frame_(2),UTR5,not…	NA	NA	NA	NA	NA	TAA; TAA; TAA	127854355; 127854355; 127854355	127815682; 127815682; 127815682	127854642; 127854627; 127854606	127854561; 127854561; 127854561	NA	NA	NA	c.-287; c.-272; c.-251	c.-206; c.-206; c.-206	.	.	.	.	.
chr9	127854555	G	A	ENST00000373203.9:reverse; ENST00000373203.9:reverse; ENST00000373203.9:reverse	NM_001114753.3; NM_001114753.3; NM_001114753.3	ENG	.	c.-200C>T; c.-200C>T; c.-200C>T	UTR5	new_uSTOP	out_of_frame_(2); out_of_frame_(2); out_of_frame_(2)	not_overlapping; not_overlapping; not_overlapping	0.0440729483282675	29/658; 24/658; 17/658	90; 75; 54	NA	NA	NA	NA	NA	NA	ENST00000373203.9:reverse,c.-200C>T,200,out_of_frame_(2),UTR5,not_overlapping,29[/658](aa),127854642,127854555,90,127854355,127815682,c.-287,c.-200,TAG,NM_001114753.3|ENST00000373203.9:reverse,c.-200C>T,200,out_of_frame_(2),UTR5,not_overlapping,24[/658](aa),127854627,127854555,75,127854355,127815682,c.-272,c.-200,TAG,NM_001114753.3|ENST00000373203.9:reverse,c.-200C>T,200,out_of_frame_(2),UTR5,not…	NA	NA	NA	NA	NA	TAG; TAG; TAG	127854355; 127854355; 127854355	127815682; 127815682; 127815682	127854642; 127854627; 127854606	127854555; 127854555; 127854555	NA	NA	NA	c.-287; c.-272; c.-251	c.-200; c.-200; c.-200	6.572e-06	1.47e-05	.	.	.
chr9	127854550	G	A	ENST00000373203.9:reverse; ENST00000373203.9:reverse; ENST00000373203.9:reverse	NM_001114753.3; NM_001114753.3; NM_001114753.3	ENG	.	c.-195C>T; c.-195C>T; c.-195C>T	UTR5	new_uSTOP	in_frame; in_frame; in_frame	not_overlapping; not_overlapping; not_overlapping	0.0547112462006079	36/658; 17/658; 8/658	111; 54; 27	NA	NA	NA	NA	NA	NA	ENST00000373203.9:reverse,c.-195C>T,195,in_frame,UTR5,not_overlapping,36[/658](aa),127854658,127854550,111,127854355,127815682,c.-303,c.-195,TAG,NM_001114753.3|ENST00000373203.9:reverse,c.-195C>T,195,in_frame,UTR5,not_overlapping,17[/658](aa),127854601,127854550,54,127854355,127815682,c.-246,c.-195,TAG,NM_001114753.3|ENST00000373203.9:reverse,c.-195C>T,195,in_frame,UTR5,not_overlapping,8[/658](aa…	NA	NA	NA	NA	NA	TAG; TAG; TAG	127854355; 127854355; 127854355	127815682; 127815682; 127815682	127854658; 127854601; 127854574	127854550; 127854550; 127854550	NA	NA	NA	c.-303; c.-246; c.-219	c.-195; c.-195; c.-195	.	.	.	.	.
chr9	127854534	A	T	ENST00000373203.9:reverse; ENST00000373203.9:reverse; ENST00000373203.9:reverse; ENST00000373203.9:reverse; ENST00000373203.9:reverse; ENST00000373203.9:reverse; ENST00000373203.9:reverse	NM_001114753.3; NM_001114753.3; NM_001114753.3; NM_001114753.3; NM_001114753.3; NM_001114753.3; NM_001114753.3	ENG	.	c.-179T>A; c.-179T>A; c.-179T>A; c.-179T>A; c.-179T>A; c.-179T>A; c.-179T>A	UTR5	new_uSTOP	out_of_frame_(1); out_of_frame_(1); out_of_frame_(1); out_of_frame_(1); out_of_frame_(1); out_of_frame_(1); out_of_frame_(1)	not_overlapping; not_overlapping; not_overlapping; not_overlapping; not_overlapping; not_overlapping; not_overlapping	0.0547112462006079	36/658; 33/658; 29/658; 28/658; 27/658; 25/658; 22/658	111; 102; 90; 87; 84; 78; 69	NA	NA	NA	NA	NA	NA	ENST00000373203.9:reverse,c.-179T>A,181,out_of_frame_(1),UTR5,not_overlapping,36[/658](aa),127854644,127854536,111,127854355,127815682,c.-289,c.-181,TGA,NM_001114753.3|ENST00000373203.9:reverse,c.-179T>A,181,out_of_frame_(1),UTR5,not_overlapping,33[/658](aa),127854635,127854536,102,127854355,127815682,c.-280,c.-181,TGA,NM_001114753.3|ENST00000373203.9:reverse,c.-179T>A,181,out_of_frame_(1),UTR5,n…	NA	NA	NA	NA	NA	TGA; TGA; TGA; TGA; TGA; TGA; TGA	127854355; 127854355; 127854355; 127854355; 127854355; 127854355; 127854355	127815682; 127815682; 127815682; 127815682; 127815682; 127815682; 127815682	127854644; 127854635; 127854623; 127854620; 127854617; 127854611; 127854602	127854536; 127854536; 127854536; 127854536; 127854536; 127854536; 127854536	NA	NA	NA	c.-289; c.-280; c.-268; c.-265; c.-262; c.-256; c.-247	c.-181; c.-181; c.-181; c.-181; c.-181; c.-181; c.-181	.	.	.	.	.
chr9	127854532	A	T	ENST00000373203.9:reverse; ENST00000373203.9:reverse; ENST00000373203.9:reverse; ENST00000373203.9:reverse	NM_001114753.3; NM_001114753.3; NM_001114753.3; NM_001114753.3	ENG	.	c.-177T>A; c.-177T>A; c.-177T>A; c.-177T>A	UTR5	new_uSTOP	out_of_frame_(2); out_of_frame_(2); out_of_frame_(2); out_of_frame_(2)	not_overlapping; not_overlapping; not_overlapping; not_overlapping	0.0547112462006079	36/658; 31/658; 24/658; 1/658	111; 96; 75; 6	NA	NA	NA	NA	NA	NA	ENST00000373203.9:reverse,c.-177T>A,179,out_of_frame_(2),UTR5,not_overlapping,36[/658](aa),127854642,127854534,111,127854355,127815682,c.-287,c.-179,TGA,NM_001114753.3|ENST00000373203.9:reverse,c.-177T>A,179,out_of_frame_(2),UTR5,not_overlapping,31[/658](aa),127854627,127854534,96,127854355,127815682,c.-272,c.-179,TGA,NM_001114753.3|ENST00000373203.9:reverse,c.-177T>A,179,out_of_frame_(2),UTR5,no…	NA	NA	NA	NA	NA	TGA; TGA; TGA; TGA	127854355; 127854355; 127854355; 127854355	127815682; 127815682; 127815682; 127815682	127854642; 127854627; 127854606; 127854537	127854534; 127854534; 127854534; 127854534	NA	NA	NA	c.-287; c.-272; c.-251; c.-182	c.-179; c.-179; c.-179; c.-179	.	.	.	.	.
chr9	127854513	G	T	ENST00000373203.9:reverse; ENST00000373203.9:reverse; ENST00000373203.9:reverse; ENST00000373203.9:reverse	NM_001114753.3; NM_001114753.3; NM_001114753.3; NM_001114753.3	ENG	.	c.-158C>A; c.-158C>A; c.-158C>A; c.-158C>A	UTR5	new_uSTOP	in_frame; in_frame; in_frame; in_frame	not_overlapping; not_overlapping; not_overlapping; not_overlapping	0.0729483282674772	48/658; 29/658; 20/658; 7/658	147; 90; 63; 24	NA	NA	NA	NA	NA	NA	ENST00000373203.9:reverse,c.-158C>A,159,in_frame,UTR5,not_overlapping,48[/658](aa),127854658,127854514,147,127854355,127815682,c.-303,c.-159,TAG,NM_001114753.3|ENST00000373203.9:reverse,c.-158C>A,159,in_frame,UTR5,not_overlapping,29[/658](aa),127854601,127854514,90,127854355,127815682,c.-246,c.-159,TAG,NM_001114753.3|ENST00000373203.9:reverse,c.-158C>A,159,in_frame,UTR5,not_overlapping,20[/658](a…	NA	NA	NA	NA	NA	TAG; TAG; TAG; TAG	127854355; 127854355; 127854355; 127854355	127815682; 127815682; 127815682; 127815682	127854658; 127854601; 127854574; 127854535	127854514; 127854514; 127854514; 127854514	NA	NA	NA	c.-303; c.-246; c.-219; c.-180	c.-159; c.-159; c.-159; c.-159	.	.	.	.	.
chr9	127854501	G	A	ENST00000373203.9:reverse; ENST00000373203.9:reverse; ENST00000373203.9:reverse; ENST00000373203.9:reverse; ENST00000373203.9:reverse	NM_001114753.3; NM_001114753.3; NM_001114753.3; NM_001114753.3; NM_001114753.3	ENG	.	c.-146C>T; c.-146C>T; c.-146C>T; c.-146C>T; c.-146C>T	UTR5	new_uSTOP	out_of_frame_(2); out_of_frame_(2); out_of_frame_(2); out_of_frame_(2); out_of_frame_(2)	not_overlapping; not_overlapping; not_overlapping; not_overlapping; not_overlapping	0.0714285714285714	47/658; 42/658; 35/658; 12/658; 7/658	144; 129; 108; 39; 24	NA	NA	NA	NA	NA	NA	ENST00000373203.9:reverse,c.-146C>T,146,out_of_frame_(2),UTR5,not_overlapping,47[/658](aa),127854642,127854501,144,127854355,127815682,c.-287,c.-146,TAG,NM_001114753.3|ENST00000373203.9:reverse,c.-146C>T,146,out_of_frame_(2),UTR5,not_overlapping,42[/658](aa),127854627,127854501,129,127854355,127815682,c.-272,c.-146,TAG,NM_001114753.3|ENST00000373203.9:reverse,c.-146C>T,146,out_of_frame_(2),UTR5,n…	NA	NA	NA	NA	NA	TAG; TAG; TAG; TAG; TAG	127854355; 127854355; 127854355; 127854355; 127854355	127815682; 127815682; 127815682; 127815682; 127815682	127854642; 127854627; 127854606; 127854537; 127854522	127854501; 127854501; 127854501; 127854501; 127854501	NA	NA	NA	c.-287; c.-272; c.-251; c.-182; c.-167	c.-146; c.-146; c.-146; c.-146; c.-146	.	.	.	.	.
chr9	127854499	C	A	ENST00000373203.9:reverse; ENST00000373203.9:reverse; ENST00000373203.9:reverse; ENST00000373203.9:reverse	NM_001114753.3; NM_001114753.3; NM_001114753.3; NM_001114753.3	ENG	.	c.-144G>T; c.-144G>T; c.-144G>T; c.-144G>T	UTR5	new_uSTOP	in_frame; in_frame; in_frame; in_frame	not_overlapping; not_overlapping; not_overlapping; not_overlapping	0.0805471124620061	53/658; 34/658; 25/658; 12/658	162; 105; 78; 39	NA	NA	NA	NA	NA	NA	ENST00000373203.9:reverse,c.-144G>T,144,in_frame,UTR5,not_overlapping,53[/658](aa),127854658,127854499,162,127854355,127815682,c.-303,c.-144,TAA,NM_001114753.3|ENST00000373203.9:reverse,c.-144G>T,144,in_frame,UTR5,not_overlapping,34[/658](aa),127854601,127854499,105,127854355,127815682,c.-246,c.-144,TAA,NM_001114753.3|ENST00000373203.9:reverse,c.-144G>T,144,in_frame,UTR5,not_overlapping,25[/658](…	NA	NA	NA	NA	NA	TAA; TAA; TAA; TAA	127854355; 127854355; 127854355; 127854355	127815682; 127815682; 127815682; 127815682	127854658; 127854601; 127854574; 127854535	127854499; 127854499; 127854499; 127854499	NA	NA	NA	c.-303; c.-246; c.-219; c.-180	c.-144; c.-144; c.-144; c.-144	.	.	.	.	.
chr9	127854498	T	A	ENST00000373203.9:reverse; ENST00000373203.9:reverse; ENST00000373203.9:reverse; ENST00000373203.9:reverse; ENST00000373203.9:reverse	NM_001114753.3; NM_001114753.3; NM_001114753.3; NM_001114753.3; NM_001114753.3	ENG	.	c.-143A>T; c.-143A>T; c.-143A>T; c.-143A>T; c.-143A>T	UTR5	new_uSTOP	out_of_frame_(2); out_of_frame_(2); out_of_frame_(2); out_of_frame_(2); out_of_frame_(2)	not_overlapping; not_overlapping; not_overlapping; not_overlapping; not_overlapping	0.0729483282674772	48/658; 43/658; 36/658; 13/658; 8/658	147; 132; 111; 42; 27	NA	NA	NA	NA	NA	NA	ENST00000373203.9:reverse,c.-143A>T,143,out_of_frame_(2),UTR5,not_overlapping,48[/658](aa),127854642,127854498,147,127854355,127815682,c.-287,c.-143,TAG,NM_001114753.3|ENST00000373203.9:reverse,c.-143A>T,143,out_of_frame_(2),UTR5,not_overlapping,43[/658](aa),127854627,127854498,132,127854355,127815682,c.-272,c.-143,TAG,NM_001114753.3|ENST00000373203.9:reverse,c.-143A>T,143,out_of_frame_(2),UTR5,n…	NA	NA	NA	NA	NA	TAG; TAG; TAG; TAG; TAG	127854355; 127854355; 127854355; 127854355; 127854355	127815682; 127815682; 127815682; 127815682; 127815682	127854642; 127854627; 127854606; 127854537; 127854522	127854498; 127854498; 127854498; 127854498; 127854498	NA	NA	NA	c.-287; c.-272; c.-251; c.-182; c.-167	c.-143; c.-143; c.-143; c.-143; c.-143	.	.	.	.	.
chr9	127854492	C	A	ENST00000373203.9:reverse; ENST00000373203.9:reverse; ENST00000373203.9:reverse; ENST00000373203.9:reverse; ENST00000373203.9:reverse; ENST00000373203.9:reverse	NM_001114753.3; NM_001114753.3; NM_001114753.3; NM_001114753.3; NM_001114753.3; NM_001114753.3	ENG	.	c.-137G>T; c.-137G>T; c.-137G>T; c.-137G>T; c.-137G>T; c.-137G>T	UTR5	new_uSTOP	out_of_frame_(2); out_of_frame_(2); out_of_frame_(2); out_of_frame_(2); out_of_frame_(2); out_of_frame_(2)	not_overlapping; not_overlapping; not_overlapping; not_overlapping; not_overlapping; not_overlapping	0.0759878419452888	50/658; 45/658; 38/658; 15/658; 10/658; 2/658	153; 138; 117; 48; 33; 9	NA	NA	NA	NA	NA	NA	ENST00000373203.9:reverse,c.-137G>T,137,out_of_frame_(2),UTR5,not_overlapping,50[/658](aa),127854642,127854492,153,127854355,127815682,c.-287,c.-137,TGA,NM_001114753.3|ENST00000373203.9:reverse,c.-137G>T,137,out_of_frame_(2),UTR5,not_overlapping,45[/658](aa),127854627,127854492,138,127854355,127815682,c.-272,c.-137,TGA,NM_001114753.3|ENST00000373203.9:reverse,c.-137G>T,137,out_of_frame_(2),UTR5,n…	NA	NA	NA	NA	NA	TGA; TGA; TGA; TGA; TGA; TGA	127854355; 127854355; 127854355; 127854355; 127854355; 127854355	127815682; 127815682; 127815682; 127815682; 127815682; 127815682	127854642; 127854627; 127854606; 127854537; 127854522; 127854498	127854492; 127854492; 127854492; 127854492; 127854492; 127854492	NA	NA	NA	c.-287; c.-272; c.-251; c.-182; c.-167; c.-143	c.-137; c.-137; c.-137; c.-137; c.-137; c.-137	.	.	.	.	.
chr9	127854492	C	T	ENST00000373203.9:reverse; ENST00000373203.9:reverse; ENST00000373203.9:reverse; ENST00000373203.9:reverse	NM_001114753.3; NM_001114753.3; NM_001114753.3; NM_001114753.3	ENG	.	c.-137G>A; c.-137G>A; c.-137G>A; c.-137G>A	UTR5	new_uSTOP	in_frame; in_frame; in_frame; in_frame	not_overlapping; not_overlapping; not_overlapping; not_overlapping	0.0835866261398176	55/658; 36/658; 27/658; 14/658	168; 111; 84; 45	NA	NA	NA	NA	NA	NA	ENST00000373203.9:reverse,c.-137G>A,138,in_frame,UTR5,not_overlapping,55[/658](aa),127854658,127854493,168,127854355,127815682,c.-303,c.-138,TAG,NM_001114753.3|ENST00000373203.9:reverse,c.-137G>A,138,in_frame,UTR5,not_overlapping,36[/658](aa),127854601,127854493,111,127854355,127815682,c.-246,c.-138,TAG,NM_001114753.3|ENST00000373203.9:reverse,c.-137G>A,138,in_frame,UTR5,not_overlapping,27[/658](…	NA	NA	NA	NA	NA	TAG; TAG; TAG; TAG	127854355; 127854355; 127854355; 127854355	127815682; 127815682; 127815682; 127815682	127854658; 127854601; 127854574; 127854535	127854493; 127854493; 127854493; 127854493	NA	NA	NA	c.-303; c.-246; c.-219; c.-180	c.-138; c.-138; c.-138; c.-138	.	.	.	.	.
chr9	127854491	C	A	ENST00000373203.9:reverse; ENST00000373203.9:reverse	NM_001114753.3; NM_001114753.3	ENG	.	c.-136G>T; c.-136G>T	UTR5	new_uSTOP	out_of_frame_(1); out_of_frame_(1)	not_overlapping; not_overlapping	0.00303951367781155	2/658; 1/658	9; 6	NA	NA	NA	NA	NA	NA	ENST00000373203.9:reverse,c.-136G>T,136,out_of_frame_(1),UTR5,not_overlapping,2[/658](aa),127854497,127854491,9,127854355,127815682,c.-142,c.-136,TAG,NM_001114753.3|ENST00000373203.9:reverse,c.-136G>T,136,out_of_frame_(1),UTR5,not_overlapping,1[/658](aa),127854494,127854491,6,127854355,127815682,c.-139,c.-136,TAG,NM_001114753.3	NA	NA	NA	NA	NA	TAG; TAG	127854355; 127854355	127815682; 127815682	127854497; 127854494	127854491; 127854491	NA	NA	NA	c.-142; c.-139	c.-136; c.-136	.	.	.	.	.
chr9	127854491	C	T	ENST00000373203.9:reverse; ENST00000373203.9:reverse; ENST00000373203.9:reverse; ENST00000373203.9:reverse	NM_001114753.3; NM_001114753.3; NM_001114753.3; NM_001114753.3	ENG	.	c.-136G>A; c.-136G>A; c.-136G>A; c.-136G>A	UTR5	new_uSTOP	in_frame; in_frame; in_frame; in_frame	not_overlapping; not_overlapping; not_overlapping; not_overlapping	0.0835866261398176	55/658; 36/658; 27/658; 14/658	168; 111; 84; 45	NA	NA	NA	NA	NA	NA	ENST00000373203.9:reverse,c.-136G>A,138,in_frame,UTR5,not_overlapping,55[/658](aa),127854658,127854493,168,127854355,127815682,c.-303,c.-138,TGA,NM_001114753.3|ENST00000373203.9:reverse,c.-136G>A,138,in_frame,UTR5,not_overlapping,36[/658](aa),127854601,127854493,111,127854355,127815682,c.-246,c.-138,TGA,NM_001114753.3|ENST00000373203.9:reverse,c.-136G>A,138,in_frame,UTR5,not_overlapping,27[/658](…	NA	NA	NA	NA	NA	TGA; TGA; TGA; TGA	127854355; 127854355; 127854355; 127854355	127815682; 127815682; 127815682; 127815682	127854658; 127854601; 127854574; 127854535	127854493; 127854493; 127854493; 127854493	NA	NA	NA	c.-303; c.-246; c.-219; c.-180	c.-138; c.-138; c.-138; c.-138	.	.	.	.	.
chr9	127854488	G	A	ENST00000373203.9:reverse; ENST00000373203.9:reverse	NM_001114753.3; NM_001114753.3	ENG	.	c.-133C>T; c.-133C>T	UTR5	new_uSTOP	out_of_frame_(1); out_of_frame_(1)	not_overlapping; not_overlapping	0.00455927051671732	3/658; 2/658	12; 9	NA	NA	NA	NA	NA	NA	ENST00000373203.9:reverse,c.-133C>T,133,out_of_frame_(1),UTR5,not_overlapping,3[/658](aa),127854497,127854488,12,127854355,127815682,c.-142,c.-133,TAG,NM_001114753.3|ENST00000373203.9:reverse,c.-133C>T,133,out_of_frame_(1),UTR5,not_overlapping,2[/658](aa),127854494,127854488,9,127854355,127815682,c.-139,c.-133,TAG,NM_001114753.3	NA	NA	NA	NA	NA	TAG; TAG	127854355; 127854355	127815682; 127815682	127854497; 127854494	127854488; 127854488	NA	NA	NA	c.-142; c.-139	c.-133; c.-133	.	.	.	.	.
chr9	127854485	C	A	ENST00000373203.9:reverse; ENST00000373203.9:reverse	NM_001114753.3; NM_001114753.3	ENG	.	c.-130G>T; c.-130G>T	UTR5	new_uSTOP	out_of_frame_(1); out_of_frame_(1)	not_overlapping; not_overlapping	0.0060790273556231	4/658; 3/658	15; 12	NA	NA	NA	NA	NA	NA	ENST00000373203.9:reverse,c.-130G>T,130,out_of_frame_(1),UTR5,not_overlapping,4[/658](aa),127854497,127854485,15,127854355,127815682,c.-142,c.-130,TGA,NM_001114753.3|ENST00000373203.9:reverse,c.-130G>T,130,out_of_frame_(1),UTR5,not_overlapping,3[/658](aa),127854494,127854485,12,127854355,127815682,c.-139,c.-130,TGA,NM_001114753.3	NA	NA	NA	NA	NA	TGA; TGA	127854355; 127854355	127815682; 127815682	127854497; 127854494	127854485; 127854485	NA	NA	NA	c.-142; c.-139	c.-130; c.-130	.	.	.	.	.
chr9	127854476	G	T	ENST00000373203.9:reverse; ENST00000373203.9:reverse; ENST00000373203.9:reverse; ENST00000373203.9:reverse; ENST00000373203.9:reverse; ENST00000373203.9:reverse; ENST00000373203.9:reverse	NM_001114753.3; NM_001114753.3; NM_001114753.3; NM_001114753.3; NM_001114753.3; NM_001114753.3; NM_001114753.3	ENG	.	c.-121C>A; c.-121C>A; c.-121C>A; c.-121C>A; c.-121C>A; c.-121C>A; c.-121C>A	UTR5	new_uSTOP	out_of_frame_(2); out_of_frame_(2); out_of_frame_(2); out_of_frame_(2); out_of_frame_(2); out_of_frame_(2); out_of_frame_(2)	not_overlapping; not_overlapping; not_overlapping; not_overlapping; not_overlapping; not_overlapping; not_overlapping	0.0835866261398176	55/658; 50/658; 43/658; 20/658; 15/658; 7/658; 2/658	168; 153; 132; 63; 48; 24; 9	NA	NA	NA	NA	NA	NA	ENST00000373203.9:reverse,c.-121C>A,122,out_of_frame_(2),UTR5,not_overlapping,55[/658](aa),127854642,127854477,168,127854355,127815682,c.-287,c.-122,TAG,NM_001114753.3|ENST00000373203.9:reverse,c.-121C>A,122,out_of_frame_(2),UTR5,not_overlapping,50[/658](aa),127854627,127854477,153,127854355,127815682,c.-272,c.-122,TAG,NM_001114753.3|ENST00000373203.9:reverse,c.-121C>A,122,out_of_frame_(2),UTR5,n…	NA	NA	NA	NA	NA	TAG; TAG; TAG; TAG; TAG; TAG; TAG	127854355; 127854355; 127854355; 127854355; 127854355; 127854355; 127854355	127815682; 127815682; 127815682; 127815682; 127815682; 127815682; 127815682	127854642; 127854627; 127854606; 127854537; 127854522; 127854498; 127854483	127854477; 127854477; 127854477; 127854477; 127854477; 127854477; 127854477	NA	NA	NA	c.-287; c.-272; c.-251; c.-182; c.-167; c.-143; c.-128	c.-122; c.-122; c.-122; c.-122; c.-122; c.-122; c.-122	.	.	.	.	.
chr9	127854461	G	T	ENST00000373203.9:reverse; ENST00000373203.9:reverse; ENST00000373203.9:reverse; ENST00000373203.9:reverse; ENST00000373203.9:reverse	NM_001114753.3; NM_001114753.3; NM_001114753.3; NM_001114753.3; NM_001114753.3	ENG	.	c.-106C>A; c.-106C>A; c.-106C>A; c.-106C>A; c.-106C>A	UTR5	new_uSTOP	in_frame; in_frame; in_frame; in_frame; in_frame	not_overlapping; not_overlapping; not_overlapping; not_overlapping; not_overlapping	0.0987841945288754	65/658; 46/658; 37/658; 24/658; 8/658	198; 141; 114; 75; 27	NA	NA	NA	NA	NA	NA	ENST00000373203.9:reverse,c.-106C>A,108,in_frame,UTR5,not_overlapping,65[/658](aa),127854658,127854463,198,127854355,127815682,c.-303,c.-108,TGA,NM_001114753.3|ENST00000373203.9:reverse,c.-106C>A,108,in_frame,UTR5,not_overlapping,46[/658](aa),127854601,127854463,141,127854355,127815682,c.-246,c.-108,TGA,NM_001114753.3|ENST00000373203.9:reverse,c.-106C>A,108,in_frame,UTR5,not_overlapping,37[/658](…	NA	NA	NA	NA	NA	TGA; TGA; TGA; TGA; TGA	127854355; 127854355; 127854355; 127854355; 127854355	127815682; 127815682; 127815682; 127815682; 127815682	127854658; 127854601; 127854574; 127854535; 127854487	127854463; 127854463; 127854463; 127854463; 127854463	NA	NA	NA	c.-303; c.-246; c.-219; c.-180; c.-132	c.-108; c.-108; c.-108; c.-108; c.-108	.	.	.	.	.
chr9	127854454	G	T	ENST00000373203.9:reverse; ENST00000373203.9:reverse; ENST00000373203.9:reverse	NM_001114753.3; NM_001114753.3; NM_001114753.3	ENG	.	c.-99C>A; c.-99C>A; c.-99C>A	UTR5	new_uSTOP	out_of_frame_(1); out_of_frame_(1); out_of_frame_(1)	not_overlapping; not_overlapping; not_overlapping	0.0212765957446809	14/658; 13/658; 3/658	45; 42; 12	NA	NA	NA	NA	NA	NA	ENST00000373203.9:reverse,c.-99C>A,100,out_of_frame_(1),UTR5,not_overlapping,14[/658](aa),127854497,127854455,45,127854355,127815682,c.-142,c.-100,TAG,NM_001114753.3|ENST00000373203.9:reverse,c.-99C>A,100,out_of_frame_(1),UTR5,not_overlapping,13[/658](aa),127854494,127854455,42,127854355,127815682,c.-139,c.-100,TAG,NM_001114753.3|ENST00000373203.9:reverse,c.-99C>A,100,out_of_frame_(1),UTR5,not_ov…	NA	NA	NA	NA	NA	TAG; TAG; TAG	127854355; 127854355; 127854355	127815682; 127815682; 127815682	127854497; 127854494; 127854464	127854455; 127854455; 127854455	NA	NA	NA	c.-142; c.-139; c.-109	c.-100; c.-100; c.-100	.	.	.	.	.
chr9	127854442	G	A	ENST00000373203.9:reverse; ENST00000373203.9:reverse; ENST00000373203.9:reverse; ENST00000373203.9:reverse; ENST00000373203.9:reverse; ENST00000373203.9:reverse	NM_001114753.3; NM_001114753.3; NM_001114753.3; NM_001114753.3; NM_001114753.3; NM_001114753.3	ENG	rs964321855	c.-87C>T; c.-87C>T; c.-87C>T; c.-87C>T; c.-87C>T; c.-87C>T	UTR5	new_uSTOP	in_frame; in_frame; in_frame; in_frame; in_frame; in_frame	not_overlapping; not_overlapping; not_overlapping; not_overlapping; not_overlapping; not_overlapping	0.109422492401216	72/658; 53/658; 44/658; 31/658; 15/658; 1/658	219; 162; 135; 96; 48; 6	NA	NA	NA	NA	NA	NA	ENST00000373203.9:reverse,c.-87C>T,87,in_frame,UTR5,not_overlapping,72[/658](aa),127854658,127854442,219,127854355,127815682,c.-303,c.-87,TGA,NM_001114753.3|ENST00000373203.9:reverse,c.-87C>T,87,in_frame,UTR5,not_overlapping,53[/658](aa),127854601,127854442,162,127854355,127815682,c.-246,c.-87,TGA,NM_001114753.3|ENST00000373203.9:reverse,c.-87C>T,87,in_frame,UTR5,not_overlapping,44[/658](aa),1278…	NA	NA	NA	NA	NA	TGA; TGA; TGA; TGA; TGA; TGA	127854355; 127854355; 127854355; 127854355; 127854355; 127854355	127815682; 127815682; 127815682; 127815682; 127815682; 127815682	127854658; 127854601; 127854574; 127854535; 127854487; 127854445	127854442; 127854442; 127854442; 127854442; 127854442; 127854442	NA	NA	NA	c.-303; c.-246; c.-219; c.-180; c.-132; c.-90	c.-87; c.-87; c.-87; c.-87; c.-87; c.-87	6.569e-06	0.0002	.	.	.
chr9	127854442	G	T	ENST00000373203.9:reverse; ENST00000373203.9:reverse; ENST00000373203.9:reverse; ENST00000373203.9:reverse; ENST00000373203.9:reverse; ENST00000373203.9:reverse; ENST00000373203.9:reverse	NM_001114753.3; NM_001114753.3; NM_001114753.3; NM_001114753.3; NM_001114753.3; NM_001114753.3; NM_001114753.3	ENG	.	c.-87C>A; c.-87C>A; c.-87C>A; c.-87C>A; c.-87C>A; c.-87C>A; c.-87C>A	UTR5	new_uSTOP	out_of_frame_(2); out_of_frame_(2); out_of_frame_(2); out_of_frame_(2); out_of_frame_(2); out_of_frame_(2); out_of_frame_(2)	not_overlapping; not_overlapping; not_overlapping; not_overlapping; not_overlapping; not_overlapping; not_overlapping	0.100303951367781	66/658; 61/658; 54/658; 31/658; 26/658; 18/658; 13/658	201; 186; 165; 96; 81; 57; 42	NA	NA	NA	NA	NA	NA	ENST00000373203.9:reverse,c.-87C>A,89,out_of_frame_(2),UTR5,not_overlapping,66[/658](aa),127854642,127854444,201,127854355,127815682,c.-287,c.-89,TGA,NM_001114753.3|ENST00000373203.9:reverse,c.-87C>A,89,out_of_frame_(2),UTR5,not_overlapping,61[/658](aa),127854627,127854444,186,127854355,127815682,c.-272,c.-89,TGA,NM_001114753.3|ENST00000373203.9:reverse,c.-87C>A,89,out_of_frame_(2),UTR5,not_overl…	NA	NA	NA	NA	NA	TGA; TGA; TGA; TGA; TGA; TGA; TGA	127854355; 127854355; 127854355; 127854355; 127854355; 127854355; 127854355	127815682; 127815682; 127815682; 127815682; 127815682; 127815682; 127815682	127854642; 127854627; 127854606; 127854537; 127854522; 127854498; 127854483	127854444; 127854444; 127854444; 127854444; 127854444; 127854444; 127854444	NA	NA	NA	c.-287; c.-272; c.-251; c.-182; c.-167; c.-143; c.-128	c.-89; c.-89; c.-89; c.-89; c.-89; c.-89; c.-89	.	.	.	.	.
chr9	127854441	C	A	ENST00000373203.9:reverse; ENST00000373203.9:reverse; ENST00000373203.9:reverse; ENST00000373203.9:reverse; ENST00000373203.9:reverse; ENST00000373203.9:reverse; ENST00000373203.9:reverse	NM_001114753.3; NM_001114753.3; NM_001114753.3; NM_001114753.3; NM_001114753.3; NM_001114753.3; NM_001114753.3	ENG	.	c.-86G>T; c.-86G>T; c.-86G>T; c.-86G>T; c.-86G>T; c.-86G>T; c.-86G>T	UTR5	new_uSTOP	out_of_frame_(2); out_of_frame_(2); out_of_frame_(2); out_of_frame_(2); out_of_frame_(2); out_of_frame_(2); out_of_frame_(2)	not_overlapping; not_overlapping; not_overlapping; not_overlapping; not_overlapping; not_overlapping; not_overlapping	0.101823708206687	67/658; 62/658; 55/658; 32/658; 27/658; 19/658; 14/658	204; 189; 168; 99; 84; 60; 45	NA	NA	NA	NA	NA	NA	ENST00000373203.9:reverse,c.-86G>T,86,out_of_frame_(2),UTR5,not_overlapping,67[/658](aa),127854642,127854441,204,127854355,127815682,c.-287,c.-86,TAG,NM_001114753.3|ENST00000373203.9:reverse,c.-86G>T,86,out_of_frame_(2),UTR5,not_overlapping,62[/658](aa),127854627,127854441,189,127854355,127815682,c.-272,c.-86,TAG,NM_001114753.3|ENST00000373203.9:reverse,c.-86G>T,86,out_of_frame_(2),UTR5,not_overl…	NA	NA	NA	NA	NA	TAG; TAG; TAG; TAG; TAG; TAG; TAG	127854355; 127854355; 127854355; 127854355; 127854355; 127854355; 127854355	127815682; 127815682; 127815682; 127815682; 127815682; 127815682; 127815682	127854642; 127854627; 127854606; 127854537; 127854522; 127854498; 127854483	127854441; 127854441; 127854441; 127854441; 127854441; 127854441; 127854441	NA	NA	NA	c.-287; c.-272; c.-251; c.-182; c.-167; c.-143; c.-128	c.-86; c.-86; c.-86; c.-86; c.-86; c.-86; c.-86	.	.	.	.	.
chr9	127854420	G	T	ENST00000373203.9:reverse; ENST00000373203.9:reverse; ENST00000373203.9:reverse	NM_001114753.3; NM_001114753.3; NM_001114753.3	ENG	.	c.-65C>A; c.-65C>A; c.-65C>A	UTR5	new_uSTOP	out_of_frame_(1); out_of_frame_(1); out_of_frame_(1)	not_overlapping; not_overlapping; not_overlapping	0.0379939209726444	25/658; 24/658; 14/658	78; 75; 45	NA	NA	NA	NA	NA	NA	ENST00000373203.9:reverse,c.-65C>A,67,out_of_frame_(1),UTR5,not_overlapping,25[/658](aa),127854497,127854422,78,127854355,127815682,c.-142,c.-67,TGA,NM_001114753.3|ENST00000373203.9:reverse,c.-65C>A,67,out_of_frame_(1),UTR5,not_overlapping,24[/658](aa),127854494,127854422,75,127854355,127815682,c.-139,c.-67,TGA,NM_001114753.3|ENST00000373203.9:reverse,c.-65C>A,67,out_of_frame_(1),UTR5,not_overlap…	NA	NA	NA	NA	NA	TGA; TGA; TGA	127854355; 127854355; 127854355	127815682; 127815682; 127815682	127854497; 127854494; 127854464	127854422; 127854422; 127854422	NA	NA	NA	c.-142; c.-139; c.-109	c.-67; c.-67; c.-67	.	.	.	.	.
chr9	127854412	G	A	ENST00000373203.9:reverse; ENST00000373203.9:reverse; ENST00000373203.9:reverse; ENST00000373203.9:reverse; ENST00000373203.9:reverse; ENST00000373203.9:reverse	NM_001114753.3; NM_001114753.3; NM_001114753.3; NM_001114753.3; NM_001114753.3; NM_001114753.3	ENG	.	c.-57C>T; c.-57C>T; c.-57C>T; c.-57C>T; c.-57C>T; c.-57C>T	UTR5	new_uSTOP	in_frame; in_frame; in_frame; in_frame; in_frame; in_frame	not_overlapping; not_overlapping; not_overlapping; not_overlapping; not_overlapping; not_overlapping	0.124620060790274	82/658; 63/658; 54/658; 41/658; 25/658; 11/658	249; 192; 165; 126; 78; 36	NA	NA	NA	NA	NA	NA	ENST00000373203.9:reverse,c.-57C>T,57,in_frame,UTR5,not_overlapping,82[/658](aa),127854658,127854412,249,127854355,127815682,c.-303,c.-57,TAG,NM_001114753.3|ENST00000373203.9:reverse,c.-57C>T,57,in_frame,UTR5,not_overlapping,63[/658](aa),127854601,127854412,192,127854355,127815682,c.-246,c.-57,TAG,NM_001114753.3|ENST00000373203.9:reverse,c.-57C>T,57,in_frame,UTR5,not_overlapping,54[/658](aa),1278…	NA	NA	NA	NA	NA	TAG; TAG; TAG; TAG; TAG; TAG	127854355; 127854355; 127854355; 127854355; 127854355; 127854355	127815682; 127815682; 127815682; 127815682; 127815682; 127815682	127854658; 127854601; 127854574; 127854535; 127854487; 127854445	127854412; 127854412; 127854412; 127854412; 127854412; 127854412	NA	NA	NA	c.-303; c.-246; c.-219; c.-180; c.-132; c.-90	c.-57; c.-57; c.-57; c.-57; c.-57; c.-57	.	.	.	.	.
chr9	127854404	G	T	ENST00000373203.9:reverse; ENST00000373203.9:reverse; ENST00000373203.9:reverse; ENST00000373203.9:reverse; ENST00000373203.9:reverse; ENST00000373203.9:reverse	NM_001114753.3; NM_001114753.3; NM_001114753.3; NM_001114753.3; NM_001114753.3; NM_001114753.3	ENG	.	c.-49C>A; c.-49C>A; c.-49C>A; c.-49C>A; c.-49C>A; c.-49C>A	UTR5	new_uSTOP	in_frame; in_frame; in_frame; in_frame; in_frame; in_frame	not_overlapping; not_overlapping; not_overlapping; not_overlapping; not_overlapping; not_overlapping	0.127659574468085	84/658; 65/658; 56/658; 43/658; 27/658; 13/658	255; 198; 171; 132; 84; 42	NA	NA	NA	NA	NA	NA	ENST00000373203.9:reverse,c.-49C>A,51,in_frame,UTR5,not_overlapping,84[/658](aa),127854658,127854406,255,127854355,127815682,c.-303,c.-51,TGA,NM_001114753.3|ENST00000373203.9:reverse,c.-49C>A,51,in_frame,UTR5,not_overlapping,65[/658](aa),127854601,127854406,198,127854355,127815682,c.-246,c.-51,TGA,NM_001114753.3|ENST00000373203.9:reverse,c.-49C>A,51,in_frame,UTR5,not_overlapping,56[/658](aa),1278…	NA	NA	NA	NA	NA	TGA; TGA; TGA; TGA; TGA; TGA	127854355; 127854355; 127854355; 127854355; 127854355; 127854355	127815682; 127815682; 127815682; 127815682; 127815682; 127815682	127854658; 127854601; 127854574; 127854535; 127854487; 127854445	127854406; 127854406; 127854406; 127854406; 127854406; 127854406	NA	NA	NA	c.-303; c.-246; c.-219; c.-180; c.-132; c.-90	c.-51; c.-51; c.-51; c.-51; c.-51; c.-51	.	.	.	.	.
chr9	127854399	C	A	ENST00000373203.9:reverse; ENST00000373203.9:reverse; ENST00000373203.9:reverse; ENST00000373203.9:reverse; ENST00000373203.9:reverse; ENST00000373203.9:reverse; ENST00000373203.9:reverse; ENST00000373203.9:reverse; ENST00000373203.9:reverse	NM_001114753.3; NM_001114753.3; NM_001114753.3; NM_001114753.3; NM_001114753.3; NM_001114753.3; NM_001114753.3; NM_001114753.3; NM_001114753.3	ENG	.	c.-44G>T; c.-44G>T; c.-44G>T; c.-44G>T; c.-44G>T; c.-44G>T; c.-44G>T; c.-44G>T; c.-44G>T	UTR5	new_uSTOP	out_of_frame_(2); out_of_frame_(2); out_of_frame_(2); out_of_frame_(2); out_of_frame_(2); out_of_frame_(2); out_of_frame_(2); out_of_frame_(2); out_of_frame_(2)	not_overlapping; not_overlapping; not_overlapping; not_overlapping; not_overlapping; not_overlapping; not_overlapping; not_overlapping; not_overlapping	0.123100303951368	81/658; 76/658; 69/658; 46/658; 41/658; 33/658; 28/658; 12/658; 8/658	246; 231; 210; 141; 126; 102; 87; 39; 27	NA	NA	NA	NA	NA	NA	ENST00000373203.9:reverse,c.-44G>T,44,out_of_frame_(2),UTR5,not_overlapping,81[/658](aa),127854642,127854399,246,127854355,127815682,c.-287,c.-44,TGA,NM_001114753.3|ENST00000373203.9:reverse,c.-44G>T,44,out_of_frame_(2),UTR5,not_overlapping,76[/658](aa),127854627,127854399,231,127854355,127815682,c.-272,c.-44,TGA,NM_001114753.3|ENST00000373203.9:reverse,c.-44G>T,44,out_of_frame_(2),UTR5,not_overl…	NA	NA	NA	NA	NA	TGA; TGA; TGA; TGA; TGA; TGA; TGA; TGA; TGA	127854355; 127854355; 127854355; 127854355; 127854355; 127854355; 127854355; 127854355; 127854355	127815682; 127815682; 127815682; 127815682; 127815682; 127815682; 127815682; 127815682; 127815682	127854642; 127854627; 127854606; 127854537; 127854522; 127854498; 127854483; 127854435; 127854423	127854399; 127854399; 127854399; 127854399; 127854399; 127854399; 127854399; 127854399; 127854399	NA	NA	NA	c.-287; c.-272; c.-251; c.-182; c.-167; c.-143; c.-128; c.-80; c.-68	c.-44; c.-44; c.-44; c.-44; c.-44; c.-44; c.-44; c.-44; c.-44	.	.	.	.	.
chr9	127854399	C	T	ENST00000373203.9:reverse; ENST00000373203.9:reverse; ENST00000373203.9:reverse; ENST00000373203.9:reverse; ENST00000373203.9:reverse; ENST00000373203.9:reverse	NM_001114753.3; NM_001114753.3; NM_001114753.3; NM_001114753.3; NM_001114753.3; NM_001114753.3	ENG	.	c.-44G>A; c.-44G>A; c.-44G>A; c.-44G>A; c.-44G>A; c.-44G>A	UTR5	new_uSTOP	in_frame; in_frame; in_frame; in_frame; in_frame; in_frame	not_overlapping; not_overlapping; not_overlapping; not_overlapping; not_overlapping; not_overlapping	0.130699088145897	86/658; 67/658; 58/658; 45/658; 29/658; 15/658	261; 204; 177; 138; 90; 48	NA	NA	NA	NA	NA	NA	ENST00000373203.9:reverse,c.-44G>A,45,in_frame,UTR5,not_overlapping,86[/658](aa),127854658,127854400,261,127854355,127815682,c.-303,c.-45,TAG,NM_001114753.3|ENST00000373203.9:reverse,c.-44G>A,45,in_frame,UTR5,not_overlapping,67[/658](aa),127854601,127854400,204,127854355,127815682,c.-246,c.-45,TAG,NM_001114753.3|ENST00000373203.9:reverse,c.-44G>A,45,in_frame,UTR5,not_overlapping,58[/658](aa),1278…	NA	NA	NA	NA	NA	TAG; TAG; TAG; TAG; TAG; TAG	127854355; 127854355; 127854355; 127854355; 127854355; 127854355	127815682; 127815682; 127815682; 127815682; 127815682; 127815682	127854658; 127854601; 127854574; 127854535; 127854487; 127854445	127854400; 127854400; 127854400; 127854400; 127854400; 127854400	NA	NA	NA	c.-303; c.-246; c.-219; c.-180; c.-132; c.-90	c.-45; c.-45; c.-45; c.-45; c.-45; c.-45	.	.	.	.	.
chr9	127854398	C	T	ENST00000373203.9:reverse; ENST00000373203.9:reverse; ENST00000373203.9:reverse; ENST00000373203.9:reverse; ENST00000373203.9:reverse; ENST00000373203.9:reverse	NM_001114753.3; NM_001114753.3; NM_001114753.3; NM_001114753.3; NM_001114753.3; NM_001114753.3	ENG	.	c.-43G>A; c.-43G>A; c.-43G>A; c.-43G>A; c.-43G>A; c.-43G>A	UTR5	new_uSTOP	in_frame; in_frame; in_frame; in_frame; in_frame; in_frame	not_overlapping; not_overlapping; not_overlapping; not_overlapping; not_overlapping; not_overlapping	0.130699088145897	86/658; 67/658; 58/658; 45/658; 29/658; 15/658	261; 204; 177; 138; 90; 48	NA	NA	NA	NA	NA	NA	ENST00000373203.9:reverse,c.-43G>A,45,in_frame,UTR5,not_overlapping,86[/658](aa),127854658,127854400,261,127854355,127815682,c.-303,c.-45,TGA,NM_001114753.3|ENST00000373203.9:reverse,c.-43G>A,45,in_frame,UTR5,not_overlapping,67[/658](aa),127854601,127854400,204,127854355,127815682,c.-246,c.-45,TGA,NM_001114753.3|ENST00000373203.9:reverse,c.-43G>A,45,in_frame,UTR5,not_overlapping,58[/658](aa),1278…	NA	NA	NA	NA	NA	TGA; TGA; TGA; TGA; TGA; TGA	127854355; 127854355; 127854355; 127854355; 127854355; 127854355	127815682; 127815682; 127815682; 127815682; 127815682; 127815682	127854658; 127854601; 127854574; 127854535; 127854487; 127854445	127854400; 127854400; 127854400; 127854400; 127854400; 127854400	NA	NA	NA	c.-303; c.-246; c.-219; c.-180; c.-132; c.-90	c.-45; c.-45; c.-45; c.-45; c.-45; c.-45	.	.	.	.	.
chr9	127854394	G	A	ENST00000373203.9:reverse; ENST00000373203.9:reverse; ENST00000373203.9:reverse; ENST00000373203.9:reverse; ENST00000373203.9:reverse; ENST00000373203.9:reverse	NM_001114753.3; NM_001114753.3; NM_001114753.3; NM_001114753.3; NM_001114753.3; NM_001114753.3	ENG	.	c.-39C>T; c.-39C>T; c.-39C>T; c.-39C>T; c.-39C>T; c.-39C>T	UTR5	new_uSTOP	in_frame; in_frame; in_frame; in_frame; in_frame; in_frame	not_overlapping; not_overlapping; not_overlapping; not_overlapping; not_overlapping; not_overlapping	0.133738601823708	88/658; 69/658; 60/658; 47/658; 31/658; 17/658	267; 210; 183; 144; 96; 54	NA	NA	NA	NA	NA	NA	ENST00000373203.9:reverse,c.-39C>T,39,in_frame,UTR5,not_overlapping,88[/658](aa),127854658,127854394,267,127854355,127815682,c.-303,c.-39,TAG,NM_001114753.3|ENST00000373203.9:reverse,c.-39C>T,39,in_frame,UTR5,not_overlapping,69[/658](aa),127854601,127854394,210,127854355,127815682,c.-246,c.-39,TAG,NM_001114753.3|ENST00000373203.9:reverse,c.-39C>T,39,in_frame,UTR5,not_overlapping,60[/658](aa),1278…	NA	NA	NA	NA	NA	TAG; TAG; TAG; TAG; TAG; TAG	127854355; 127854355; 127854355; 127854355; 127854355; 127854355	127815682; 127815682; 127815682; 127815682; 127815682; 127815682	127854658; 127854601; 127854574; 127854535; 127854487; 127854445	127854394; 127854394; 127854394; 127854394; 127854394; 127854394	NA	NA	NA	c.-303; c.-246; c.-219; c.-180; c.-132; c.-90	c.-39; c.-39; c.-39; c.-39; c.-39; c.-39	.	.	.	.	.
chr9	127854392	C	A	ENST00000373203.9:reverse; ENST00000373203.9:reverse; ENST00000373203.9:reverse; ENST00000373203.9:reverse; ENST00000373203.9:reverse	NM_001114753.3; NM_001114753.3; NM_001114753.3; NM_001114753.3; NM_001114753.3	ENG	.	c.-37G>T; c.-37G>T; c.-37G>T; c.-37G>T; c.-37G>T	UTR5	new_uSTOP	out_of_frame_(1); out_of_frame_(1); out_of_frame_(1); out_of_frame_(1); out_of_frame_(1)	not_overlapping; not_overlapping; not_overlapping; not_overlapping; not_overlapping	0.0531914893617021	35/658; 34/658; 24/658; 5/658; 3/658	108; 105; 75; 18; 12	NA	NA	NA	NA	NA	NA	ENST00000373203.9:reverse,c.-37G>T,37,out_of_frame_(1),UTR5,not_overlapping,35[/658](aa),127854497,127854392,108,127854355,127815682,c.-142,c.-37,TGA,NM_001114753.3|ENST00000373203.9:reverse,c.-37G>T,37,out_of_frame_(1),UTR5,not_overlapping,34[/658](aa),127854494,127854392,105,127854355,127815682,c.-139,c.-37,TGA,NM_001114753.3|ENST00000373203.9:reverse,c.-37G>T,37,out_of_frame_(1),UTR5,not_overl…	NA	NA	NA	NA	NA	TGA; TGA; TGA; TGA; TGA	127854355; 127854355; 127854355; 127854355; 127854355	127815682; 127815682; 127815682; 127815682; 127815682	127854497; 127854494; 127854464; 127854407; 127854401	127854392; 127854392; 127854392; 127854392; 127854392	NA	NA	NA	c.-142; c.-139; c.-109; c.-52; c.-46	c.-37; c.-37; c.-37; c.-37; c.-37	.	.	.	.	.
chr9	127854388	T	A	ENST00000373203.9:reverse; ENST00000373203.9:reverse; ENST00000373203.9:reverse; ENST00000373203.9:reverse; ENST00000373203.9:reverse; ENST00000373203.9:reverse	NM_001114753.3; NM_001114753.3; NM_001114753.3; NM_001114753.3; NM_001114753.3; NM_001114753.3	ENG	.	c.-33A>T; c.-33A>T; c.-33A>T; c.-33A>T; c.-33A>T; c.-33A>T	UTR5	new_uSTOP	in_frame; in_frame; in_frame; in_frame; in_frame; in_frame	not_overlapping; not_overlapping; not_overlapping; not_overlapping; not_overlapping; not_overlapping	0.13677811550152	90/658; 71/658; 62/658; 49/658; 33/658; 19/658	273; 216; 189; 150; 102; 60	NA	NA	NA	NA	NA	NA	ENST00000373203.9:reverse,c.-33A>T,33,in_frame,UTR5,not_overlapping,90[/658](aa),127854658,127854388,273,127854355,127815682,c.-303,c.-33,TAG,NM_001114753.3|ENST00000373203.9:reverse,c.-33A>T,33,in_frame,UTR5,not_overlapping,71[/658](aa),127854601,127854388,216,127854355,127815682,c.-246,c.-33,TAG,NM_001114753.3|ENST00000373203.9:reverse,c.-33A>T,33,in_frame,UTR5,not_overlapping,62[/658](aa),1278…	NA	NA	NA	NA	NA	TAG; TAG; TAG; TAG; TAG; TAG	127854355; 127854355; 127854355; 127854355; 127854355; 127854355	127815682; 127815682; 127815682; 127815682; 127815682; 127815682	127854658; 127854601; 127854574; 127854535; 127854487; 127854445	127854388; 127854388; 127854388; 127854388; 127854388; 127854388	NA	NA	NA	c.-303; c.-246; c.-219; c.-180; c.-132; c.-90	c.-33; c.-33; c.-33; c.-33; c.-33; c.-33	.	.	.	.	.
chr9	127854382	G	A	ENST00000373203.9:reverse; ENST00000373203.9:reverse; ENST00000373203.9:reverse; ENST00000373203.9:reverse; ENST00000373203.9:reverse; ENST00000373203.9:reverse; ENST00000373203.9:reverse	NM_001114753.3; NM_001114753.3; NM_001114753.3; NM_001114753.3; NM_001114753.3; NM_001114753.3; NM_001114753.3	ENG	.	c.-27C>T; c.-27C>T; c.-27C>T; c.-27C>T; c.-27C>T; c.-27C>T; c.-27C>T	UTR5	new_uSTOP	in_frame; in_frame; in_frame; in_frame; in_frame; in_frame; in_frame	not_overlapping; not_overlapping; not_overlapping; not_overlapping; not_overlapping; not_overlapping; not_overlapping	0.139817629179331	92/658; 73/658; 64/658; 51/658; 35/658; 21/658; 2/658	279; 222; 195; 156; 108; 66; 9	NA	NA	NA	NA	NA	NA	ENST00000373203.9:reverse,c.-27C>T,27,in_frame,UTR5,not_overlapping,92[/658](aa),127854658,127854382,279,127854355,127815682,c.-303,c.-27,TAG,NM_001114753.3|ENST00000373203.9:reverse,c.-27C>T,27,in_frame,UTR5,not_overlapping,73[/658](aa),127854601,127854382,222,127854355,127815682,c.-246,c.-27,TAG,NM_001114753.3|ENST00000373203.9:reverse,c.-27C>T,27,in_frame,UTR5,not_overlapping,64[/658](aa),1278…	NA	NA	NA	NA	NA	TAG; TAG; TAG; TAG; TAG; TAG; TAG	127854355; 127854355; 127854355; 127854355; 127854355; 127854355; 127854355	127815682; 127815682; 127815682; 127815682; 127815682; 127815682; 127815682	127854658; 127854601; 127854574; 127854535; 127854487; 127854445; 127854388	127854382; 127854382; 127854382; 127854382; 127854382; 127854382; 127854382	NA	NA	NA	c.-303; c.-246; c.-219; c.-180; c.-132; c.-90; c.-33	c.-27; c.-27; c.-27; c.-27; c.-27; c.-27; c.-27	.	.	.	.	.
chr9	127854375	G	A	ENST00000373203.9:reverse; ENST00000373203.9:reverse; ENST00000373203.9:reverse; ENST00000373203.9:reverse; ENST00000373203.9:reverse; ENST00000373203.9:reverse; ENST00000373203.9:reverse; ENST00000373203.9:reverse; ENST00000373203.9:reverse; ENST00000373203.9:reverse; ENST00000373203.9:reverse; ENST00000373203.9:reverse	NM_001114753.3; NM_001114753.3; NM_001114753.3; NM_001114753.3; NM_001114753.3; NM_001114753.3; NM_001114753.3; NM_001114753.3; NM_001114753.3; NM_001114753.3; NM_001114753.3; NM_001114753.3	ENG	.	c.-20C>T; c.-20C>T; c.-20C>T; c.-20C>T; c.-20C>T; c.-20C>T; c.-20C>T; c.-20C>T; c.-20C>T; c.-20C>T; c.-20C>T; c.-20C>T	UTR5	new_uSTOP	out_of_frame_(2); out_of_frame_(2); out_of_frame_(2); out_of_frame_(2); out_of_frame_(2); out_of_frame_(2); out_of_frame_(2); out_of_frame_(2); out_of_frame_(2); out_of_frame_(2); out_of_frame_(2); out_of_frame_(2)	not_overlapping; not_overlapping; not_overlapping; not_overlapping; not_overlapping; not_overlapping; not_overlapping; not_overlapping; not_overlapping; not_overlapping; not_overlapping; not_overlapping	0.135258358662614	89/658; 84/658; 77/658; 54/658; 49/658; 41/658; 36/658; 20/658; 16/658; 6/658; 5/658; 4/658	270; 255; 234; 165; 150; 126; 111; 63; 51; 21; 18; 15	NA	NA	NA	NA	NA	NA	ENST00000373203.9:reverse,c.-20C>T,20,out_of_frame_(2),UTR5,not_overlapping,89[/658](aa),127854642,127854375,270,127854355,127815682,c.-287,c.-20,TAG,NM_001114753.3|ENST00000373203.9:reverse,c.-20C>T,20,out_of_frame_(2),UTR5,not_overlapping,84[/658](aa),127854627,127854375,255,127854355,127815682,c.-272,c.-20,TAG,NM_001114753.3|ENST00000373203.9:reverse,c.-20C>T,20,out_of_frame_(2),UTR5,not_overl…	NA	NA	NA	NA	NA	TAG; TAG; TAG; TAG; TAG; TAG; TAG; TAG; TAG; TAG; TAG; TAG	127854355; 127854355; 127854355; 127854355; 127854355; 127854355; 127854355; 127854355; 127854355; 127854355; 127854355; 127854355	127815682; 127815682; 127815682; 127815682; 127815682; 127815682; 127815682; 127815682; 127815682; 127815682; 127815682; 127815682	127854642; 127854627; 127854606; 127854537; 127854522; 127854498; 127854483; 127854435; 127854423; 127854393; 127854390; 127854387	127854375; 127854375; 127854375; 127854375; 127854375; 127854375; 127854375; 127854375; 127854375; 127854375; 127854375; 127854375	NA	NA	NA	c.-287; c.-272; c.-251; c.-182; c.-167; c.-143; c.-128; c.-80; c.-68; c.-38; c.-35; c.-32	c.-20; c.-20; c.-20; c.-20; c.-20; c.-20; c.-20; c.-20; c.-20; c.-20; c.-20; c.-20	.	.	.	.	.
chr9	127854362	C	A	ENST00000373203.9:reverse	NM_001114753.3	ENG	.	c.-7G>T	UTR5	new_uSTOP	out_of_frame_(1)	not_overlapping	0.0060790273556231	4/658	15	NA	NA	NA	NA	NA	NA	ENST00000373203.9:reverse,c.-7G>T,7,out_of_frame_(1),UTR5,not_overlapping,4[/658](aa),127854374,127854362,15,127854355,127815682,c.-19,c.-7,TGA,NM_001114753.3	NA	NA	NA	NA	NA	TGA	127854355	127815682	127854374	127854362	NA	NA	NA	c.-19	c.-7	.	.	.	.	.
chr9	127854362	C	T	ENST00000373203.9:reverse; ENST00000373203.9:reverse; ENST00000373203.9:reverse; ENST00000373203.9:reverse; ENST00000373203.9:reverse; ENST00000373203.9:reverse; ENST00000373203.9:reverse; ENST00000373203.9:reverse; ENST00000373203.9:reverse; ENST00000373203.9:reverse; ENST00000373203.9:reverse; ENST00000373203.9:reverse; ENST00000373203.9:reverse	NM_001114753.3; NM_001114753.3; NM_001114753.3; NM_001114753.3; NM_001114753.3; NM_001114753.3; NM_001114753.3; NM_001114753.3; NM_001114753.3; NM_001114753.3; NM_001114753.3; NM_001114753.3; NM_001114753.3	ENG	.	c.-7G>A; c.-7G>A; c.-7G>A; c.-7G>A; c.-7G>A; c.-7G>A; c.-7G>A; c.-7G>A; c.-7G>A; c.-7G>A; c.-7G>A; c.-7G>A; c.-7G>A	UTR5	new_uSTOP	out_of_frame_(2); out_of_frame_(2); out_of_frame_(2); out_of_frame_(2); out_of_frame_(2); out_of_frame_(2); out_of_frame_(2); out_of_frame_(2); out_of_frame_(2); out_of_frame_(2); out_of_frame_(2); out_of_frame_(2); out_of_frame_(2)	not_overlapping; not_overlapping; not_overlapping; not_overlapping; not_overlapping; not_overlapping; not_overlapping; not_overlapping; not_overlapping; not_overlapping; not_overlapping; not_overlapping; not_overlapping	0.141337386018237	93/658; 88/658; 81/658; 58/658; 53/658; 45/658; 40/658; 24/658; 20/658; 10/658; 9/658; 8/658; 1/658	282; 267; 246; 177; 162; 138; 123; 75; 63; 33; 30; 27; 6	NA	NA	NA	NA	NA	NA	ENST00000373203.9:reverse,c.-7G>A,8,out_of_frame_(2),UTR5,not_overlapping,93[/658](aa),127854642,127854363,282,127854355,127815682,c.-287,c.-8,TAG,NM_001114753.3|ENST00000373203.9:reverse,c.-7G>A,8,out_of_frame_(2),UTR5,not_overlapping,88[/658](aa),127854627,127854363,267,127854355,127815682,c.-272,c.-8,TAG,NM_001114753.3|ENST00000373203.9:reverse,c.-7G>A,8,out_of_frame_(2),UTR5,not_overlapping,8…	NA	NA	NA	NA	NA	TAG; TAG; TAG; TAG; TAG; TAG; TAG; TAG; TAG; TAG; TAG; TAG; TAG	127854355; 127854355; 127854355; 127854355; 127854355; 127854355; 127854355; 127854355; 127854355; 127854355; 127854355; 127854355; 127854355	127815682; 127815682; 127815682; 127815682; 127815682; 127815682; 127815682; 127815682; 127815682; 127815682; 127815682; 127815682; 127815682	127854642; 127854627; 127854606; 127854537; 127854522; 127854498; 127854483; 127854435; 127854423; 127854393; 127854390; 127854387; 127854366	127854363; 127854363; 127854363; 127854363; 127854363; 127854363; 127854363; 127854363; 127854363; 127854363; 127854363; 127854363; 127854363	NA	NA	NA	c.-287; c.-272; c.-251; c.-182; c.-167; c.-143; c.-128; c.-80; c.-68; c.-38; c.-35; c.-32; c.-11	c.-8; c.-8; c.-8; c.-8; c.-8; c.-8; c.-8; c.-8; c.-8; c.-8; c.-8; c.-8; c.-8	.	.	.	.	.
chr9	127854361	C	T	ENST00000373203.9:reverse; ENST00000373203.9:reverse; ENST00000373203.9:reverse; ENST00000373203.9:reverse; ENST00000373203.9:reverse; ENST00000373203.9:reverse; ENST00000373203.9:reverse; ENST00000373203.9:reverse; ENST00000373203.9:reverse; ENST00000373203.9:reverse; ENST00000373203.9:reverse; ENST00000373203.9:reverse; ENST00000373203.9:reverse	NM_001114753.3; NM_001114753.3; NM_001114753.3; NM_001114753.3; NM_001114753.3; NM_001114753.3; NM_001114753.3; NM_001114753.3; NM_001114753.3; NM_001114753.3; NM_001114753.3; NM_001114753.3; NM_001114753.3	ENG	.	c.-6G>A; c.-6G>A; c.-6G>A; c.-6G>A; c.-6G>A; c.-6G>A; c.-6G>A; c.-6G>A; c.-6G>A; c.-6G>A; c.-6G>A; c.-6G>A; c.-6G>A	UTR5	new_uSTOP	out_of_frame_(2); out_of_frame_(2); out_of_frame_(2); out_of_frame_(2); out_of_frame_(2); out_of_frame_(2); out_of_frame_(2); out_of_frame_(2); out_of_frame_(2); out_of_frame_(2); out_of_frame_(2); out_of_frame_(2); out_of_frame_(2)	not_overlapping; not_overlapping; not_overlapping; not_overlapping; not_overlapping; not_overlapping; not_overlapping; not_overlapping; not_overlapping; not_overlapping; not_overlapping; not_overlapping; not_overlapping	0.141337386018237	93/658; 88/658; 81/658; 58/658; 53/658; 45/658; 40/658; 24/658; 20/658; 10/658; 9/658; 8/658; 1/658	282; 267; 246; 177; 162; 138; 123; 75; 63; 33; 30; 27; 6	NA	NA	NA	NA	NA	NA	ENST00000373203.9:reverse,c.-6G>A,8,out_of_frame_(2),UTR5,not_overlapping,93[/658](aa),127854642,127854363,282,127854355,127815682,c.-287,c.-8,TGA,NM_001114753.3|ENST00000373203.9:reverse,c.-6G>A,8,out_of_frame_(2),UTR5,not_overlapping,88[/658](aa),127854627,127854363,267,127854355,127815682,c.-272,c.-8,TGA,NM_001114753.3|ENST00000373203.9:reverse,c.-6G>A,8,out_of_frame_(2),UTR5,not_overlapping,8…	NA	NA	NA	NA	NA	TGA; TGA; TGA; TGA; TGA; TGA; TGA; TGA; TGA; TGA; TGA; TGA; TGA	127854355; 127854355; 127854355; 127854355; 127854355; 127854355; 127854355; 127854355; 127854355; 127854355; 127854355; 127854355; 127854355	127815682; 127815682; 127815682; 127815682; 127815682; 127815682; 127815682; 127815682; 127815682; 127815682; 127815682; 127815682; 127815682	127854642; 127854627; 127854606; 127854537; 127854522; 127854498; 127854483; 127854435; 127854423; 127854393; 127854390; 127854387; 127854366	127854363; 127854363; 127854363; 127854363; 127854363; 127854363; 127854363; 127854363; 127854363; 127854363; 127854363; 127854363; 127854363	NA	NA	NA	c.-287; c.-272; c.-251; c.-182; c.-167; c.-143; c.-128; c.-80; c.-68; c.-38; c.-35; c.-32; c.-11	c.-8; c.-8; c.-8; c.-8; c.-8; c.-8; c.-8; c.-8; c.-8; c.-8; c.-8; c.-8; c.-8	.	.	.	.	.
chr9	127854359	G	A	ENST00000373203.9:reverse	NM_001114753.3	ENG	.	c.-4C>T	UTR5	new_uSTOP	out_of_frame_(1)	not_overlapping	0.00759878419452888	5/658	18	NA	NA	NA	NA	NA	NA	ENST00000373203.9:reverse,c.-4C>T,4,out_of_frame_(1),UTR5,not_overlapping,5[/658](aa),127854374,127854359,18,127854355,127815682,c.-19,c.-4,TAG,NM_001114753.3	NA	NA	NA	NA	NA	TAG	127854355	127815682	127854374	127854359	NA	NA	NA	c.-19	c.-4	.	.	.	.	.

## Sheet: Supp.Table 3_mult. consequences
Supplementary Table 3. Single nucleotide variants with multiple consequences on upstream Open Reading Frames in the 5'UTR of ENG (ENST00000373203.9; NM_001114753.3).
Variant	uTIS	New_Stop	uStop	rsID	ClinVar
c.-297C>T	ATA-uORF (c.-166)	Yes (TAG) ; upstream in frame TIS : c.-303	No	na	na
c.-290C>G	TTG-uORF (c.-166)	Yes (TGA) ; upstream in frame TIS : c.-303	No	na	na
c.-278G>A	AGG-uoORF (c.125)	Yes (TAG) ; upstream in frame TIS : c.-303	No	na	na
c.-277G>A	AGG-uORF (c.-166)	Yes (TGA) ; upstream in frame TIS : c.-303	No	na	na
c.-271G>T	ATG-uoORF (c.125)*	Yes (TGA) ; upstream in frame TIS : c.-289; c.-280	No	na	na
c.-265C>A	ATG-uORF (c.-166)	Yes (TGA) ; upstream in frame TIS : c.-303	No	na	na
c.-262C>A	ATG-uORF (c.-166)	Yes (TGA) ; upstream in frame TIS : c.-303	No	na	na
c.-258C>G	GTG-uoORF (c.125)	Yes (TGA) ; upstream in frame TIS : c.-289; c.-280; c.-268; c.-265; c.-262	No	na	na
c.-245T>A	AGG-uoORF (c.125) ATA-uORF (c.-166)	Yes (TAG) ; upstream in frame TIS : c.-303	No	na	na
c.-244G>T	TTG-uoORF (c.125)	Yes (TGA) ; upstream in frame TIS : c.-289; c.-280; c.-268; c.-265; c.-262; c.-256; c.-247	No	na	na
c.-243G>A	AAG-eCDS (c.1975)	Yes (TGA) ; upstream in frame TIS : c.-287; c.-272; c.-251	No	na	na
c.-213C>A	AGG-eCDS (c.1975)	Yes (TAG) ; upstream in frame TIS : c.-289; c.-280; c.-268; c.-265; c.-262; c.-256; c.-247	No	na	na
c.-212G>T	CTG-eCDS (c.1975)	Yes (TGA) ; upstream in frame TIS : c.-287; c.-272; c.-251	No	na	na
c.-209C>T	ATA-eCDS (c.1975)	Yes (TAG) ; upstream in frame TIS : c.-287; c.-272; c.-251	No	na	na
c.-158C>A	AGG-uoORF (c.125)	Yes (TAG) ; upstream in frame TIS : c.-303; c.-246; c.-219; c.-180	No	na	na
c.-144G>T	ATA-uORF (c.-34)	Yes (TAA) ; upstream in frame TIS : c.-303; c.-246; c.-219; c.-180	No	na	na
c.-137G>T	TTG-eCDS (c.1975)	Yes (TGA) ; upstream in frame TIS : c.-287; c.-272; c.-251; c.-182; c.-167; c.-143	No	na	na
c.-136G>A	AAG-uORF (c.-34)	Yes (TGA) ; upstream in frame TIS : c.-303; c.-246; c.-219; c.-180	No	na	na
c.-130G>T	GTG-uoORF (c.125)	Yes (TGA) ; upstream in frame TIS : c.-142; c.-139	No	na	na
c.-106C>A	ATC-uORF (c.-34)	Yes (TGA) ; upstream in frame TIS : c.-303; c.-246; c.-219; c.-180; c.-132	No	na	na
c.-99C>A	AGG-eCDS (c.1975)	Yes (TAG) ; upstream in frame TIS : c.-142; c.-139; c.-109	No	na	na
c.-87C>T	GTG-uORF (c.-34)	Yes (TGA) ; upstream in frame TIS : c.-303; c.-246; c.-219; c.-180; c.-132; c.-90	No	rs964321855	na
c.-44G>T	TTG-eCDS (c.1975)	Yes (TGA) ; upstream in frame TIS : c.-287; c.-272; c.-251; c.-182; c.-167; c.-143; c.-128; c.-80; c.-68	No	na	na
c.-39C>T	ATA-uORF (c.-34)	Yes (TAG) ; upstream in frame TIS : c.-303; c.-246; c.-219; c.-180; c.-132; c.-90	No	na	na
c.-37G>T	ATG-uoORF (c.125)**	Yes (TGA) ; upstream in frame TIS : c.-142; c.-139; c.-109; c.-52; c.-46	No	na	na
c.-20C>T	ATA-eCDS (c.1975)	Yes (TAG) ; upstream in frame TIS : c.-287; c.-272; c.-251; c.-182; c.-167; c.-143; c.-128; c.-80; c.-68; c.-38; c.-35; c.-32	No	na	na
c.-7G>T	TTG-uoORF (c.125)	Yes (TGA) ; upstream in frame TIS : c.-19	No	na	na
c.-4C>T	ATA-uoORF (c.125)	Yes (TAG) ; upstream in frame TIS : c.-19	No	na	na
c.-32A>T	ATG-eCDS (c.1975)	No	Yes (uTIS : c.-142; c.-139; c.-109; c.-52; c.-46) ==> uStop = c.90	na	na
c.-32A>C	ACG-eCDS (c.1975)	No	Yes (uTIS : c.-142; c.-139; c.-109; c.-52; c.-46) ==> uStop = c.90	na	na
c.-33A>T	ATT-uoORF (c.125)	Yes (TAG) ; upstream in frame TIS : c.-303; c.-246; c.-219; c.-180; c.-132; c.-90	Yes (uTIS : c.-142; c.-139; c.-109; c.-52; c.-46) ==> uStop = c.90	na	na
	Existing natural uTIS reported in databases are bolded
	Anlayzed during this study
	*, Kozak Strong
	**, Kozak Weak

## Sheet: Supp. Table 4_ClinVar uTIS
Supplementary Table 4. Single nucleotide variants creating upstream Translation Initiation Sites (uTIS) in the 5'UTR of ENG (ENST00000373203.9; NM_001114753.3) and reported in ClinVar https://www.ncbi.nlm.nih.gov/clinvar/.
Variants were classified below according the type of the generated upstream Open Reading Frame.
upORF type	rsID	Variant	ORF_size	uTIS_sequence	uStop_sequence	Kozak_sequence	Kozak_score	Kozak_strength	PreTIS score	TIS_c_pos	STOP_c_pos	gnomad312_AF	CLNDN	CLNSIG
uoORF	rs914868382	c.-249C>A	378	ATA	TGA	TGTCACTGCCATACATTGGAGCC	0.670246480737056	moderate	na	c.-251	c.125	6.57e-06	Telangiectasia,_hereditary_hemorrhagic,_type_1	Uncertain_significance
	rs961480381	c.-188G>A	315	ACG	TGA	GCCCAGCCCCACGTCCCTGTGTC	0.602171359597071	weak	0.29	c.-188	c.125	0.0002	Telangiectasia,_hereditary_hemorrhagic,_type_1|not_provided	Conflicting_interpretations_of_pathogenicity
	.	c.-154C>T	282	CTG	TGA	GACCCCTCGGCTGCCACCCCAGA	0.503873235618528	weak	0.59	c.-155	c.125	3.942e-05	Hereditary_hemorrhagic_telangiectasia	Uncertain_significance
	.	c.-142A>T*	270	ATG	TGA	GCCACCCCAGATGGCTGGAGCAG	0.656161973468657	moderate	0.84	c.-143	c.125	.	Telangiectasia,_hereditary_hemorrhagic,_type_1	Pathogenic
	rs1060501408	c.-127C>T*	255	ATG	TGA	TGGAGCAGGGATGCCGTCGCTCC	0.690140842771276	moderate	0.84	c.-128	c.125	.	Telangiectasia,_hereditary_hemorrhagic,_type_1|Hereditary_hemorrhagic_telangiectasia|Cardiovascular_phenotype|not_provided	Pathogenic/Likely_pathogenic
	.	c.-112C>T	240	CTG	TGA	GTCGCTCCGGCTGCCTGCTCCCC	0.538028168019044	weak	0.56	c.-113	c.125	1.314e-05	Hereditary_hemorrhagic_telangiectasia	Uncertain_significance
	rs923040659	c.-98G>A	225	AGG	TGA	TGCTCCCCTCAGGTCCCCGTGCG	0.605164317190902	weak	0.01	c.-98	c.125	2.629e-05	Telangiectasia,_hereditary_hemorrhagic,_type_1	Likely_benign
	.	c.-91C>T	219	CTG	TGA	CCTCGGGTCCCTGTGCGAGCCCA	0.579460089686636	weak	0.44	c.-92	c.125	1.971e-05	Hereditary_hemorrhagic_telangiectasia	Uncertain_significance
	.	c.-79C>T*	207	ATG	TGA	GTGCGAGCCCATGCCGGCCCCGG	0.650704220814124	weak	0.67	c.-80	c.125	.	Hereditary_hemorrhagic_telangiectasia|not_provided	Uncertain_significance
	rs943786398	c.-76C>T*	204	CTG	TGA	CGAGCCCACGCTGGCCCCGGTGC	0.873239437260464	strong	0.93	c.-77	c.125	6.569e-05	Hereditary_hemorrhagic_telangiectasia	Uncertain_significance
	.	c.-46C>T**	174	ATT	TGA	CAGCCCTGCCATTGGACACAGGA	0.763028166145804	strong	0.6	c.-47	c.125	.	Hereditary_hemorrhagic_telangiectasia	Uncertain_significance
	rs562538400	c.-70C>T	198	CTG	TGA	CACGCCGGCCCTGGTGCCCGCCC	0.819718305358857	strong	0.65	c.-71	c.125	0.0003	Hereditary_hemorrhagic_telangiectasia|not_provided	Benign/Likely_benign
	rs769883395	c.-24C>T	117	GTG	TGA	ATAAGGCCCAGTGCACAGGCCCC	0.515086395996842	weak	0.64	c.-25	c.90	1.971e-05	Hereditary_hemorrhagic_telangiectasia	Uncertain_significance
	rs756994701	c.-10C>T*	138	ATG	TGA	ACAGGCCCCCATGTGGACAGCAT	0.607398596759555	weak	0.85	c.-11	c.125	6.57e-06	Hereditary_hemorrhagic_telangiectasia|Cardiovascular_phenotype|not_provided	Conflicting_interpretations_of_pathogenicity
uORF	rs955866378	c.-227C>G	66	CTG	TGA	CCAGCACCCCCTGCCCGCCCATC	0.613908446311347	weak	na	c.-229	c.-166	0.0001	Telangiectasia,_hereditary_hemorrhagic,_type_1	Uncertain_significance
	.	c.-141G>T	111	ATG	TAA	CCACCCCAGAATGCTGGAGCAGG	0.687147890529558	moderate	0.63	c.-142	c.-34	.	Hereditary_hemorrhagic_telangiectasia	Uncertain_significance
	.	c.-99C>T	69	TTG	TAA	CCTGCTCCCCTTGGGTCCCCGTG	0.684330979977287	moderate	0.43	c.-100	c.-34	1.314e-05	Hereditary_hemorrhagic_telangiectasia	Uncertain_significance
	rs886063476	c.-63C>T	33	CTG	TAA	GCCCCGGTGCCTGCCCGCAGCCC	0.56883802733416	weak	0.29	c.-64	c.-34	0.0002	Telangiectasia,_hereditary_hemorrhagic,_type_1	Uncertain_significance
eCDS	rs886063478	c.-246T>C	2223	CTG	TAG	CTGCCATCCACTGGAGCCCAGCA	0.596830984125174	moderate	na	c.-246	c.1975	0.0002	Telangiectasia,_hereditary_hemorrhagic,_type_1|Juvenile_Polyposis	Uncertain_significance
	rs569618819	c.-186G>A	2163	ATC	TAG	CCAGCCCCGCATCCCTGTGTCCA	0.59683098680123	weak	0.43**	c.-186	c.1975	0.0008	Telangiectasia,_hereditary_hemorrhagic,_type_1|Hereditary_hemorrhagic_telangiectasia	Benign/Likely_benign
	rs41470844	c.-158C>T	2136	TTG	TAG	TCCTGACCCCTTGGCCGCCACCC	0.740669009050883	moderate	0.73	c.-159	c.1975	0.0007	Telangiectasia,_hereditary_hemorrhagic,_type_1	Likely_benign
	rs548024640	c.-123G>A	2100	ATC	TAG	CAGGGACGCCATCGCTCCGGCCG	0.884507036652649	strong	0.66	c.-123	c.1975	0.0001	Hereditary_hemorrhagic_telangiectasia	Uncertain_significance
	.	c.-94C>G	2073	GTG	TAG	CTCCCCTCGGGTGCCCGTGCGAG	0.520950700480758	weak	0.33	c.-96	c.1975	.	Hereditary_hemorrhagic_telangiectasia	Uncertain_significance
	rs768083796	c.-90G>C	2067	CTG	TAG	TCGGGTCCCCCTGCGAGCCCACG	0.599823939042948	weak	0.48	c.-90	c.1975	4.6e-05	Telangiectasia,_hereditary_hemorrhagic,_type_1	Uncertain_significance
	rs1003149967	c.-59C>T	2037	CTG	TAG	CGGTGCCCGCCTGCAGCCCTGCC	0.619718309105336	weak	0.46	c.-60	c.1975	1.971e-05	Telangiectasia,_hereditary_hemorrhagic,_type_1	Uncertain_significance
	rs368423516	c.-9G>A*	1986	ATG	TAG	AGGCCCCCACATGGACAGCATGG	0.71508639492642	moderate	0.96	c.-9	c.1975	0.0004	Telangiectasia,_hereditary_hemorrhagic,_type_1|Hereditary_hemorrhagic_telangiectasia|Cardiovascular_phenotype|not_provided	Conflicting_interpretations_of_pathogenicity
	.	c.-2G>T	1980	ATC	TAG	CCACGTGGACATCATGGACCGCG	0.746302811423031	moderate	0.32	c.-3	c.1975	1.314e-05	Hereditary_hemorrhagic_telangiectasia	Uncertain_significance
		*, variants experimentally tested in our previous or current studies
		**, double uTIS creation (see Supp. Table 6)

## Sheet: Supp. Table 5_GnomAD uTIS
Supplementary Table 5. Single nucleotide variants creating upstream Translation Initiation Sites (uTIS) in the 5'UTR of ENG (ENST00000373203.9; NM_001114753.3), extracted from MORFEEdb and reported in GnomAD V4 0.0 database (https://gnomad.broadinstitute.org/) .
Variants were classified below according the type of the generated upstream Open Reading Frame.
upORF type	rsID	Variant	ORF_size	uTIS_sequence	uStop_sequence	Kozak_sequence	Kozak_score	Kozak_strength	PreTIS score	TIS_c_pos	STOP_c_pos	gnomad312_AF
uoORF	rs1057468665	c.-291T>G	420	CTG	TGA	ATACCACAGCCTGCATCTGCGCC	0.726760562204325	moderate	na	c.-293	c.125	3.286e-05
	rs527858227	c.-121C>T	249	TTG	TGA	AGGGACGCCGTTGCTCCGGCCGC	0.507042250958143	weak	0.46	c.-122	c.125	.
	rs769883395	c.-24C>T	117	GTG	TGA	ATAAGGCCCAGTGCACAGGCCCC	0.515086395996842	weak	0.64	c.-25	c.90	1.971e-05
	rs769883395	c.-24C>G	153	AGG	TGA	GATAAGGCCCAGGGCACAGGCCC	0.661971828234477	moderate	0.25	c.-26	c.125	.
uORF	rs965106604	c.-213C>T	51	TTG	TGA	CGCCCATCCTTTGGACAGCAACT	0.554346954856097	moderate	na	c.-214	c.-166	2.629e-05
	rs1044390093	c.-189C>T	27	CTG	TGA	CAGCCCAGCCCTGCGTCCCTGTG	0.690140842771276	moderate	0.8	c.-190	c.-166	1.314e-05
	rs898517871	c.-176C>G	15	GTG	TGA	GCGTCCCTGTGTGCACTTCTCCT	0.422359157630133	weak	0.34	c.-178	c.-166	.
	rs964321855	c.-87C>T	57	GTG	TAA	GGGTCCCCGTGTGAGCCCACGCC	0.467605631677048	weak	0.53	c.-88	c.-34	6.569e-06
eCDS	rs983186962	c.-284C>T	2262	GTG	TAG	GCCTTCATCTGTGCCCTGGGGCC	0.453345072014977	weak	na	c.-285	c.1975	1.314e-05
	rs747984759	c.-233C>T	2211	ATC	TAG	GGAGCCCAGCATCCCCTCCCCGC	0.783098591277921	moderate	na	c.-234	c.1975	.
	rs1027345417	c.-203C>T	2181	ATT	TAG	TCGGACAGCAATTCCAGCCCAGC	0.63644366382811	moderate	0.46	c.-204	c.1975	6.572e-06
	rs548024640	c.-123G>A	2100	ATC	TAG	CAGGGACGCCATCGCTCCGGCCG	0.884507036652649	strong	0.66	c.-123	c.1975	0.0001
	rs768083796	c.-90G>A	2067	ATG	TAG	TCGGGTCCCCATGCGAGCCCACG	0.599823939042948	weak	0.62	c.-90	c.1975	1.971e-05
	rs775506292	c.-38A>T	2016	CTG	TAG	CCACTGGACACTGGATAAGGCCC	0.757163864337946	strong	0.95	c.-39	c.1975	.

## Sheet: Supp. Table 6_Double uTIS
Supplementary Table 6. Single nucleotide variants creating 2 upstream Translation Initiation Sites (uTIS) in the 5'UTR of ENG (ENST00000373203.9; NM_001114753.3).
Variant	Created uTIS	uTIS Position	Associated uStop	KSS score	Kozak Strength	upORF type
c.-287C>G	ATG	c.-289	c.-166	0.593896709770548	moderate	uORF
	GTG	c.-287	c.125	0.419542252429974	weak	uoORF
c.-287C>T	ATT	c.-289	c.-166	0.593896709770548	moderate	uORF
	TTG	c.-287	c.125	0.419542252429974	weak	uoORF
c.-287C>A	ATA	c.-289	c.-166	0.593896709770548	moderate	uORF
	ATG	c.-287	c.125	0.419542252429974	weak	uoORF
c.-268C>T	ATT	c.-269	c.125	0.858978872246281	strong	uoORF
	TTG	c.-268	c.-166	0.588732394720492	moderate	uORF
c.-256C>T	ATT	c.-257	c.125	0.782515965646416	moderate	uoORF
	TTG	c.-256	c.-166	0.484330983723765	weak	uORF
c.-245T>A	ATA	c.-247	c.-166	0.658978870640647	moderate	uORF
	AGG	c.-245	c.125	0.467605631677048	weak	uoORF
c.-131G>A	AAG	c.-132	c.1975	0.864788729688157	strong	eCDS
	AGG	c.-131	c.125	0.715492957460028	moderate	uoORF
c.-46C>T	TTG	c.-46	c.-34	0.599593436931181	weak	uORF
	ATT	c.-47	c.125	0.763028166145804	moderate	uoORF
	Anlayzed in this study

## Sheet: Supp. Table 7_Raw data upORFs
Supplementary Table 7. Raw data associated with main Figures 2 and 3 and Supplemnetal Figure 3.
Figure 2c
Experiment number	WT	c.-287C>A	c.-271G>T	c.-249C>G	c.-182C>A	c.-167C>A	c.-37G>T	c.-33A>G	c.-31G>T
1	100	61.0677441510749	4.71108754602723	8.31076168088549	11.8547817364775	76.6341021715978	229.41363282865	0	40.7001439335044
2	100	114.923419449351	9.48639606979794	5.87322173705669	4.38016542733613	6.78083020459286	251.036583385347	0	12.2517110858146
3	100	115.326827083491	18.6981778990021	7.45512181792953	16.0147097072803	44.4889946057161	237.617326772238	24.9623818518435	31.4865238637786
4	100	73.710436936547	8.38153136406014	12.235315153024	14.1171983751129	26.0796023255203	102.949755025558	3.9583520538891	13.5120994318869
5	100	109.065697668581	12.4434576960934	12.2243621363907	16.9261509230132	37.5348008785098	94.8234756890392	11.4964509810897	28.8562701167578
Figure 3b
Experiment number	WT	c.-76C>T
1	100	50.33885
2	100	50.06867
3	100	72.8559
4	100	73.66775
5	100	67.71626
6	100	38.32654
7	100	181.5157
8	100	57.18
9	100	68.7
10	100	111.376
11	100	51.4208
12	100	92.85886
Supp. Figure 3a
Experiment number	WT	c.-37C>T
1	100	229.4136
2	100	251.0366
3	100	237.6173
4	100	102.9498
5	100	94.82348
6	100	110.6332
7	100	64.35314
8	100	128.2771
9	100	132.5233
Supp. Figure 3b
Experiment number	WT	c.-287C>A	c.-271G>T	c.-249C>G	c.-182C>A	c.-167C>A	c.-37G>T	c.-33A>G	c.-31G>T
1	100	71.1603540922902	58.3708654741664	77.2518739634565	56.233849677371	162.086439009507	151.085848406365	23.7261405057635	247.668935452109
2	100	73.9129055922275	97.5360458456386	163.544133671788	154.377520781819	32.0629450293969	232.41377474728	103.076125758524	175.529084742924
3	100	110.358874891908	123.533575105692	91.5242650960509	133.135332842165	94.0178229767083	174.853989708589	219.744571664923	261.784208853751
4	100	83.8660271886771	65.1571223410856	71.1830318861968	85.398610420815	85.1704868067457	102.674488186452	92.0643254010708	70.6410671744401
5	100	91.7673844885621	77.9266416124189	78.3683234312151	84.0262309290888	102.125343961579	107.393113923217	128.611566713861	121.743304807102
Supp. Figure 3c
Experiment number	WT	c.-76C>T
1	100	70.4
2	100	129.1029
3	100	119.5177
4	100	72.53209
5	100	102.3621
6	100	78.08036
7	100	189.5014
8	100	151.06
9	100	279.34
10	100	105.3628
11	100	130.2519
12	100	146.0387

## Sheet: Supp. Table 8_Clinical data
	Supplementary Table 8. Clinical data for ENG 5’UTR variants identified in HHT patients and experimentally analyzed in this study
	Position1	Created uTIS	Patients (sex)	Associated symptoms	Familial data
	c.-76C>T	uCUG	Patient 1 (F)	2 DVT, stroke, recurrent E during childhood, T (1 on lips and few on skin)	NA
			Patient 2 (F)	2 PAVM, E (once a month), ≤ 2 T (face and hands)	Asymptomatic father (age: 72)
	c.-33A>G	uAUG	Patient 3 (F)	PAVM, recurrent E, numerous T (fingers and lips)	NA
	1 variant position in the L-ENG NM_001114753.3 transcript (c.1 corresponds to the A of the main AUG)
	uTIS, upstream Translation Initiation site; F, female; NA: Not available; DVT, deep venous thrombosis. E, epistaxis; T, telangiectasia; PAVM, pulmonary arteriovenous malformation

## Sheet: Supp. Table 9_Primers
Supplementary Table 9. Details about primers used in this study. Restriction sites in cloning primers are underlined. Variations in directed mutagenesis (DM) primers are in lowercase.
Technique	Variant	Primer name	Primer sequence (5’-3’)
Cloning	*	ENG-Iso1-WT-BamHI-F	tagtggatccATACCACAGCCTTCATCTGCGC
Cloning	**	ENG_SacII-R	CGTGCCGCGGTCCATGCTG
Cloning	***	ENG-BlpI-R	TTCAGCTCAGCAGCAGAGGTG
DM	c.-287C>A	ENG-c.-287CA-BamHI-F	tagtggatccATACCACAGCCTTCATaTGCGCC
DM	c.-271G>T	ENG-c.-271GT-F	TGGGGCCAtGACTGCTG
DM	c.-271G>T	ENG-c.-271GT-R	CAGCAGTCaTGGCCCCA
DM	c.-249C>G	ENG-c.-249CG-F	TCACTGCCATgCATTGGAGCC
DM	c.-249C>G	ENG-c.-249CG-R	GGCTCCAATGcATGGCAGTGA
DM	c.-182C>A	ENG-c.-182CA-F	CCCGCGTCCaTGTGTCCAC
DM	c.-182C>A	ENG-c.-182CA-R	GTGGACACAtGGACGCGGG
DM	c.-167C>A	ENG-c.-167CA-F	TCCACTTCTCaTGACCCCTCG
DM	c.-167C>A	ENG-c.-167CA-R	CGAGGGGTCAtGAGAAGTGGA
DM	c.-76C>T	ENG-c.-76CT-F	AGCCCACGCtGGCCCCGGT
DM	c.-76C>T	ENG-c.-76CT-R	ACCGGGGCCaGCGTGGGCT
DM	c.-37G>T	ENG-c.-37GT-F	TGGACACAtGATAAGGCCCAGCG
DM	c.-37G>T	ENG-c.-37GT-R	CGCTGGGCCTTATCaTGTGTCCA
DM	c.-33A>G	ENG-c.-33AG-F	TGGACACAGGATgAGGCCCAGCG
DM	c.-33A>G	ENG-c.-33AG-R	CGCTGGGCCTcATCCTGTGTCCA
DM	c.-31G>T	ENG-c.-31GT-F	TGGACACAGGATAAtGCCCAGCG
DM	c.-31G>T	ENG-c.-31GT-R	CGCTGGGCaTTATCCTGTGTCCA
qPCR	All	ENG-qPCR-Ex9-F	ACAAGTTTGTCTTGCGCAGT
qPCR	All	ENG-qPCR-Ex11-R	CTGTCCATGTTGAGGCAGTG
qPCR	All	hu_TUBA F	GATGCTGCCAATAACTATGCCCGAG
qPCR	All	hu_TUBA R	GAAAACCAAGAAGCCCTGAAGACGG
qPCR	None	PLAUR-qPCR-ex3-F	CTGTACCCACTCAGAGAAGAC
qPCR	None	PLAUR-qPCR-ex4-R	GAGGTAACGGCTTCGGGA
Sequencing	All	CMV-F	CGCAAATGGGCGGTAGGCGTG
Sequencing	***	ENG-seq1-F	CATGTCCTCTTCCTGGAGTTC
*, all variants except c.-287C>A; **, c.-287C>A, c.-271G>T, c.-249C>G, c.-182C>A, c.-167C>A; ***, c.-76C>T, c.-37G>T, c.-33A>G and c.-31G>T.
